# Supplementary material for: Photocatalytic synthesis of alkynylsulfones and alkenylsulfones using sulfonylhydrazides and alkynes
Source: Royal Society of Chemistry journal article supplement (doi:10.1039/d3ob00729d), 2023-01-01

## Supporting Information

# Photocatalytic Synthesis of Alkynylsulfones and Alkenylsulfones Using Sulfonylhydrazides and Alkynes

Xiaoju Yang,<sup>a</sup> Jumei Yi,<sup>b</sup> Xinhan Li,<sup>a</sup> Yihang Wu,<sup>b</sup> Jun Dong,<sup>b</sup> Zhenxiu He,<sup>b</sup> Guangzhi Zeng,<sup>\*b</sup>

Jianbin Xu<sup>\*a</sup> and Baomin Fan<sup>\*a</sup>

### Table of contents

|                                                                                       |     |
|---------------------------------------------------------------------------------------|-----|
| General information.....                                                              | S1  |
| General procedure for synthesis of substrates .....                                   | S1  |
| Control experiments .....                                                             | S4  |
| General experimental methods .....                                                    | S5  |
| <sup>1</sup> H NMR and <sup>13</sup> C NMR spectra data of products or materials..... | S6  |
| General procedure for the synthesis of ( <i>E</i> )-Vinyl Sulfones .....              | S21 |
| <sup>1</sup> H and <sup>13</sup> C NMR Spectra.....                                   | S29 |

---

## General information

Bromoalkyne were synthesized according to literature procedure. A part of Arylsulfonylhydrazides were synthesized according to literature procedure. Other commercially available reagents and solvents were purchased and used without further purification. All catalytic experiments were performed under an atmosphere of argon by using Glove Box.  $^1\text{H}$  NMR (400 MHz) and  $^{13}\text{C}$  NMR (100 MHz) spectra were recorded on a Bruker NMR spectrometer in  $\text{CDCl}_3$  using TMS as an internal reference with chemical shift values reported in ppm. Abbreviations used in the NMR follow-up experiments: s, singlet; d, doublet; t, triplet; q, quartet; m, multiplet. High-resolution mass spectra (HRMS) were obtained by fast atom bombardment (FAB) using a double focusing magnetic sector mass spectrometer and electron impact ( $\text{EI}^+$ ) ionization technique.

### General procedure for synthesis of substrates

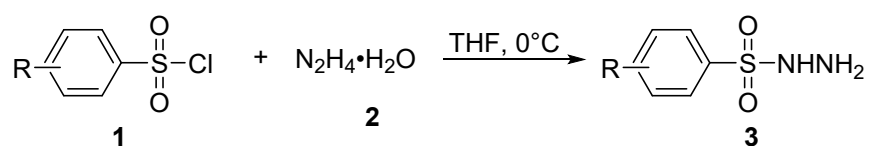

Preparation of sulfonyl hydrazides. A water (30mL) solution of hydrazine hydrate (0.5 g, 10 mmol), was cooled in ice-water bath to  $-5^\circ\text{C}$ . The temperature was then maintained below  $8^\circ\text{C}$ , while the THF(10 mL) solution of sulfonyl chloride (0.3 g, 1 mmol) was slowly added with stirring. After the addition was completed the reaction mixture was stirred

at room temperature for thirty minutes and tetrahydrofuran was evaporated at reduced pressure. The white solid product was separated by filtration, washed with water (3×15 mL) and dried on air overnight to give pure product (90% yield).<sup>[1]</sup>

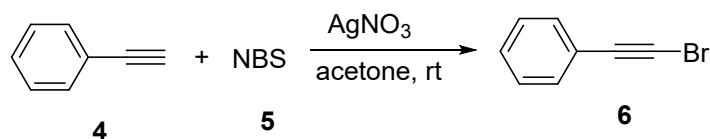

Synthesis of aryl halide:  $\text{AgNO}_3$  (0.17 g, 1 mmol) was added to a solution of phenylacetylene (2.58 mL, 20 mmol) in acetone (50 mL). Then NBS (4.27 g, 24 mmol) was added in portion. The mixture was stirred for 3 h at room temperature, and then concentrated in vacuo. The residue was dissolved in petroleum ether and filtered through a short column of silica gel. Solvent was removed in vacuo to afford a pale-yellow oil of bromoalkyne (99% yield).<sup>[2]</sup>

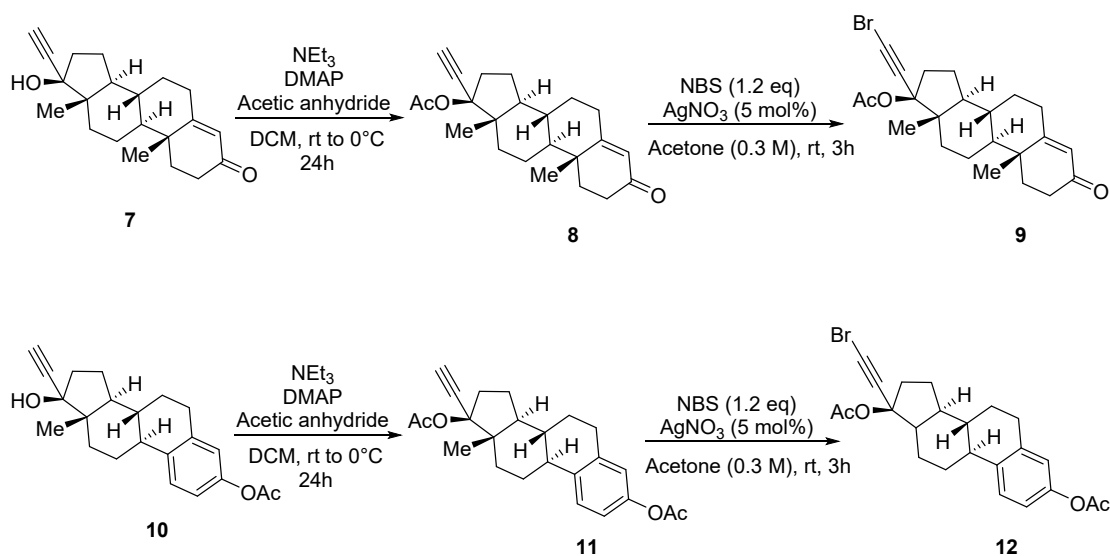

---

Synthesis of bromo ethisterone: DMAP (1.4 mmol),  $\text{NEt}_3$  (4 mmol) and acetic anhydride (4 mmol) were added to a solution of ethisterone (1.4 mmol) in  $\text{CH}_2\text{Cl}_2$  (0.1 M) at 0 °C. The reaction mixture was stirred for 24 h at room temperature and then concentrated. The residue was purified by chromatography (Hexane: Ethyl acetate= 80: 20) to give the ethisterone acetate in 98% yield.<sup>[3]</sup>

To a solution of ethisterone acetate (1 equiv) in acetone (0.3 M) was added NBS (1.2 equiv) and  $\text{AgNO}_3$  (5 mol%) at room temperature and then the mixture was stirred for 3 h. After removing excess acetone, the concentrated residue was quenched with  $\text{NH}_4\text{Cl}$  solution. Organic layer was extracted with diethyl ether (20 ml x 2), dried over anhydrous  $\text{Na}_2\text{SO}_4$ , concentrated under reduced pressure, and chromatographed to give 62% yield (Hexane: Ethyl acetate= 85: 15).

## Control experiments

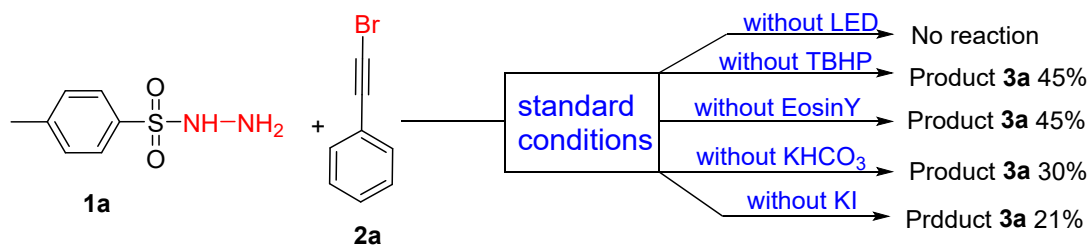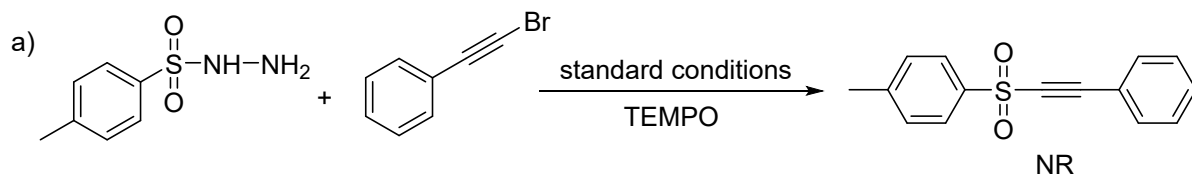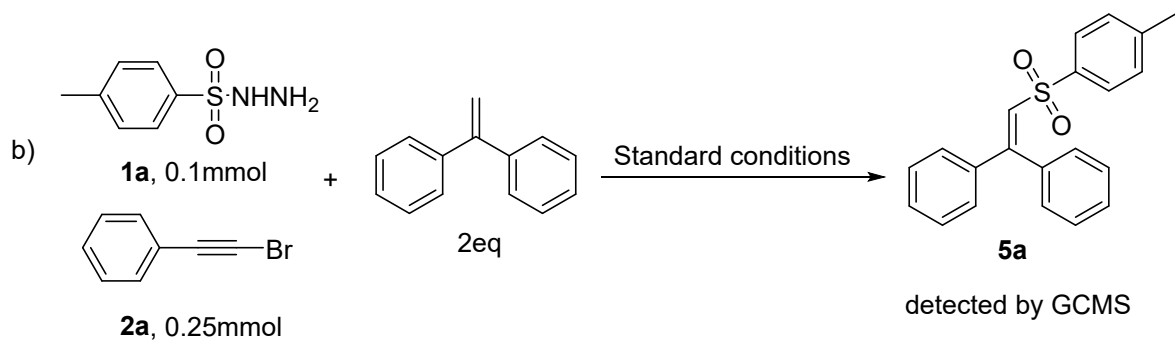

|       |            |             |              |         |          |          |                    |
|-------|------------|-------------|--------------|---------|----------|----------|--------------------|
| 样品名称  | YXJ-4-13   | 位置          | 31           | 仪器名称    | GCMS5977 | 用户名      |                    |
| 注射量   | 1          | InjPosition |              | 样品类型    |          | IRM 校准状态 | Not Applicable     |
| 数据文件名 | YXJ-4-13.D | 采集方法        | YCH-HM-INM.M | Comment |          | 采集时间     | 2022/7/12 16:12:22 |

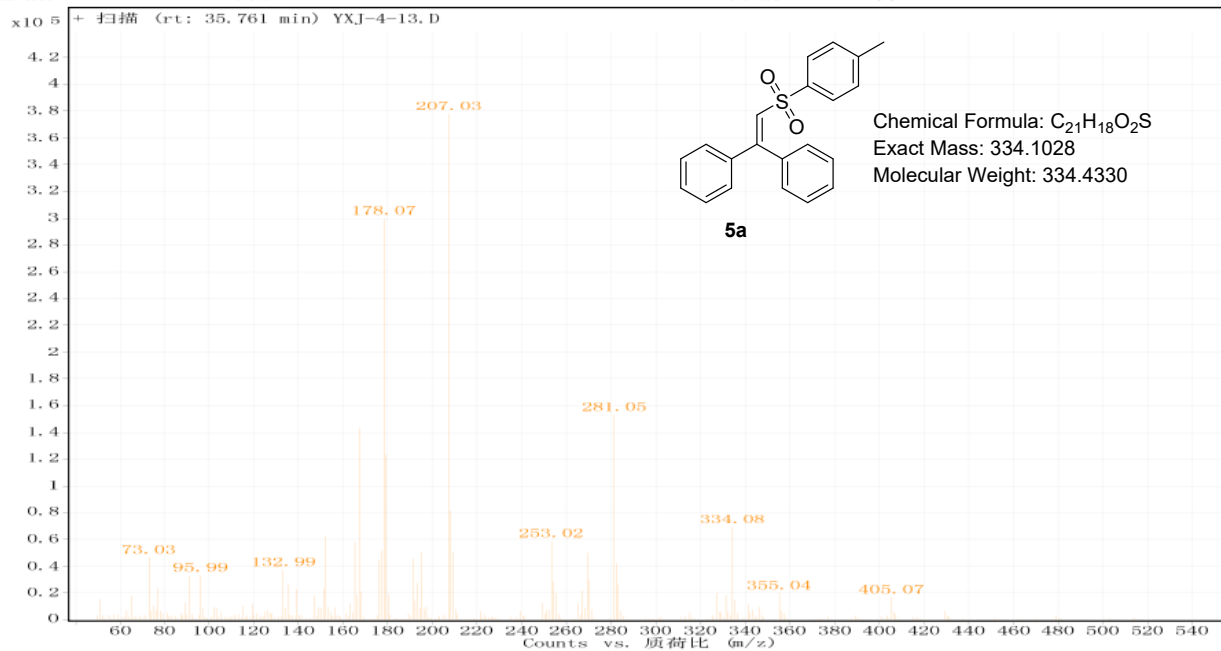

---

## General experimental methods

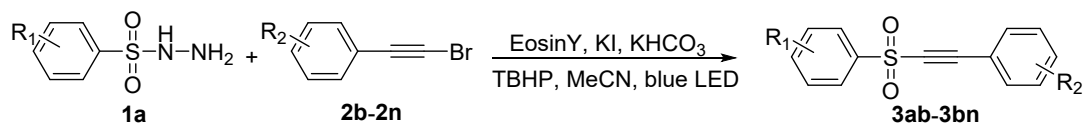

Under Ar or  $\text{N}_2$  atmosphere, to an oven-dried Schlenk tube was equipped with magnetic stir bar and charged with arylsulfonyl hydrazides (0.1 mmol, 1.0 equiv), bromoalkyne (0.25 mmol, 2.5 equiv), Eosin Y (0.002 mmol, 0.02 equiv), KI (0.1 mmol, 1.0 equiv),  $\text{KHCO}_3$  (0.1 mmol, 1.0 equiv), TBHP (0.1 mmol, 1.0 equiv), and MeCN (1 mL). The mixture was then irradiated by 30 W blue LED (460 nm-470 nm) at room temperature until the starting material disappeared from the TLC. The reaction mixture was concentrated in vacuum and the residue was purified by chromatography on silica gel, eluting with the mixture of ethyl acetate/petroleum ether to give alkynyl sulfones products.

---

$^1\text{H}$  NMR and  $^{13}\text{C}$  NMR spectra data of products or materials

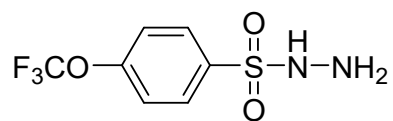

**4-(trifluoromethoxy)benzenesulfonylhydrazide(3)**

$^1\text{H}$  NMR (400 MHz, Methanol- $d_4$ )  $\delta$  8.01 (d,  $J = 8.9$  Hz, 2H), 7.49 (d,  $J = 8.2$  Hz, 2H), 4.85 (s, 2H).  $^{13}\text{C}$  NMR (101 MHz, Chloroform- $d$ )  $\delta$  146.7, 139.1, 134.8, 129.1, 128.8, 128.7, 128.0, 127.4.  $^{19}\text{F}$  NMR (376 MHz, Chloroform- $d$ )  $\delta$  -57.69. HRMS-EI $^+$  ( $m/z$ )  $[\text{M}+\text{H}]^+$  calcd for  $\text{C}_7\text{H}_7\text{N}_2\text{O}_3\text{F}_3\text{S}$  257.0202, found 257.0201.

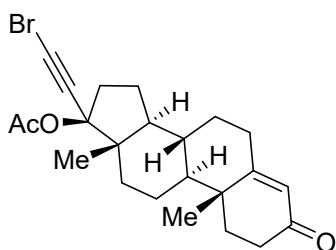

**(8R,9S,10R,13S,14S,17S)-17-(bromoethynyl)-10,13-dimethyl-3-oxo-2,3,6,7,8,9,10,11,12,13,14,15,16,17-tetradecahydro-1H-cyclopenta[a]phenanthren-17-yl acetate.(9)<sup>[3]</sup>**

$^1\text{H}$  NMR (400 MHz, Chloroform- $d$ )  $\delta$  5.74 (s, 1H), 2.72 (td,  $J = 9.5, 4.8$  Hz, 1H), 2.48 – 2.26 (m, 5H), 2.03 – 1.97 (m, 1H), 1.81 – 1.66 (m, 6H), 1.57 (td,  $J = 11.0, 3.4$  Hz, 1H), 1.52 – 1.31 (m, 4H), 1.20 (s, 4H), 1.14 – 0.97 (m, 3H), 0.90 (s, 3H).

---

$^{13}\text{C}$  NMR (101 MHz, Chloroform-*d*)  $\delta$  199.5, 170.9, 169.4, 124.0, 85.1, 53.2, 48.4, 47.9, 46.7, 38.6, 37.1, 36.0, 35.7, 34.0, 33.0, 32.7, 31.5, 23.6, 21.4, 20.7, 17.4, 13.5.

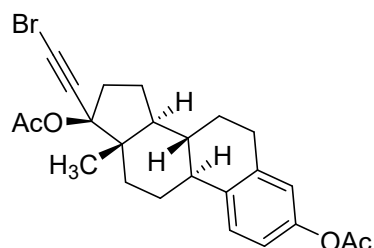

**(8R,9S,13S,14S,17S)-17-(bromoethynyl)-13-methyl-7,8,9,11,12,13,14,15,16,17-decahydro-6H-cyclopenta[a]phenanthrene-3,17-diyl diacetate.**(12)<sup>[3]</sup>

$^1\text{H}$  NMR (400 MHz, Chloroform-*d*)  $\delta$  7.31 – 7.26 (m, 1H), 6.85 (dd,  $J = 8.4, 2.6$  Hz, 1H), 6.79 (d,  $J = 2.5$  Hz, 1H), 2.87 (dd,  $J = 8.4, 4.1$  Hz, 2H), 2.76 (m,  $J = 15.1, 9.7, 5.9$  Hz, 1H), 2.37 (dt,  $J = 12.8, 3.6$  Hz, 1H), 2.29 (s, 3H), 2.05 (d,  $J = 1.4$  Hz, 3H), 2.02 – 1.79 (m, 4H), 1.72 – 1.62 (m, 1H), 1.56 – 1.34 (m, 4H), 0.89 (s, 3H).

$^{13}\text{C}$  NMR (101 MHz, Chloroform-*d*)  $\delta$  169.9, 169.5, 148.4, 138.2, 137.8, 126.5, 121.5, 118.6, 85.3, 48.3, 48.0, 46.6, 43.6, 38.8, 37.1, 33.3, 29.5, 27.1, 26.2, 23.4, 21.4, 21.2, 13.5.

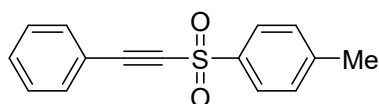

**1-methyl-4-((phenylethynyl)sulfonyl)benzene (3aa)**<sup>[4]</sup>

21.8 mg, 85% yield; white solid,  $^1\text{H}$  NMR (400 MHz, Chloroform-*d*)  $\delta$  7.99 – 7.94 (m, 2H), 7.54 – 7.50 (m, 2H), 7.50 – 7.44 (m, 1H), 7.38 (dt,



---

$J = 8.6, 7.2$  Hz, 4H), 2.47 (s, 3H).  $^{13}\text{C}$  NMR (101 MHz, Chloroform-*d*)  $\delta$  145.4, 139.0, 132.7, 131.5, 130.0, 128.7, 127.5, 118.0, 93.0, 85.6, 21.7.

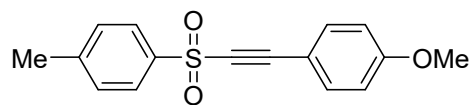

**1-methoxy-4-(tosylethynyl)benzene(3ab)<sup>[4]</sup>**

25.8 mg, 90% yield; white solid,  $^1\text{H}$  NMR (400 MHz, Chloroform-*d*)  $\delta$  7.98 – 7.92 (m, 2H), 7.49 – 7.44 (m, 2H), 7.40 – 7.36 (m, 2H), 6.90 – 6.84 (m, 2H), 3.83 (s, 3H), 2.46 (s, 3H).  $^{13}\text{C}$  NMR (101 MHz, Chloroform-*d*)  $\delta$  145.3, 139.1, 138.6, 133.2, 132.4, 123.0, 129.9, 128.6, 127.5, 117.8, 93.4, 85.3, 21.7, 21.1.

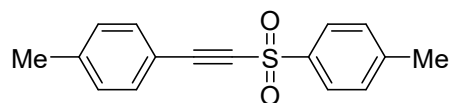

**1-methyl-4-((p-tolyethynyl)sulfonyl)benzene (3ac)<sup>[4]</sup>**

23.0 mg, 82% yield; white solid,  $^1\text{H}$  NMR (400 MHz, Chloroform-*d*)  $\delta$  7.95 (d,  $J = 8.1$  Hz, 2H), 7.39 (t,  $J = 8.3$  Hz, 4H), 7.16 (d,  $J = 7.9$  Hz, 2H), 2.46 (s, 3H), 2.37 (s, 3H).  $^{13}\text{C}$  NMR (101 MHz, Chloroform-*d*)  $\delta$  145.2, 142.3, 139.1, 132.7, 130.0, 129.5, 127.5, 114.9, 93.7, 85.2, 21.8, 21.7.

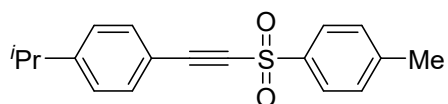

**1-isopropyl-4-(tosylethynyl)benzene (3ad)<sup>[4]</sup>**

---

23.9 mg, 77% yield; white solid,  $^1\text{H}$  NMR (400 MHz, Chloroform-*d*)  $\delta$  7.95 (d,  $J = 8.4$  Hz, 2H), 7.43 (s, 2H), 7.38 (d,  $J = 7.9$  Hz, 2H), 7.22 (d,  $J = 8.2$  Hz, 2H), 2.91 (p,  $J = 6.9$  Hz, 1H), 2.46 (s, 3H), 1.22 (d,  $J = 6.9$  Hz, 6H).  $^{13}\text{C}$  NMR (101 MHz, Chloroform-*d*)  $\delta$  153.1, 145.2, 139.2, 132.9, 130.0, 127.4, 126.9, 115.2, 93.8, 85.1, 34.3, 23.6, 21.7.

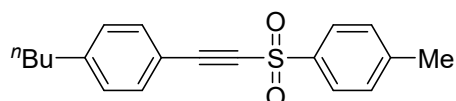

### 1-butyl-4-(tosylethynyl)benzene (3ae)<sup>[5]</sup>

27.5 mg, 88% yield; colorless liquid,  $^1\text{H}$  NMR (400 MHz, Chloroform-*d*)  $\delta$  7.99 – 7.93 (m, 2H), 7.46 – 7.35 (m, 4H), 7.20 – 7.14 (m, 2H), 2.65 – 2.58 (m, 2H), 2.46 (s, 3H), 1.61 – 1.52 (m, 2H), 1.31 (tt,  $J = 14.1, 7.1$  Hz, 2H), 0.91 (t,  $J = 7.3$  Hz, 3H).  $^{13}\text{C}$  NMR (101 MHz, Chloroform-*d*)  $\delta$  147.3, 145.3, 139.1, 132.7, 130.0, 128.8, 127.4, 115.0, 93.8, 85.2, 35.8, 33.1, 22.3, 21.8, 13.9.

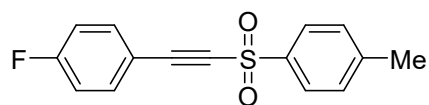

### 1-fluoro-4-(tosylethynyl)benzene (3af)<sup>[4]</sup>

20.6 mg, 71% yield; white solid,  $^1\text{H}$  NMR (400 MHz, Chloroform-*d*)  $\delta$  7.95 (d,  $J = 8.4$  Hz, 2H), 7.53 (dd,  $J = 8.9, 5.2$  Hz, 2H), 7.41 (s, 2H), 7.07 (t,  $J = 8.7$  Hz, 2H), 2.47 (s, 3H).  $^{13}\text{C}$  NMR (101 MHz, Chloroform-*d*)  $\delta$  164.4 (d,  $^1J_{\text{C-F}} = 253$  Hz), 145.5, 138.8, 135.1, 135.1 (d,  $^3J_{\text{C-F}} = 1.0$

---

H<sub>z</sub>), 127.5, 116.3 (d, <sup>2</sup>J<sub>C-F</sub> = 23.2 Hz), 114.2, 114.2, 91.8, 85.6, 85.6, 21.8.

<sup>19</sup>F NMR (376 MHz, Chloroform-*d*) δ -104.62.

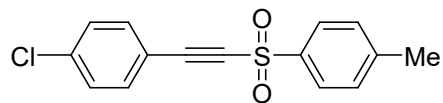

**1-chloro-4-(tosylethynyl)benzene (3ag)**<sup>[4]</sup>

25.6 mg, 88% yield; white solid, <sup>1</sup>H NMR (400 MHz, Chloroform-*d*) δ 7.95 (d, *J* = 8.4 Hz, 2H), 7.45 (d, *J* = 8.6 Hz, 2H), 7.38 (dd, *J* = 18.7, 8.3 Hz, 4H), 2.48 (s, 3H). <sup>13</sup>C NMR (101 MHz, Chloroform-*d*) δ 145.6, 138.7, 138.0, 133.9, 130.1, 129.2, 127.6, 116.5, 91.5, 86.5, 21.8.

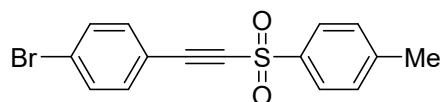

**1-butyl-4-(tosylethynyl)benzene (3ah)**<sup>[4]</sup>

30.2 mg, 90% yield; white solid, <sup>1</sup>H NMR (400 MHz, Chloroform-*d*) δ 7.95 (d, *J* = 8.4 Hz, 2H), 7.52 (d, *J* = 8.5 Hz, 2H), 7.43 – 7.35 (m, 4H), 2.48 (s, 3H). <sup>13</sup>C NMR (101 MHz, Chloroform-*d*) δ 145.6, 138.7, 134.0, 132.1, 130.1, 127.6, 126.5, 117.0, 91.6, 86.6, 21.8.

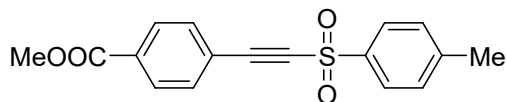

**1-methyl 4-(tosylethynyl)benzoate (3ai)**<sup>[4]</sup>

9.5 mg, 30% yield; white solid, <sup>1</sup>H NMR (400 MHz, Chloroform-*d*) δ 8.06 – 7.94 (m, 4H), 7.61 – 7.57 (m, 2H), 7.44 – 7.38 (m, 2H), 3.93 (s,

---

3H), 2.48 (s, 3H).  $^{13}\text{C}$  NMR (101 MHz, Chloroform-*d*)  $\delta$  165.8, 145.7, 138.6, 132.7, 132.4, 130.1, 129.7, 127.7, 122.4, 91.2, 87.6, 52.5, 21.8.

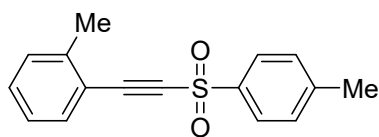

**1-methyl-2-(tosylethynyl)benzene (3aj)**<sup>[6]</sup>

23.5 mg, 87% yield, yellow oil,  $^1\text{H}$  NMR (400 MHz, Chloroform-*d*)  $\delta$  7.99 – 7.94 (m, 2H), 7.46 (dd,  $J$  = 7.8, 1.4 Hz, 1H), 7.41 – 7.32 (m, 3H), 7.24–7.14 (m, 2H), 2.47 (s, 3H), 2.38 (s, 3H).  $^{13}\text{C}$  NMR (101MHz, Chloroform-*d*)  $\delta$  145.3, 142.4, 139.3, 133.0, 131.5, 130.0, 129.9, 127.4, 125.9, 117.9, 92.6, 89.3, 21.7, 20.4.

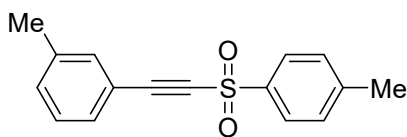

**1-methyl-3-(tosylethynyl)benzene (3ak)**<sup>[4]</sup>

21.8 mg, 80% yield; white solid,  $^1\text{H}$  NMR (400 MHz, Chloroform-*d*)  $\delta$  7.96 (d,  $J$  = 8.4 Hz, 2H), 7.39 (d,  $J$  = 8.1 Hz, 2H), 7.32 (dd,  $J$  = 8.8, 1.9 Hz, 2H), 7.30 – 7.22 (m, 2H), 2.47 (s, 3H), 2.33 (s, 3H).  $^{13}\text{C}$  NMR (101 MHz, Chloroform-*d*)  $\delta$  162.1, 145.1, 139.3, 134.7, 129.9, 127.4, 114.4, 109.7, 94.1, 84.9, 55.5, 21.7.

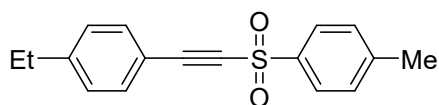

---

### 1-ethyl-4-(tosylethynyl)benzene (3al)<sup>[7]</sup>

25.6 mg, 90% yield; white solid, <sup>1</sup>H NMR (400 MHz, Chloroform-*d*) δ 7.95 (d, *J* = 8.3 Hz, 2H), 7.41 (dd, *J* = 20.1, 8.2 Hz, 4H), 7.19 (d, *J* = 8.2 Hz, 2H), 2.66 (q, *J* = 7.6 Hz, 2H), 2.46 (s, 3H), 1.21 (t, *J* = 7.6 Hz, 3H). <sup>13</sup>C NMR (101 MHz, Chloroform-*d*) δ 148.5, 145.2, 139.2, 132.8, 130.0, 128.3, 127.5, 115.1, 93.7, 85.2, 29.0, 21.7, 15.1.

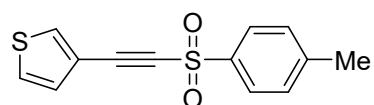

### 3-(tosylethynyl)thiophene (3am)<sup>[4]</sup>

19.7 mg, 71% yield; white solid, <sup>1</sup>H NMR (400 MHz, Chloroform-*d*) δ 7.97 – 7.93 (m, 2H), 7.74 (dd, *J* = 3.0, 1.2 Hz, 1H), 7.39 (d, *J* = 8.1 Hz, 2H), 7.32 (dd, *J* = 5.1, 3.0 Hz, 1H), 7.17 (dd, *J* = 5.1, 1.2 Hz, 1H), 2.47 (s, 3H). <sup>13</sup>C NMR (101 MHz, Chloroform-*d*) δ 144.3, 137.9, 133.5, 129.0, 128.7, 126.5, 125.5, 116.2, 87.6, 84.5, 20.7.

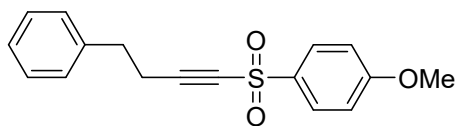

### 1-methoxy-4-((4-phenylbut-1-yn-1-yl)sulfonyl)benzene (3an)

12.6 mg, 42% yield; colorless oil, <sup>1</sup>H NMR (400 MHz, Chloroform-*d*) δ 7.90 – 7.85 (m, 2H), 7.27 – 7.21 (m, 3H), 7.13 – 7.09 (m, 2H), 7.04 – 6.98 (m, 2H), 3.90 (s, 3H), 2.84 (t, *J* = 7.4 Hz, 2H), 2.64 (td, *J* = 7.4, 0.6 Hz, 2H). <sup>13</sup>C NMR (101 MHz, Chloroform-*d*) δ 164.0, 139.0, 129.6,

---

128.6, 128.3, 126.8, 114.4, 95.5, 55.8, 55.7, 33.2, 21.2. HRMS-EI<sup>+</sup> (m/z)

[M+Na]<sup>+</sup> calcd for 323.0712, found 323.0712.

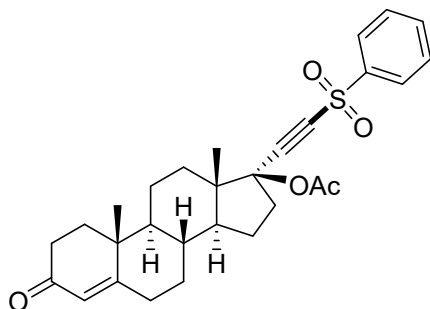

**(10aR,11bR)-10a,11b-dimethyl-3-oxo-9-((phenylsulfonyl)ethynyl)-2,3,5,6,6a,7,7a,8,9,10,10a,11,11a,11b-tetradecahydro-1H-cyclopenta[b]phenanthren-9-yl acetate.(3ao)**

<sup>1</sup>H NMR (400 MHz, Chloroform-*d*) δ 8.01 (d, *J* = 7.6 Hz, 2H), 7.66 (t, *J* = 7.4 Hz, 1H), 7.57 (t, *J* = 7.7 Hz, 2H), 5.75 (s, 1H), 2.69-2.40 (m, 1H), 2.45 – 2.26 (m, 5H), 2.01 (s, 4H), 1.83 – 1.67 (m, 5H), 1.55 (dd, *J* = 11.4, 3.6 Hz, 2H), 1.44 – 1.32 (m, 3H), 1.17 (s, 3H), 0.99 (dd, *J* = 12.4, 4.4 Hz, 2H), 0.89 (s, 3H). <sup>13</sup>C NMR (101 MHz, Chloroform-*d*) δ 199.5, 170.5, 169.1, 142.1, 134.3, 129.5, 127.3, 124.2, 95.3, 83.6, 83.3, 53.1, 49.2, 48.8, 38.6, 36.8, 35.9, 35.8, 34.1, 33.1, 32.7, 31.5, 23.7, 21.1, 20.6, 17.5, 13.6. TOFMS-ESI<sup>+</sup> (m/z) [M+H]<sup>+</sup>calcd for C<sub>29</sub>H<sub>34</sub>O<sub>5</sub>S 495.21997, found 495.21903. m.p.: 198 °C-200 °C.

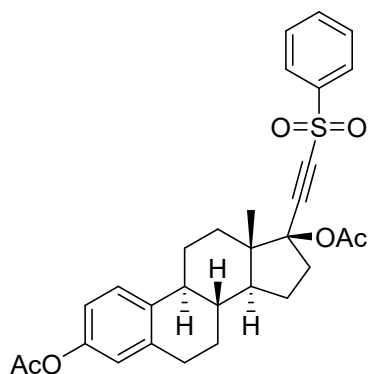

**(13S)-13-methyl-17-((phenylsulfonyl)ethynyl)-7,8,9,11,12,13,14,15,16,17-decahydro-6H-cyclopenta[a]phenanthrene-3,17-diyl diacetate.(3ap)**

$^1\text{H}$  NMR (400 MHz, Chloroform-*d*)  $\delta$  8.03 (dd,  $J = 7.3, 1.7$  Hz, 2H), 7.69 – 7.53 (m, 3H), 7.28 – 7.21 (m, 1H), 6.89 – 6.77 (m, 2H), 2.85 (dd,  $J = 8.9, 4.3$  Hz, 2H), 2.29 (s, 3H), 2.23 – 2.07 (m, 2H), 2.02 (s, 4H), 1.86 – 1.75 (m, 3H), 1.61 (m,  $J = 13.0, 4.1$  Hz, 1H), 1.42 (m,  $J = 19.5, 8.3, 6.1$  Hz, 5H), 0.87 (s, 3H).

$^{13}\text{C}$  NMR (101 MHz, Chloroform-*d*)  $\delta$  169.9, 169.0, 148.5, 142.1, 138.0, 137.3, 134.1, 129.3, 127.2, 126.4, 121.6, 118.8, 95.5, 83.3, 49.2, 48.7, 43.4, 38.7, 36.8, 33.2, 29.4, 27.0, 26.0, 23.3, 21.2, 21.0, 13.4. TOFMS-ESI<sup>+</sup> ( $m/z$ )  $[\text{M}+\text{H}]^+$  calcd for  $\text{C}_{30}\text{H}_{32}\text{O}_6\text{S}$  521.19924, found 521.19885. m.p.: 170 °C-175 °C

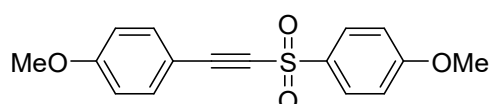

**1-methoxy-4-(((4-methoxyphenyl)ethynyl)sulfonyl)benzene (3bb)<sup>[8]</sup>**

---

25.7 mg, 80% yield; yellow oil,  $^1\text{H}$  NMR (400 MHz, Chloroform-*d*)  $\delta$  7.99 (d,  $J = 8.9$  Hz, 2H), 7.45 (d,  $J = 8.9$  Hz, 2H), 7.04 (d,  $J = 9.0$  Hz, 2H), 6.86 (d,  $J = 8.9$  Hz, 2H), 3.89 (s, 3H), 3.82 (s, 3H).  $^{13}\text{C}$  NMR (101 MHz, Chloroform-*d*)  $\delta$  164.1, 162.1, 134.6, 133.8, 129.7, 114.5, 114.4, 109.8, 93.6, 85.1, 55.8, 55.5.

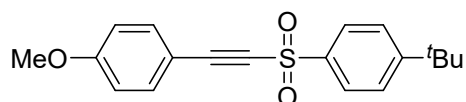

**1-(tert-butyl)-4-(((4-methoxyphenyl)ethynyl)sulfonyl)benzene (3b c)**<sup>[6]</sup>

32.2 mg, 98% yield; yellow oil,  $^1\text{H}$  NMR (400 MHz, Chloroform-*d*)  $\delta$  7.98 (d,  $J = 8.7$  Hz, 2H), 7.62 – 7.57 (m, 2H), 7.50 – 7.45 (m, 2H), 6.90 – 6.84 (m, 2H), 3.82 (s, 3H), 1.36 (s, 9H).  $^{13}\text{C}$  NMR (101 MHz, Chloroform-*d*)  $\delta$  162.1, 158.0, 139.1, 134.7, 127.2, 126.4, 114.4, 109.7, 94.1, 84.9, 55.5, 35.4, 31.1.

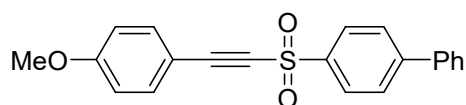

**4-((phenylethynyl)sulfonyl)-1,1'-biphenyl (3bd)**<sup>[9]</sup>

26.7 mg, 85% yield; white solid,  $^1\text{H}$  NMR (400 MHz, Chloroform-*d*)  $\delta$  8.13 (d,  $J = 8.9$  Hz, 2H), 7.53 – 7.38 (m, 5H), 6.88 (d,  $J = 8.9$  Hz, 2H), 3.83 (s, 3H).  $^{13}\text{C}$  NMR (101 MHz, Chloroform-*d*)  $\delta$  162.4, 153.1, 153.1, 140.3, 134.8, 129.7, 121.0, 114.5, 109.2, 95.5, 84.3, 55.5.



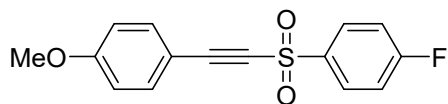

**1-fluoro-4-(((4-methoxyphenyl)ethynyl)sulfonyl)benzene (3be)**<sup>[10]</sup>

21.8 mg, 75% yield; yellow oil, <sup>1</sup>H NMR (400 MHz, Chloroform-*d*) δ 8.14 – 8.06 (m, 2H), 7.47 (d, *J* = 8.8 Hz, 2H), 7.31 – 7.22 (m, 2H), 6.93 – 6.85 (m, 2H), 3.83 (s, 3H). <sup>13</sup>C NMR (101 MHz, Chloroform-*d*) δ 166.0 (d, <sup>1</sup>*J*<sub>C-F</sub> = 257.6 Hz) 162.3, 138.2, 138.2, 134.8, 130.4, 130.3, 116.7 (d, <sup>2</sup>*J*<sub>C-F</sub> = 23.2 Hz), 114.49, 114.49, 109.3, 94.9, 84.5, 55.5. <sup>19</sup>F NMR (376 MHz, Chloroform-*d*) δ -102.68.

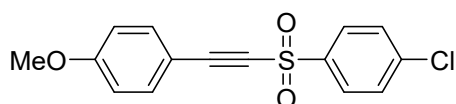

**1-chloro-4-(((4-methoxyphenyl)ethynyl)sulfonyl)benzene (3bf)**<sup>[10]</sup>

29.5 mg, 96% yield; white solid, <sup>1</sup>H NMR (400 MHz, Chloroform-*d*) δ 8.02 – 7.99 (m, 2H), 7.59 – 7.54 (m, 2H), 7.50 – 7.45 (m, 2H), 6.91 – 6.85 (m, 2H), 3.83 (s, 3H). <sup>13</sup>C NMR (101 MHz, Chloroform-*d*) δ 162.4, 140.7, 140.6, 134.8, 129.7, 128.8, 114.5, 109.2, 95.3, 84.4, 55.5.

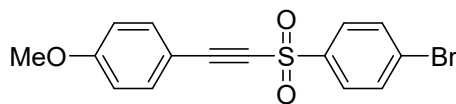

**1-bromo-4-(((4-methoxyphenyl)ethynyl)sulfonyl)benzene (3bg)**<sup>[10]</sup>

29.9 mg, 85% yield; white solid, <sup>1</sup>H NMR (400 MHz, Chloroform-*d*) δ 7.97 – 7.90 (m, 2H), 7.76 – 7.70 (m, 2H), 7.51 – 7.45 (m, 2H), 6.92 –

---

6.85 (m, 2H), 3.83 (s, 3H).  $^{13}\text{C}$  NMR (101 MHz, Chloroform-*d*)  $\delta$  162.4, 141.1, 134.8, 132.7, 132.5, 129.4, 129.0, 128.9, 114.5, 109.2, 95.4, 84.3, 55.5.

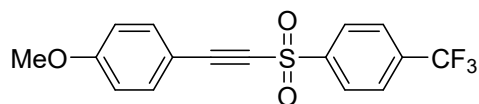

**1-methoxy-4-(((4-(trifluoromethyl)phenyl)sulfonyl)ethynyl)benzene (3bh)<sup>[10]</sup>**

27.2 mg, 80% yield; yellow solid,  $^1\text{H}$  NMR (400 MHz, Chloroform-*d*)  $\delta$  8.21 (d,  $J = 8.1$  Hz, 2H), 7.86 (d,  $J = 8.3$  Hz, 2H), 7.53 – 7.46 (m, 2H), 6.92 – 6.86 (m, 2H), 3.84 (s, 3H).  $^{13}\text{C}$  NMR (101 MHz, Chloroform-*d*)  $\delta$  162.5, 145.5, 135.7, 135.4, 134.9, 127.9, 126.6, 126.5, 126.5, 126.5, 124.5, 121.8, 114.6, 109.0, 96.3, 84.0, 55.5.

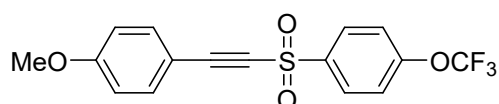

**1-((phenylethynyl)sulfonyl)-4-(trifluoromethoxy)benzene (3bi)**

32.1 mg, 90% yield; white solid,  $^1\text{H}$  NMR (400 MHz, Chloroform-*d*)  $\delta$  8.16 – 8.10 (m, 2H), 7.53 – 7.46 (m, 2H), 7.41 (d,  $J = 9.0$  Hz, 2H), 6.93 – 6.85 (m, 2H), 3.84 (s, 3H).  $^{13}\text{C}$  NMR (101 MHz, Chloroform-*d*)  $\delta$  162.4, 153.1 (q,  $^2J_{\text{C-F}} = 4.0$  Hz), 140.3, 134.8, 129.7, 121.3 (q,  $^1J_{\text{C-F}} = 46.5$  Hz), 118.9, 114.5, 109.2, 95.5, 84.3, 55.5.  $^{19}\text{F}$  NMR (376 MHz, Chloroform-*d*)

---

$\delta$  -57.64, -57.65. HRMS-EI<sup>+</sup> (m/z) [M+H]<sup>+</sup> calcd for C<sub>16</sub>H<sub>11</sub>O<sub>4</sub>F<sub>3</sub>S 357.0403 found 357.0403. m.p.: 90 °C~ 93 °C.

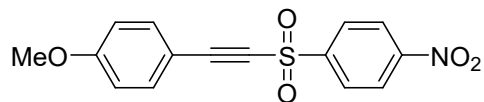

**1-methoxy-4-(((4-nitrophenyl)sulfonyl)ethynyl)benzene (3bj)**

17.5 mg, 50% yield; yellow solid, <sup>1</sup>H NMR (400 MHz, Chloroform-*d*)  $\delta$  8.42 (s, 2H), 8.28 (s, 2H), 7.50 (d, *J* = 8.8 Hz, 2H), 6.90 (d, *J* = 8.9 Hz, 2H), 3.84 (s, 3H). <sup>13</sup>C NMR (101 MHz, Chloroform-*d*)  $\delta$  162.7, 150.8, 147.5, 135.0, 128.7, 124.6, 114.6, 108.7, 97.3, 83.7, 55.5. TOFMS-ESI<sup>+</sup> (m/z) [M+H]<sup>+</sup>calcd for C<sub>16</sub>H<sub>11</sub>NO<sub>3</sub> 298.0532, found 298.0521. m.p.: 135 °C~ 138 °C.

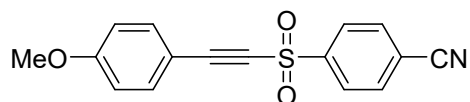

**4-(((4-methoxyphenyl)ethynyl)sulfonyl)benzonitrile (3bk)**

17.8 mg, 60% yield; white solid, <sup>1</sup>H NMR (400 MHz, Chloroform-*d*)  $\delta$  8.23 – 8.17 (m, 2H), 7.92 – 7.87 (m, 2H), 7.52 – 7.47 (m, 2H), 6.93 – 6.87 (m, 2H), 3.84 (s, 3H). <sup>13</sup>C NMR (101 MHz, Chloroform-*d*)  $\delta$  162.7, 146.0, 135.0, 133.2, 128.0, 117.6, 117.1, 114.6, 108.8, 97.0, 83.8, 55.5. TOFMS-ESI<sup>+</sup> (m/z) [M+H]<sup>+</sup>calcd for C<sub>16</sub>H<sub>11</sub>NO<sub>3</sub> 318.0431, found 318.0431. m.p.: 150 °C~ 153 °C.

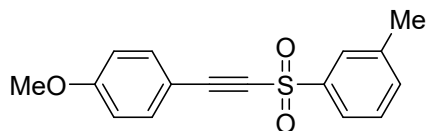

**1-(((4-methoxyphenyl)ethynyl)sulfonyl)-3-methylbenzene (3bl)**

27.2 mg, 95% yield; yellow oil,  $^1\text{H}$  NMR (400 MHz, Chloroform-*d*)  $\delta$  7.87 (d,  $J = 1.4$  Hz, 2H), 7.51 – 7.44 (m, 4H), 6.90 – 6.84 (m, 2H), 3.83 (s, 3H), 2.47 (s, 3H).  $^{13}\text{C}$  NMR (101 MHz, Chloroform-*d*)  $\delta$  162.2, 141.9, 139.7, 134.8, 134.7, 129.2, 127.6, 124.5, 114.4, 109.6, 94.4, 84.7, 55.5, 21.4. HRMS-EI $^+$  ( $m/z$ ) [ $\text{M}+\text{H}$ ] $^+$  calcd for  $\text{C}_{16}\text{H}_{14}\text{O}_3\text{S}$  287.0736, found 287.0734.

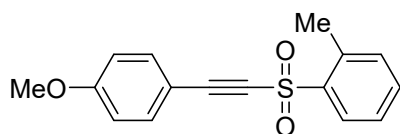

**1-(((4-methoxyphenyl)ethynyl)sulfonyl)-2-methylbenzene (3bm)<sup>[8]</sup>**

25.5 mg, 89% yield; white solid,  $^1\text{H}$  NMR (400 MHz, Chloroform-*d*)  $\delta$  8.12 (d,  $J = 9.4$  Hz, 1H), 7.58 – 7.34 (m, 5H), 6.88 (d,  $J = 8.9$  Hz, 2H), 3.83 (s, 3H), 2.82 (s, 3H).  $^{13}\text{C}$  NMR (101 MHz, Chloroform-*d*)  $\delta$  162.2, 140.0, 138.3, 134.8, 133.9, 132.7, 128.6, 126.5, 114.5, 109.5, 93.1, 84.4, 55.5, 20.1.

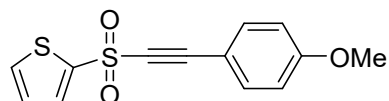

**2-(((4-methoxyphenyl)ethynyl)sulfonyl)thiophene (3bn)**

---

20.9 mg, 75% yield; yellow oil,  $^1\text{H}$  NMR (400 MHz, Chloroform-*d*)  $\delta$  7.85 (dd,  $J = 3.9, 1.4$  Hz, 1H), 7.75 (dd,  $J = 5.0, 1.4$  Hz, 1H), 7.53 – 7.47 (m, 2H), 7.16 (dd,  $J = 5.0, 3.8$  Hz, 1H), 6.92 – 6.86 (m, 2H), 3.83 (s, 3H).  $^{13}\text{C}$  NMR (101 MHz, Chloroform-*d*)  $\delta$  162.3, 143.4, 134.8, 134.5, 134.0, 127.9, 114.5, 109.4, 94.5, 85.0, 55.5. HRMS-EI $^+$  (m/z)  $[\text{M}+\text{H}]^+$  calcd for  $\text{C}_{13}\text{H}_{10}\text{O}_3\text{S}_2$  279.0144, found 279.0141.

## General procedure for the synthesis of (*E*)-Vinyl Sulfones

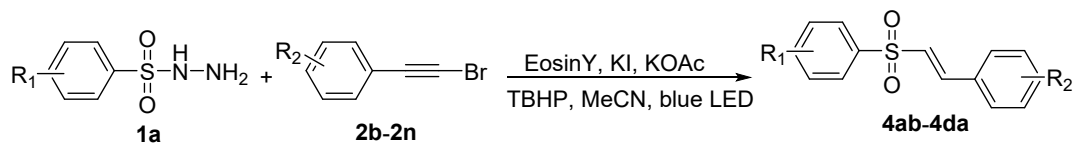

### (*E*)-1-methyl-4-((4-methylstyryl)sulfonyl)benzene (4ac)<sup>[11]</sup>

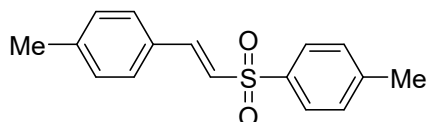

12.3 mg, 42 yield; White solid, <sup>1</sup>H NMR (400 MHz, Chloroform-*d*) δ 7.86 – 7.79 (m, 2H), 7.62 (d, *J* = 15.4 Hz, 1H), 7.35 (dd, *J* = 12.5, 8.1 Hz, 4H), 7.19 (d, *J* = 8.0 Hz, 2H), 6.79 (d, *J* = 15.3 Hz, 1H), 2.43 (s, 3H), 2.37 (s, 3H). <sup>13</sup>C NMR (101 MHz, Chloroform-*d*) δ 144.3, 142.0, 141.7, 138.0, 129.9, 129.8, 128.5, 127.7, 126.4, 21.6, 21.5.

### (*E*)-1-methyl-4-((4-methylstyryl)sulfonyl)benzene (4ad)<sup>[11]</sup>

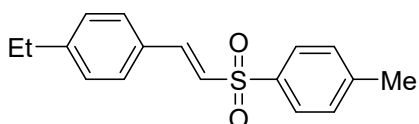

17.2mg, 60% yield; colorless oil, <sup>1</sup>H NMR (400 MHz, Chloroform-*d*) δ 7.86 – 7.79 (m, 2H), 7.62 (d, *J* = 15.4 Hz, 1H), 7.35 (dd, *J* = 12.5, 8.1 Hz, 4H), 7.19 (d, *J* = 8.0 Hz, 2H), 6.79 (d, *J* = 15.3 Hz, 1H), 2.43 (s, 3H), 2.37 (s, 3H). <sup>13</sup>C NMR (101 MHz, Chloroform-*d*) δ 144.3, 142.0, 141.7, 138.0, 129.9, 129.8, 128.5, 127.7, 126.4, 21.6, 21.5.

**(E)-1-isopropyl-4-(2-tosylvinyl)benzene (4ae)**<sup>[11]</sup>

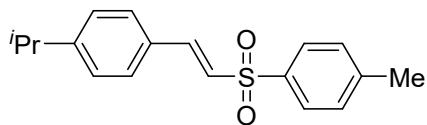

13.5 mg, 43% yield; colorless oil, <sup>1</sup>H NMR (400 MHz, Chloroform-*d*) δ 7.84 – 7.79 (m, 2H), 7.64 (d, *J* = 15.4 Hz, 1H), 7.44 – 7.38 (m, 2H), 7.36 – 7.31 (m, 2H), 7.26 – 7.22 (m, 2H), 6.79 (d, *J* = 15.4 Hz, 1H), 2.94 – 2.88 (m, 1H), 2.43 (s, 3H), 1.25 (s, 3H), 1.23 (s, 3H). <sup>13</sup>C NMR (101 MHz, Chloroform-*d*) δ 152.6, 144.2, 142.1, 138.0, 130.1, 129.9, 128.7, 127.7, 127.2, 126.5, 34.1, 23.7, 21.6.

**(E)-1-butyl-4-(2-(phenylsulfonyl)vinyl)benzene35 (4af)**<sup>[12]</sup>

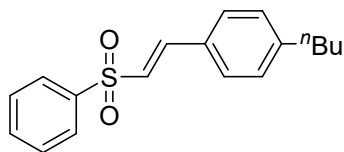

16.5 mg, 55% yield; colourless oil, <sup>1</sup>H NMR (400 MHz, Chloroform-*d*) δ 7.85 – 7.80 (m, 2H), 7.63 (d, *J* = 15.4 Hz, 1H), 7.41 – 7.31 (m, 4H), 7.21 – 7.17 (m, 2H), 6.79 (d, *J* = 15.4 Hz, 1H), 2.64 – 2.59 (m, 2H), 2.43 (s, 3H), 1.58 (d, *J* = 1.8 Hz, 2H), 1.37 – 1.30 (m, 2H), 0.91 (t, *J* = 7.3 Hz, 3H). <sup>13</sup>C NMR (101 MHz, Chloroform-*d*) δ 146.7, 144.2, 142.1, 138.0, 129.9, 129.2, 128.6, 127.7, 126.5, 35.6, 33.3, 22.3, 21.6, 13.9.

**(E)-1-methyl-2-(2-tosylvinyl)benzene (4aj)**<sup>[13]</sup>

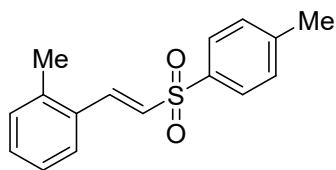

13.6 mg, 46% yield; colorless oil,  $^1\text{H}$  NMR (400 MHz, Chloroform-*d*)  $\delta$  7.94 (d,  $J = 15.3$  Hz, 1H), 7.83 (d,  $J = 8.0$  Hz, 2H), 7.43 (d,  $J = 7.8$  Hz, 1H), 7.35 (d,  $J = 8.0$  Hz, 2H), 7.30 – 7.25 (m, 1H), 7.19 (dd,  $J = 16.3, 8.0$  Hz, 2H), 6.77 (d,  $J = 15.3$  Hz, 1H), 2.45 (d,  $J = 5.3$  Hz, 6H).  $^{13}\text{C}$  NMR (101 MHz, Chloroform-*d*)  $\delta$  144.4, 139.6, 138.2, 137.7, 131.4, 131.1, 130.9, 130.0, 128.5, 127.7, 126.9, 126.5, 21.7, 19.8.

**(*E*)-1-fluoro-4-(2-tosylvinyl)benzene (4ah)**<sup>[11]</sup>

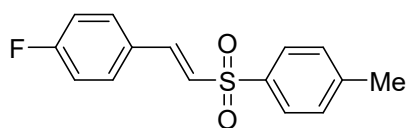

12.4 mg, 40% yield; white soild,  $^1\text{H}$  NMR (400 MHz, Chloroform-*d*)  $\delta$  7.86 – 7.80 (m, 2H), 7.62 (d,  $J = 15.4$  Hz, 1H), 7.52 – 7.43 (m, 2H), 7.38 – 7.32 (m, 2H), 7.12 – 7.05 (m, 2H), 6.78 (d,  $J = 15.4$  Hz, 1H), 2.44 (s, 3H).  $^{13}\text{C}$  NMR (101 MHz, Chloroform-*d*)  $\delta$  164.32 ( $^1J_{\text{C-F}} = 254.5$  Hz), 144.5, 140.6, 137.7, 130.5 (d,  $^3J_{\text{C-F}} = 9.1$  Hz), 130.0, 127.7, 116.3 ( $^2J_{\text{C-F}} = 22.2$  Hz), 21.6.  $^{19}\text{F}$  NMR (376 MHz, Chloroform-*d*)  $\delta$  -107.94.

**(*E*)-1-chloro-4-(2-tosylvinyl)benzene (4ai)**<sup>[11]</sup>

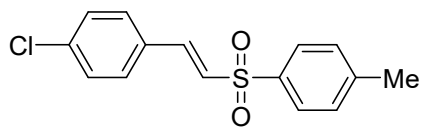



---

14.1 mg, 48% yield; white solid,  $^1\text{H}$  NMR (400 MHz, Chloroform-*d*)  $\delta$  7.85 – 7.80 (m, 2H), 7.60 (d,  $J = 15.4$  Hz, 1H), 7.43 – 7.33 (m, 6H), 6.83 (d,  $J = 15.4$  Hz, 1H), 2.44 (s, 3H).  $^{13}\text{C}$  NMR (101 MHz, Chloroform-*d*)  $\delta$  144.6, 140.4, 137.5, 137.2, 131.0, 130.0, 129.7, 129.4, 128.3, 127.8, 21.6.

**(*E*)-1-bromo-4-(2-tosylvinyl)benzene (4ag)**<sup>[11]</sup>

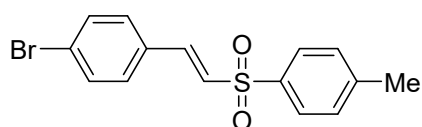

16.9 mg, 50% yield; white solid  $^1\text{H}$  NMR (400 MHz, Chloroform-*d*)  $\delta$  7.82 (d,  $J = 8.3$  Hz, 2H), 7.59 (d,  $J = 15.4$  Hz, 1H), 7.52 (d,  $J = 8.5$  Hz, 2H), 7.38 – 7.30 (m, 4H), 6.84 (d,  $J = 15.5$  Hz, 1H), 2.44 (s, 3H).  $^{13}\text{C}$  NMR (101 MHz, Chloroform-*d*)  $\delta$  144.6, 140.5, 137.5, 132.4, 131.4, 130.0, 129.9, 128.4, 127.8, 125.5, 21.6.

**(*E*)-1-methoxy-4-(styrylsulfonyl)benzene (4ba)**<sup>[11]</sup>

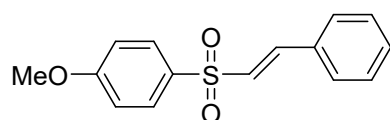

12.4 mg, 40% yield; white solid,  $^1\text{H}$  NMR (400 MHz, Chloroform-*d*)  $\delta$  8.00 (d,  $J = 9.0$  Hz, 2H), 7.53 – 7.44 (m, 3H), 7.40 – 7.30 (m, 3H), 7.05 (d,  $J = 9.0$  Hz, 2H), 3.90 (s, 3H).  $^{13}\text{C}$  NMR (101 MHz, Chloroform-*d*)  $\delta$  163.6, 141.4, 131.0, 130.1, 129.9, 129.1, 128.5, 128.0, 114.6, 55.7.

**(*E*)-1-(tert-butyl)-4-(styrylsulfonyl)benzene (4ca)**<sup>[14]</sup>

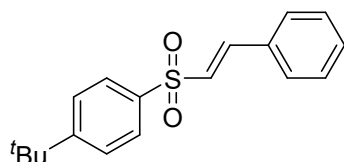

12.0 mg, 46% yield; colorless oil,  $^1\text{H}$  NMR (400 MHz, Chloroform-*d*)  $\delta$  7.90 – 7.84 (m, 2H), 7.67 (d,  $J = 15.4$  Hz, 1H), 7.58 – 7.46 (m, 5H), 7.40 (d,  $J = 1.0$  Hz, 2H), 6.86 (d,  $J = 15.4$  Hz, 1H), 1.34 (s, 9H).  $^{13}\text{C}$  NMR (101 MHz, Chloroform-*d*)  $\delta$  157.4, 142.0, 137.7, 132.5, 131.1, 129.1, 128.5, 127.7, 127.6, 126.4, 35.3, 31.1.

**(*E*)-1-methyl-4-(styrylsulfonyl)benzene (4da)**<sup>[11]</sup>

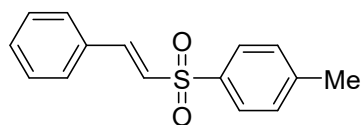

14.2 mg, 53% yield; White solid,  $^1\text{H}$  NMR (400 MHz, Chloroform-*d*)  $\delta$  7.83 (d,  $J = 8.1$  Hz, 2H), 7.66 (d,  $J = 15.4$  Hz, 1H), 7.48 (dd,  $J = 7.7$ , 2.1 Hz, 2H), 7.37 (dt,  $J = 19.4$ , 6.7 Hz, 5H), 6.85 (d,  $J = 15.3$  Hz, 1H), 2.44 (s, 3H).  $^{13}\text{C}$  NMR (101 MHz, Chloroform-*d*)  $\delta$  144.4, 142.0, 137.8, 132.5, 131.1, 130.0, 129.1, 128.5, 127.7, 127.7, 21.6.

**(*E*)-1-methyl-3-(styrylsulfonyl)benzene (4ea)**<sup>[11]</sup>

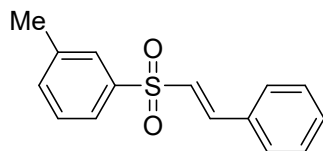

11.1 mg, 50% yield; colorless oil,  $^1\text{H}$  NMR (400 MHz, Chloroform-*d*)  $\delta$  7.78 – 7.65 (m, 3H), 7.52 – 7.47 (m, 2H), 7.44 – 7.38 (m, 5H), 6.86 (d,  $J = 15.4$  Hz, 1H), 2.44 (s, 3H).  $^{13}\text{C}$  NMR (101 MHz, Chloroform-*d*)  $\delta$

---

142.3, 140.6, 139.7, 134.2, 132.5, 131.2, 129.2, 129.1, 128.6, 128.0,  
127.5, 124.8, 21.3.

---

## Reference

- [1] G. F. Zhang, Q. K. Fan, H. M. Wang, Y. Y. Zhao, and C. R. Ding. NaHSO<sub>3</sub>-Mediated Direct Synthesis of Sulfinic Esters from Sulfonyl Hydrazides under Transition-Metal-Free Conditions[J]. *Advanced Synthesis & Catalysis*, **2021**, 363(3): 833-837.
- [2] Y. P. Gao, G. J. Wu, Q. Zhou, and J. B. Wang. Palladium-Catalyzed Oxygenative Cross-Coupling of Ynamides and Benzyl Bromides by Carbene Migratory Insertion[J]. *Angewandte Chemie International Edition*, **2018**, 57(10): 2716-2720.
- [3] Oh K H, Kim S M, Park S Y, and Park J. K. Base-Controlled Cu-Catalyzed Tandem Cyclization/Alkynylation for the Synthesis of Indolizines[J]. *Organic Letters*, **2016**, 18, 9, 2204–2207.
- [4] X. T. Meng, H. H. Xu, X. J. Cao, X. M. Cai, J.Y. Luo, F. Wang, and S.L. Huang. Electrochemically Enabled Sulfonylation of Alkynes with Sodium Sulfinates[J]. *Organic Letters*, **2020**, 22(17): 6827-6831.
- [5] H. M. Guo, Q. Q. Zhou, X. Jiang, D. Q. Shi, and W. J. Xiao. Catalyst- and Oxidant-Free Desulfonative C–P Couplings for the Synthesis of Phosphine Oxides and Phosphonates[J]. *Advanced Synthesis & Catalysis*, **2017**, 359(23): 4141-4146.
- [6] Tanaka I, Sawamura M, Shimizu Y. Visible Light-Induced Reductive Alkynylation of Aldehydes by Umpolung Approach[J]. *Organic Letters*, **2022**, 24(2): 520-524.
- [7] C. S. Dai, J. Q. Wang, S. Q. Deng, C. D. Zhou, Wenhe Zhang, Qiuhua Zhu and Xiaodong Tang. Acid-mediated sulfonylation of arylethynylbromides with sodium arylsulfonates: synthesis of (E)-1,2-bis(arylsulfonyl)ethylenes and arylacetylenic sulfones[J]. *RSC Advances*, **2017**, 7(57): 36112-36116.
- [8] Z. Y. Mo, Y. Z. Zhang, G. B. Huang, X. Y. Wang, Y. M. Pan, H. T. Tang. Electrochemical Sulfonylation of Alkynes with Sulfonyl Hydrazides: A Metal- and Oxidant-Free Protocol for the Synthesis of Alkynyl Sulfones[J]. *Advanced Synthesis & Catalysis*, **2020**, 362(11): 2160-2167.
- [9] D. D. He, W. T. Zhong, M. M. Zhou, B.W. Wang, M. Li, H. F. Jiang, and W. Q. Wu. Palladium-Catalyzed Regio- and Stereoselective Coupling of Alkynylsulfones with Alkenes: Access to Dichlorinated Vinyl Sulfones[J]. *Organic Letters*, **2022**, 24(31): 5802-5806.

- 
- [10] L. Ding, Y. X. Liu, K. K. Niu and Q. M. Wang. Photochemical alkylation of hydrosilanes by iron catalysis[J]. *Chemical Communications*, **2022**, 58(76): 10679-10682.
- [11] G. W. Rong, J. C. Mao, H. Yan, Y. Zheng, and G. Q. Zhang. Iron/Copper Co-Catalyzed Synthesis of Vinyl Sulfones from Sulfonyl Hydrazides and Alkyne Derivatives[J]. *The Journal of Organic Chemistry*, **2015**, 80(9): 4697-4703.
- [12] A. Kumar , G. Shelke , V. Rao , K. Pericherla. An Efficient and Facile Synthesis of Vinyl Sulfones via Microwave-Assisted Copper Triflate Catalyzed Hydrosulfonylation of Alkynes[J]. *Synlett*, **2014**, 25(16): 2345-2349.
- [13] Y. L. Xu, X. D. Tang, W. G. Hu, W. Q. Wu and H. F. Jiang. Transition-metal-free synthesis of vinyl sulfones via tandem cross-decarboxylative/coupling reactions of sodium sulfinates and cinnamic acids[J]. *Green Chem.*, **2014**, 16(8): 3720-3723.
- [14] Y. Fang, D. P. Xu, Y. L. Yu, R. M. Tang, S. S. Dai, Z. H. Wang, and W. Zhang. Controlled Synthesis of  $\beta$ -Keto Sulfones and Vinyl Sulfones under Electrochemical Oxidation[J]. *European Journal of Organic Chemistry*, **2022**, 2022(13): 2023-02-19.

# $^1\text{H}$ and $^{13}\text{C}$ NMR Spectra

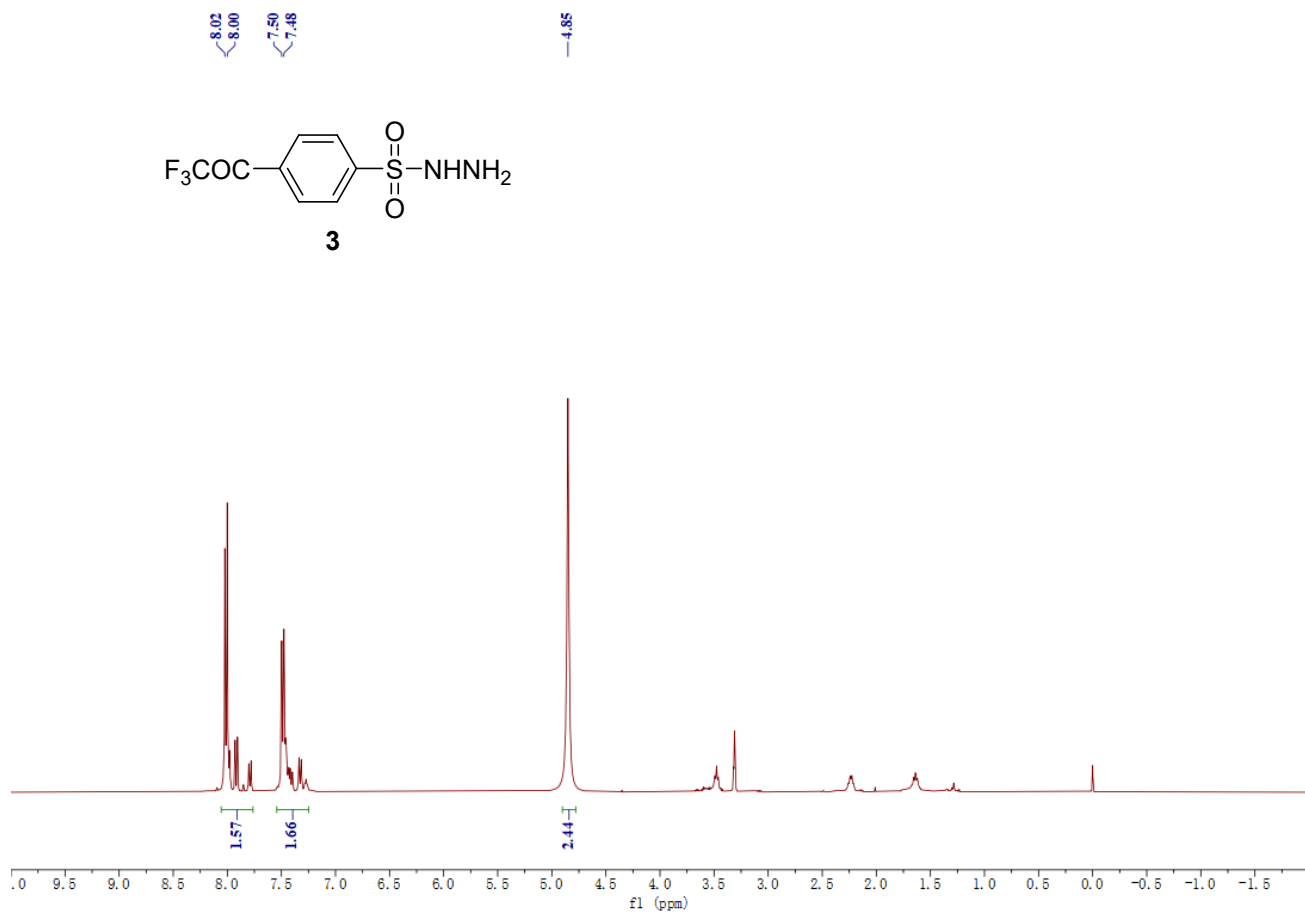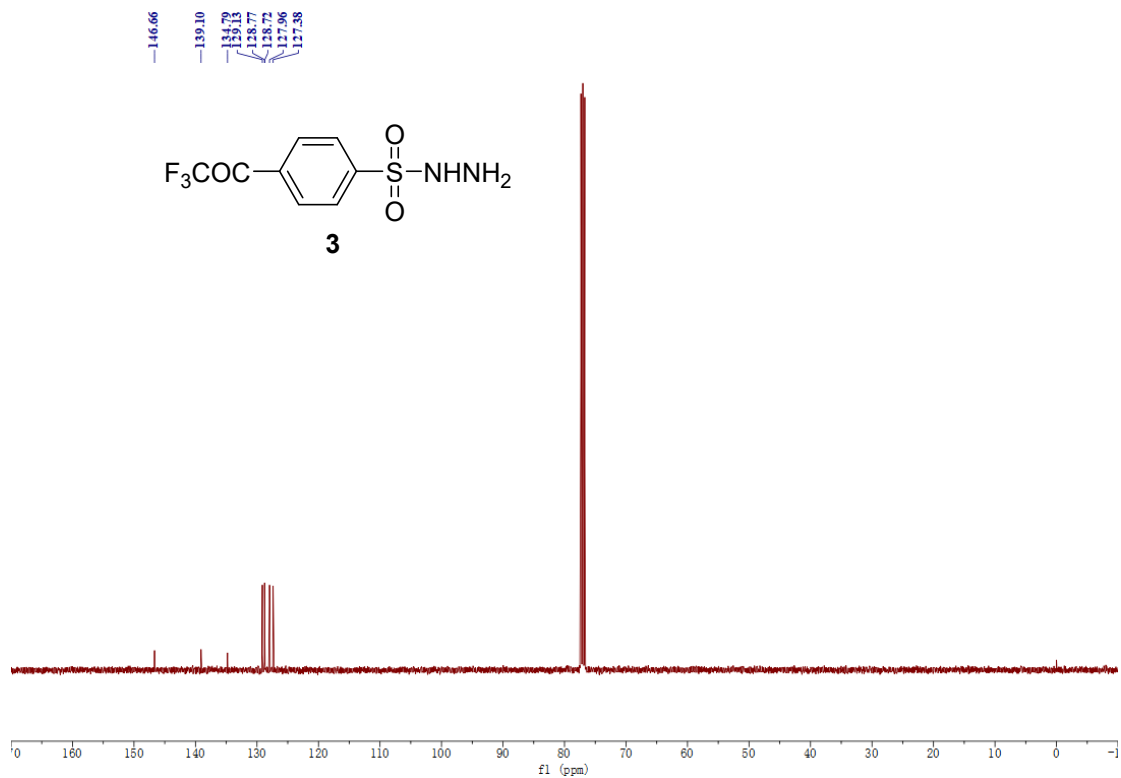



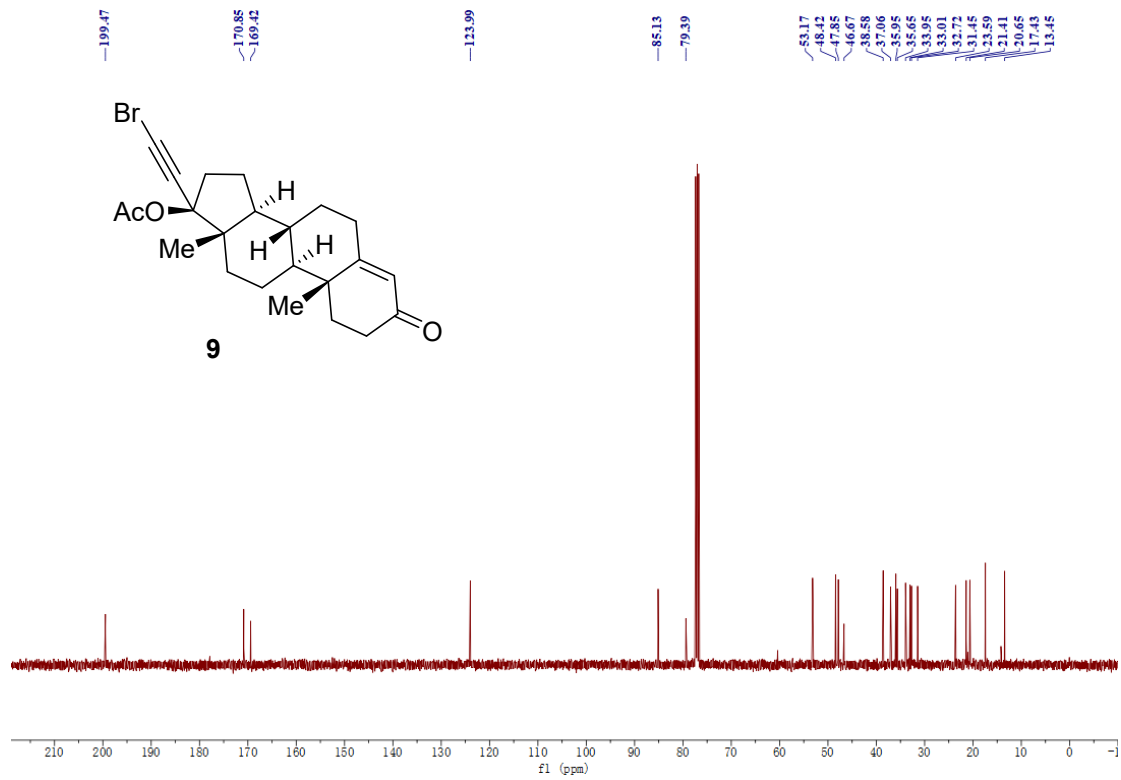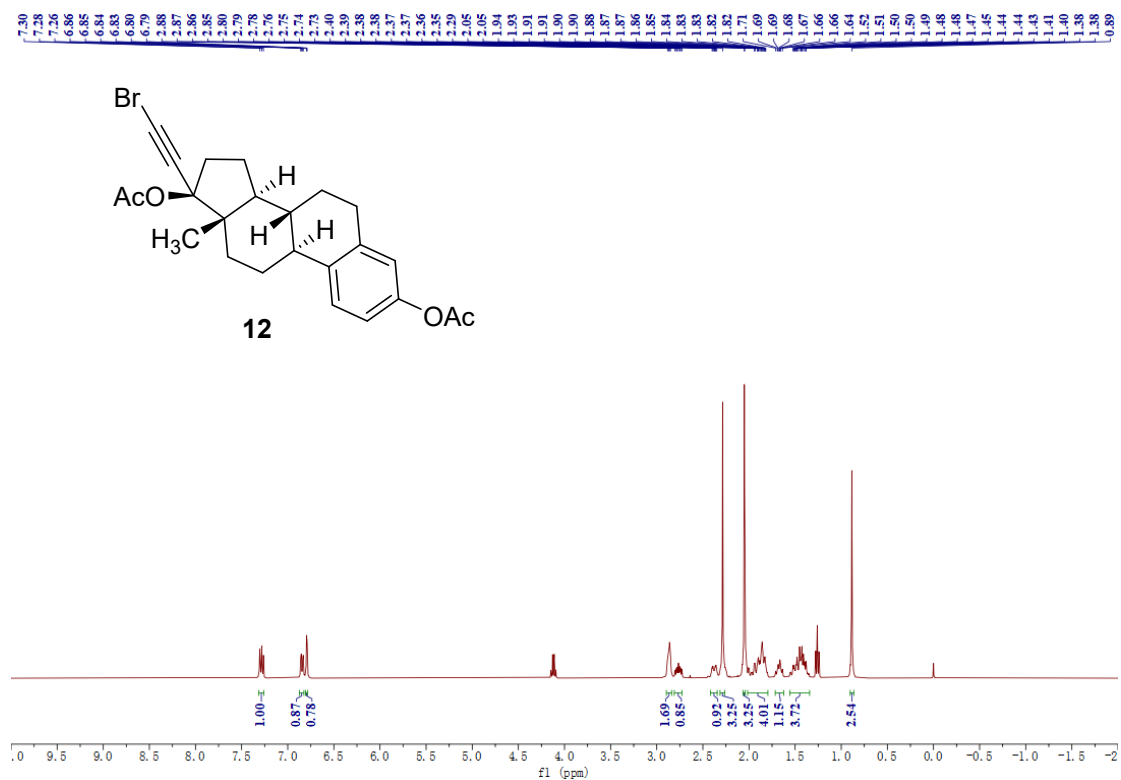



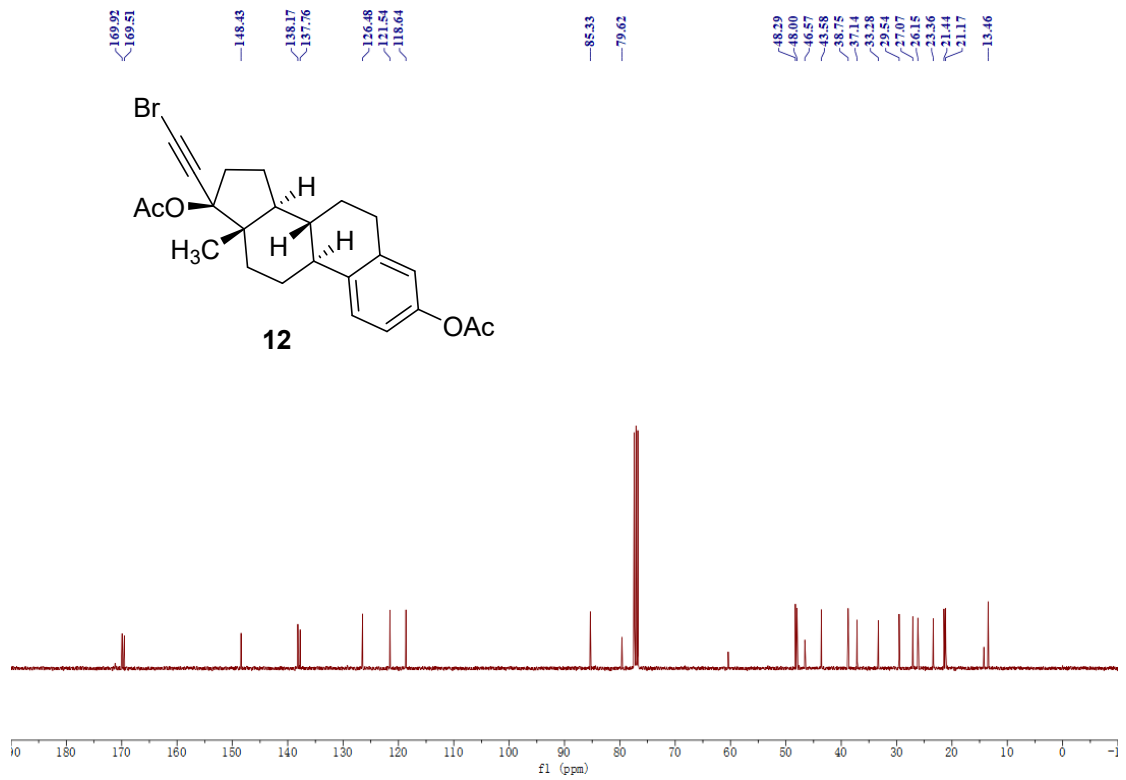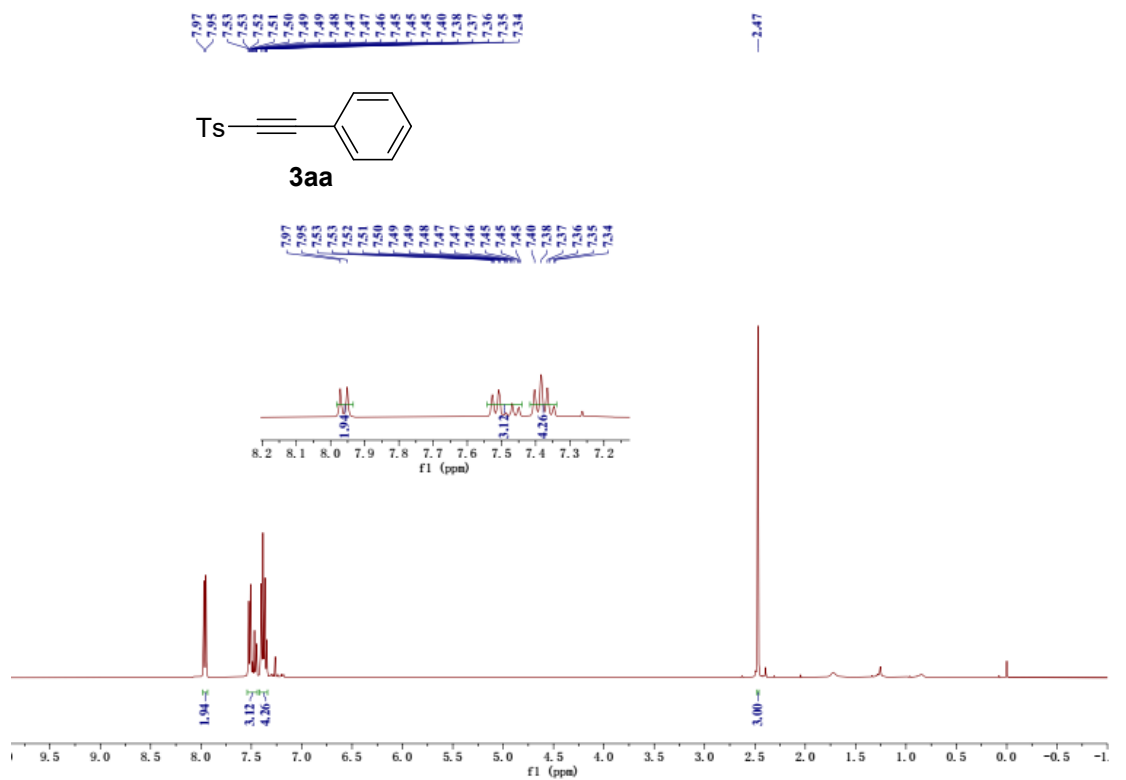

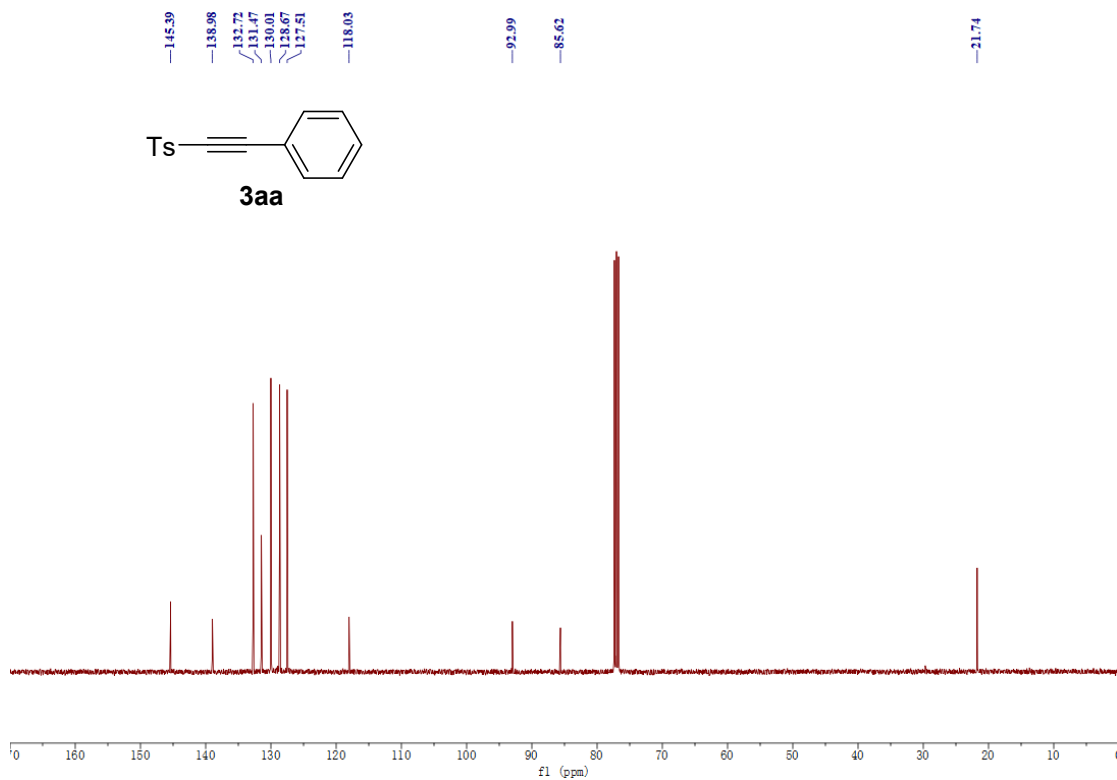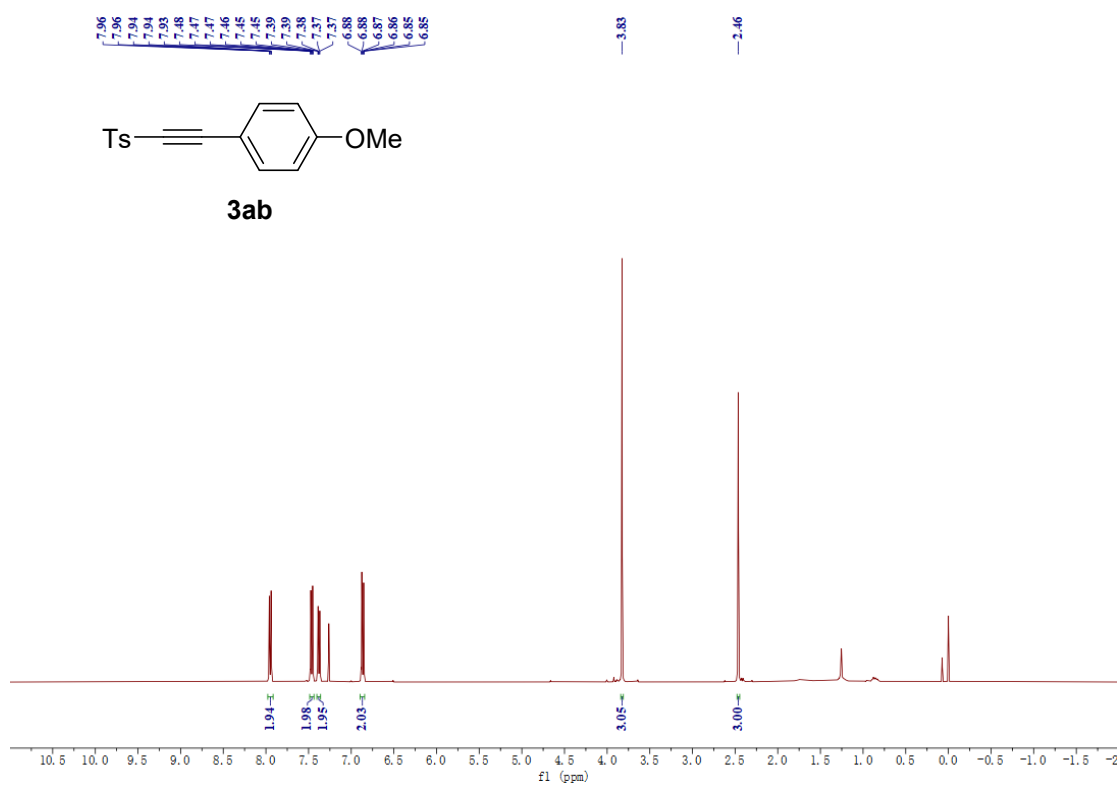

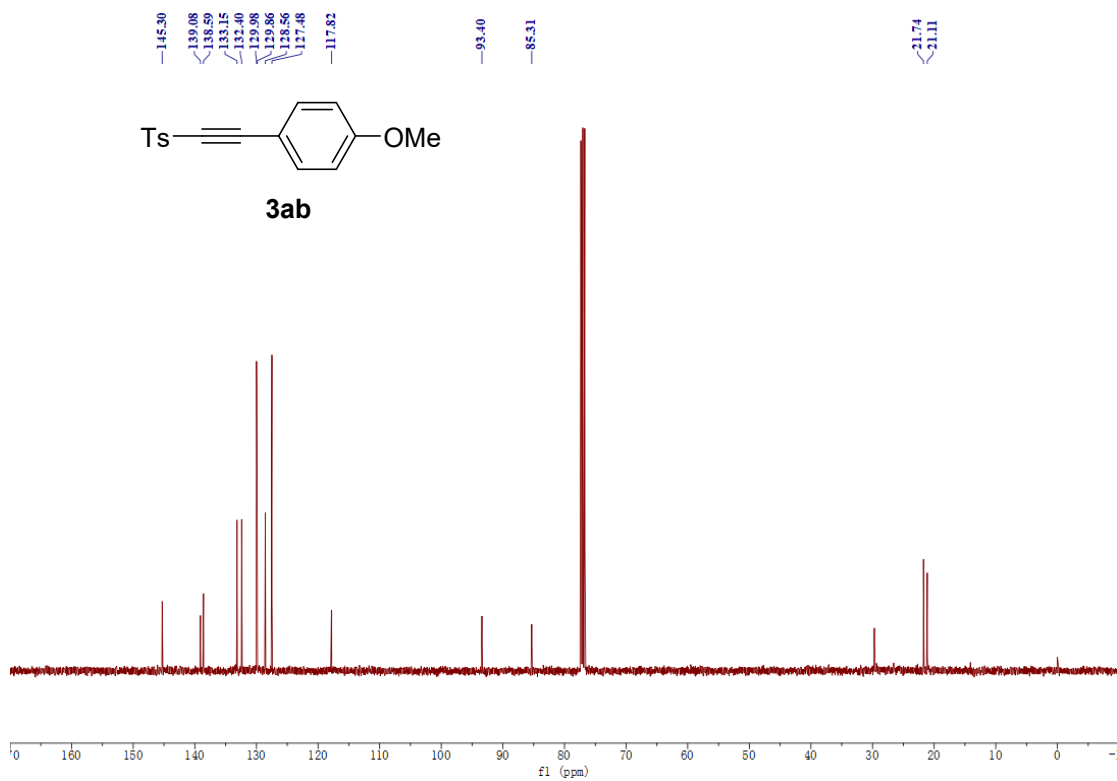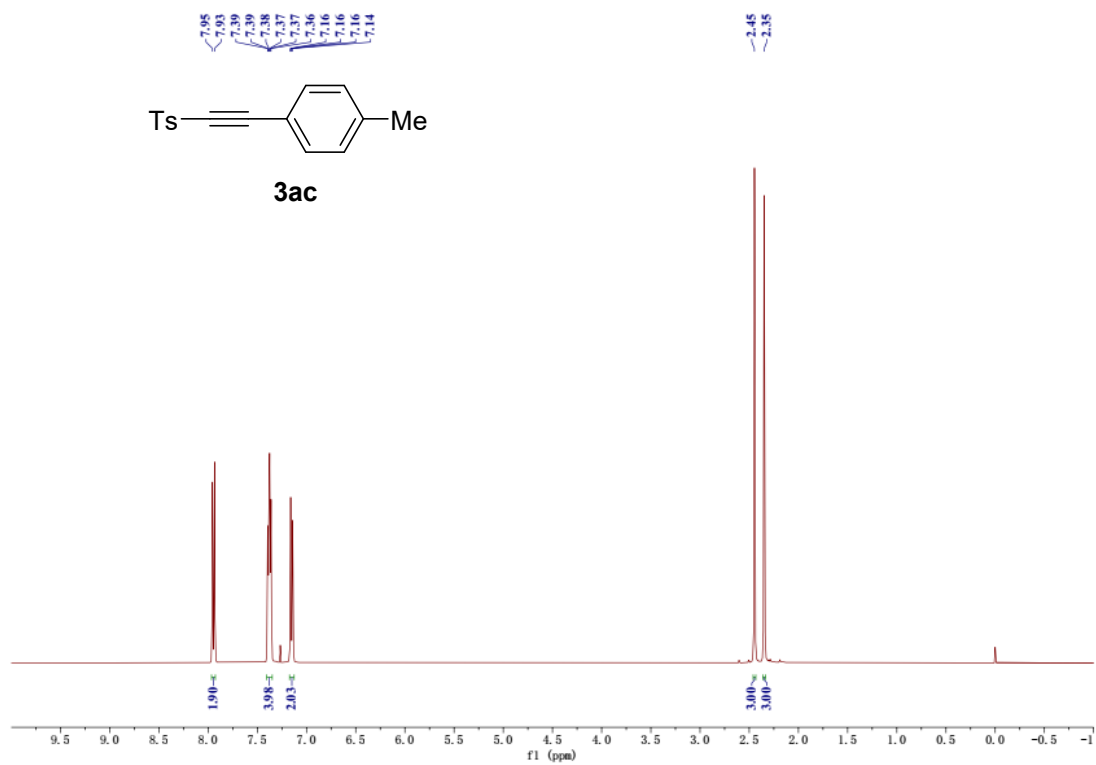

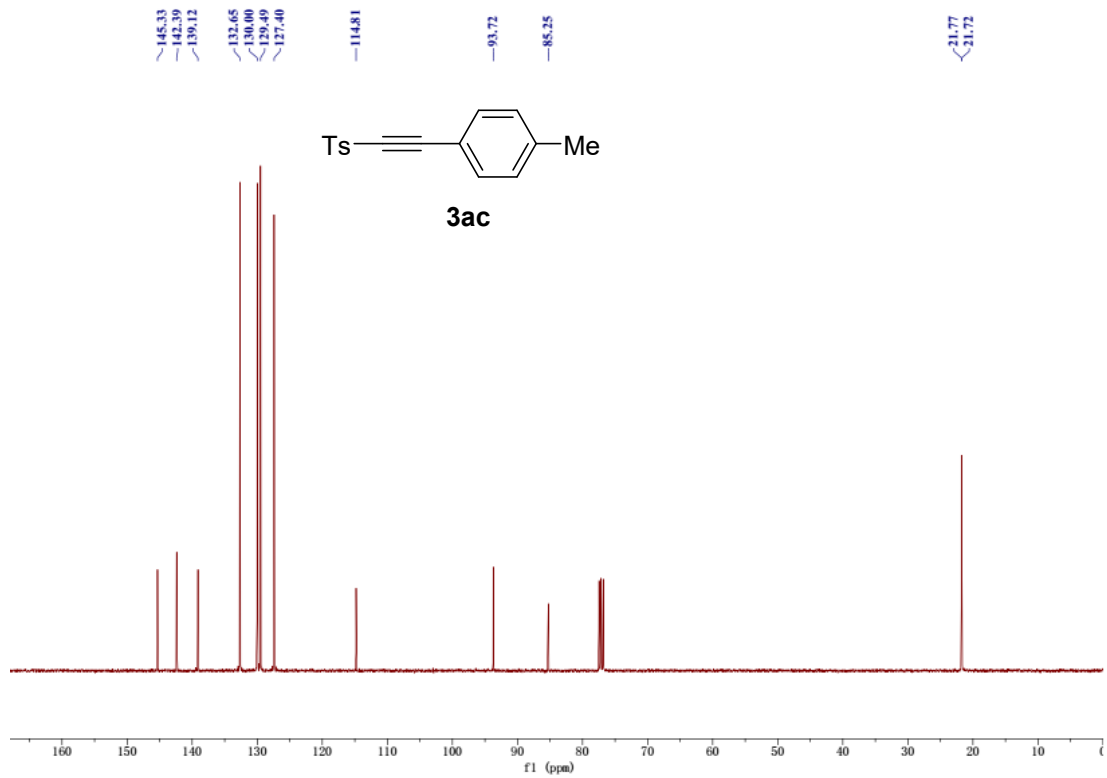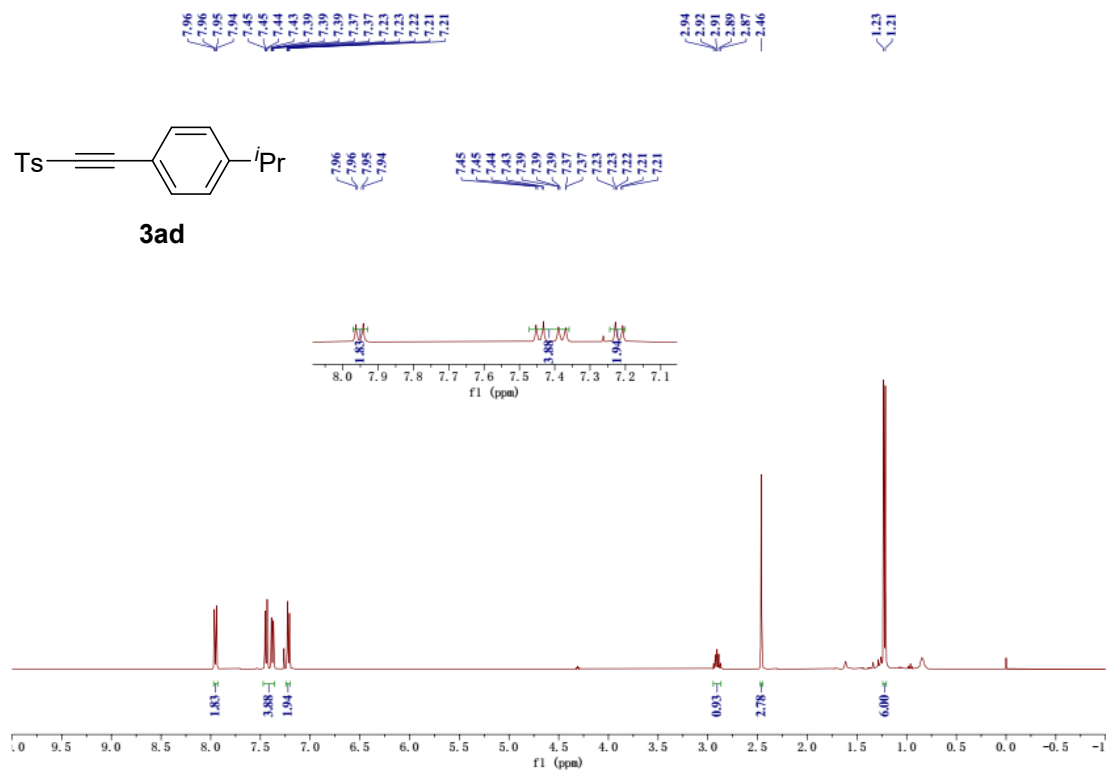

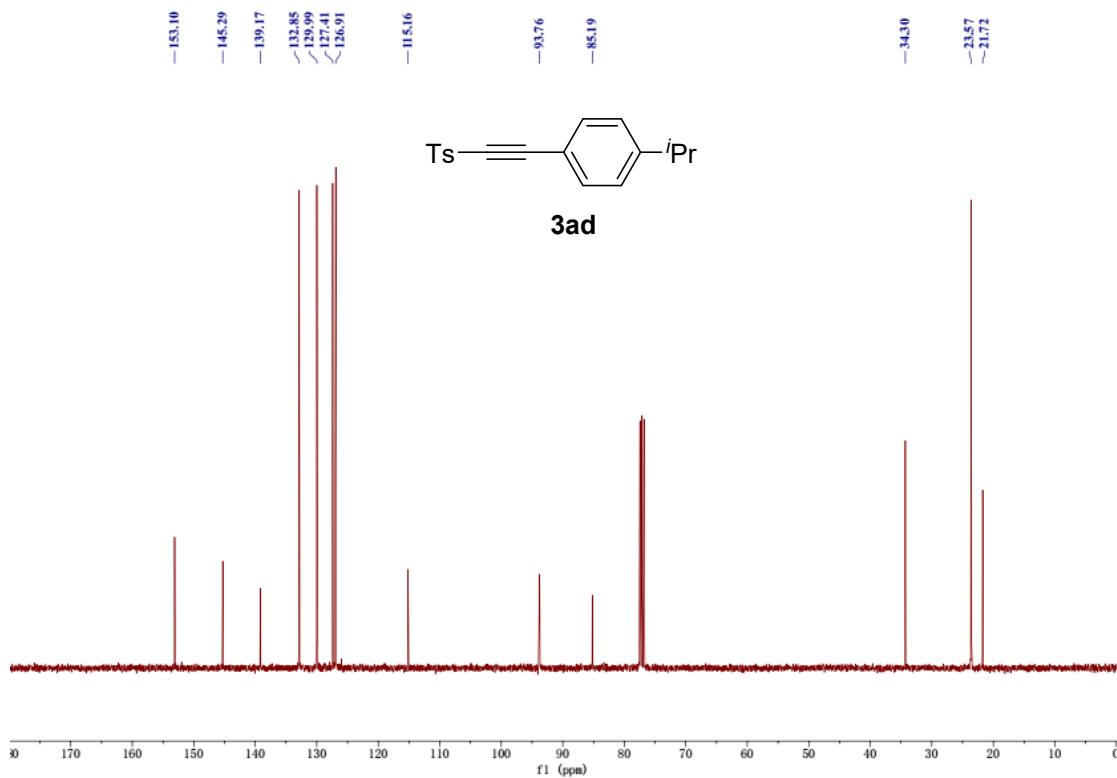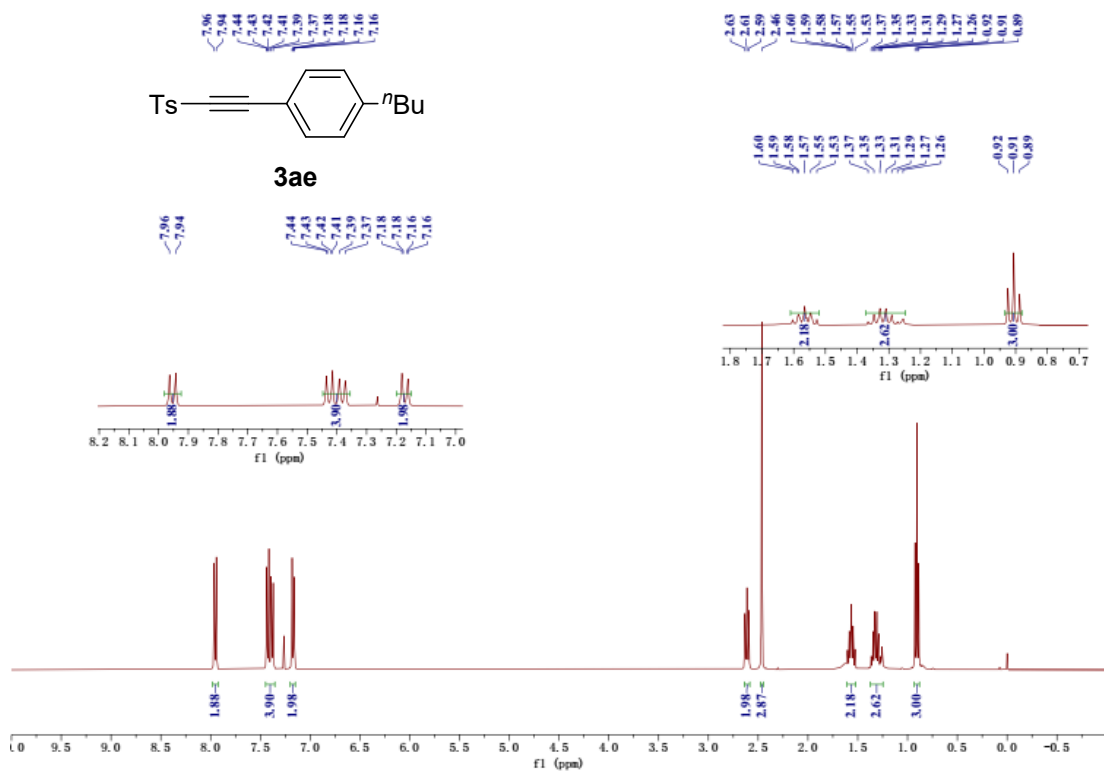

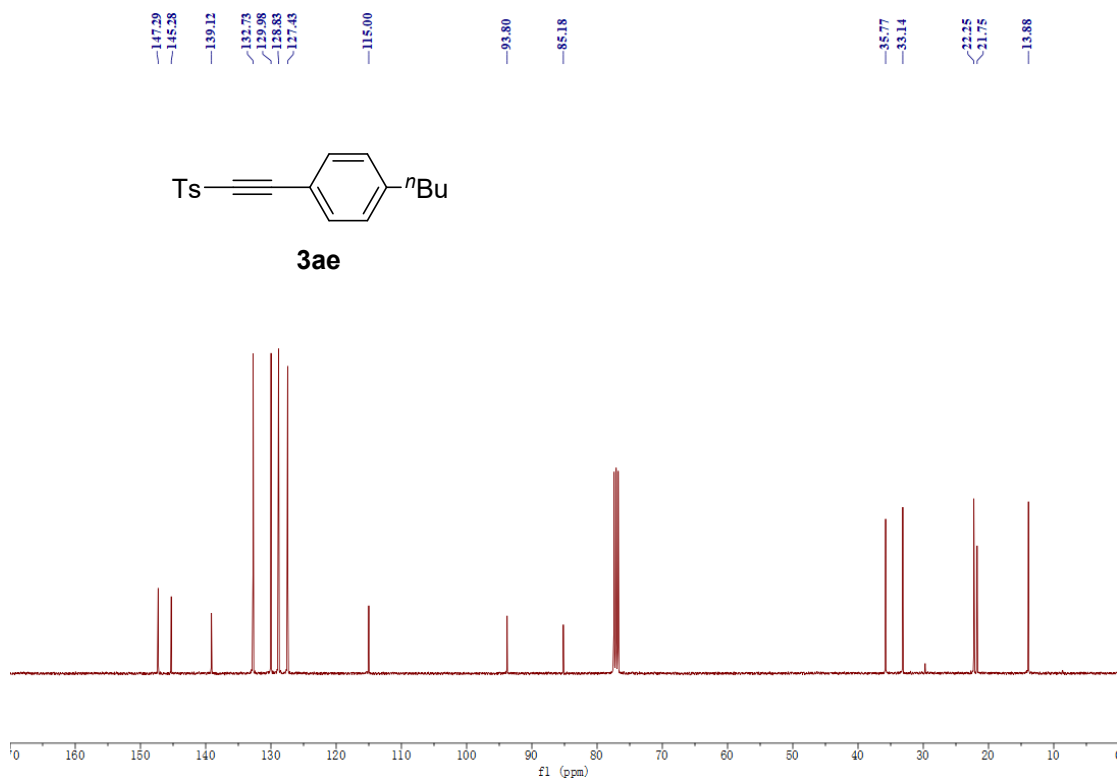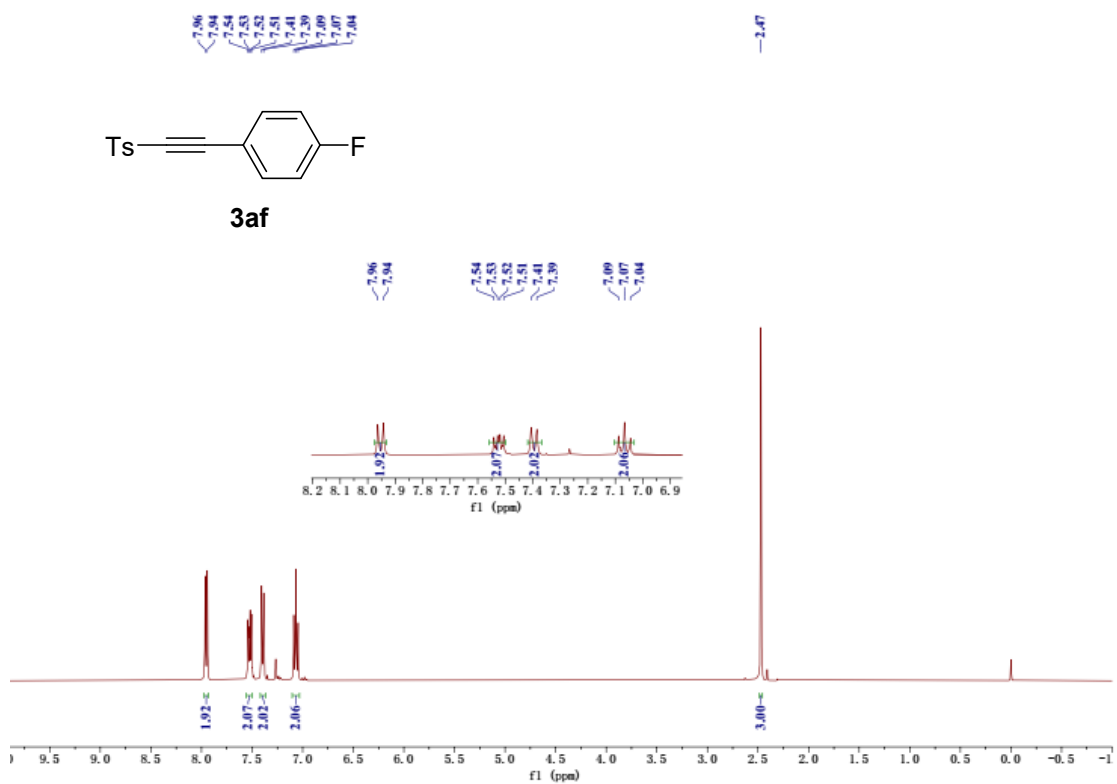

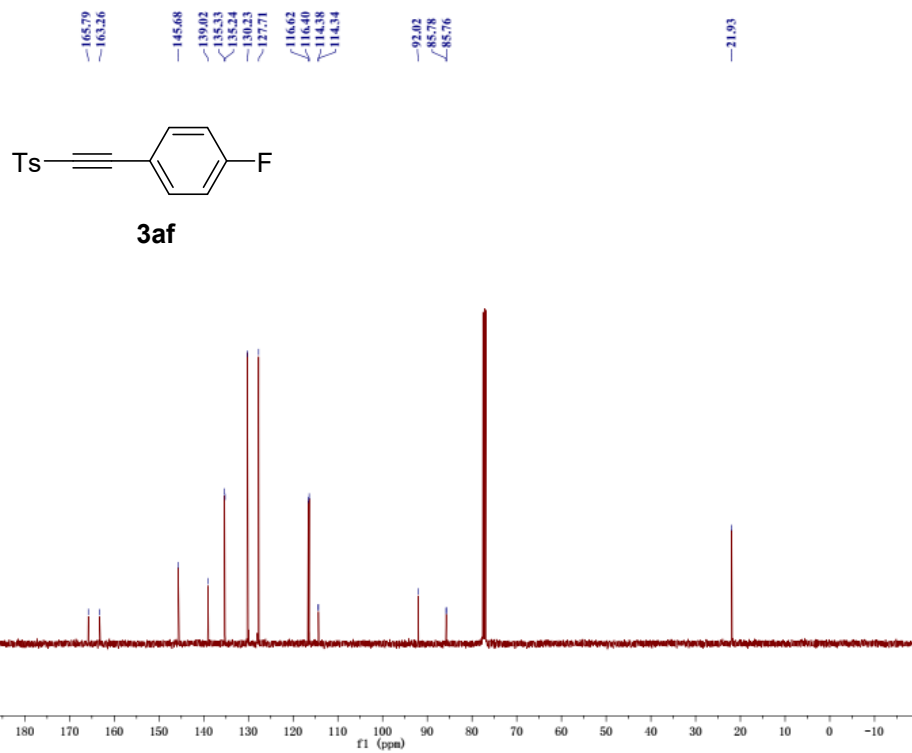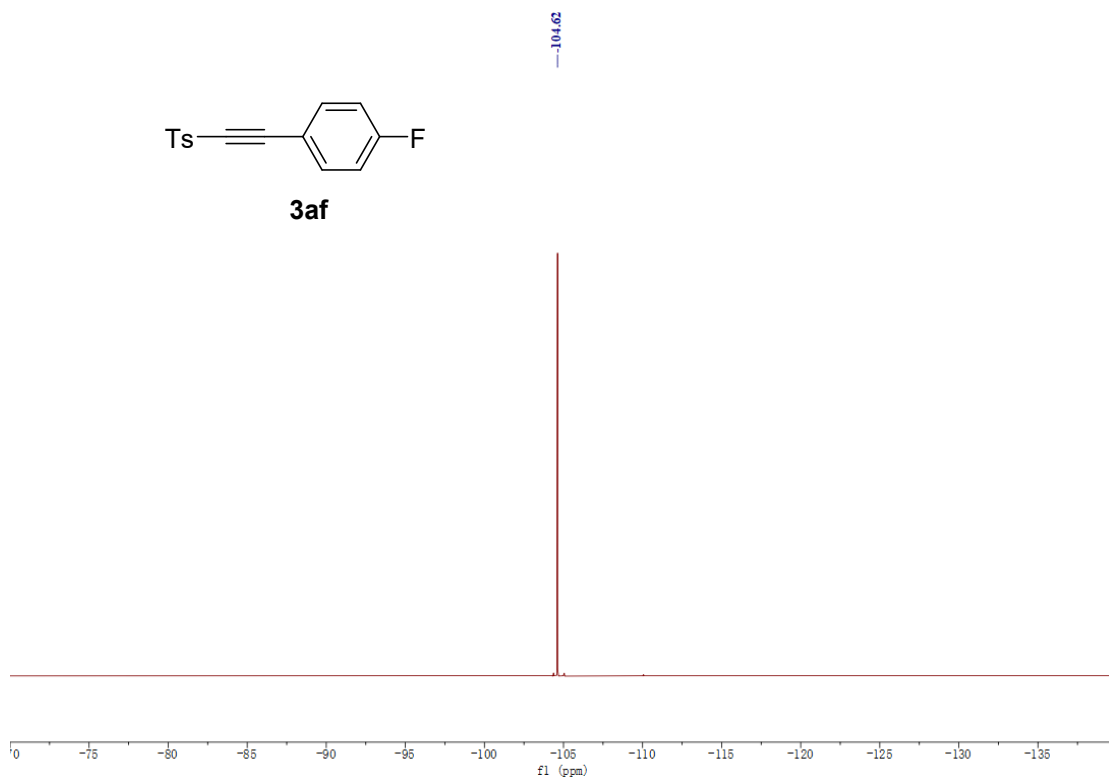

7.96  
7.94  
7.53  
7.51  
7.49  
7.38  
7.36

3.47

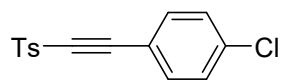

3ag

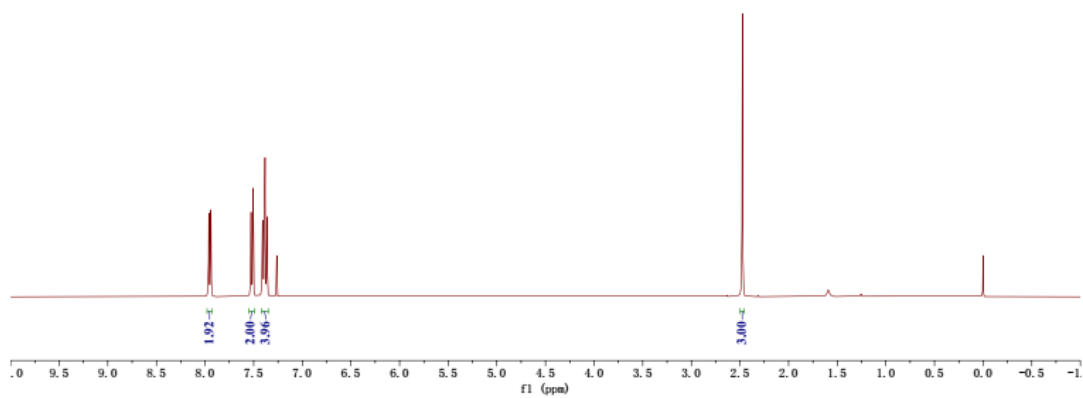

145.58  
138.73  
138.01  
133.91  
130.07  
129.20  
127.59

116.51

91.53

86.48

21.76

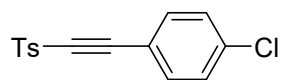

3ag

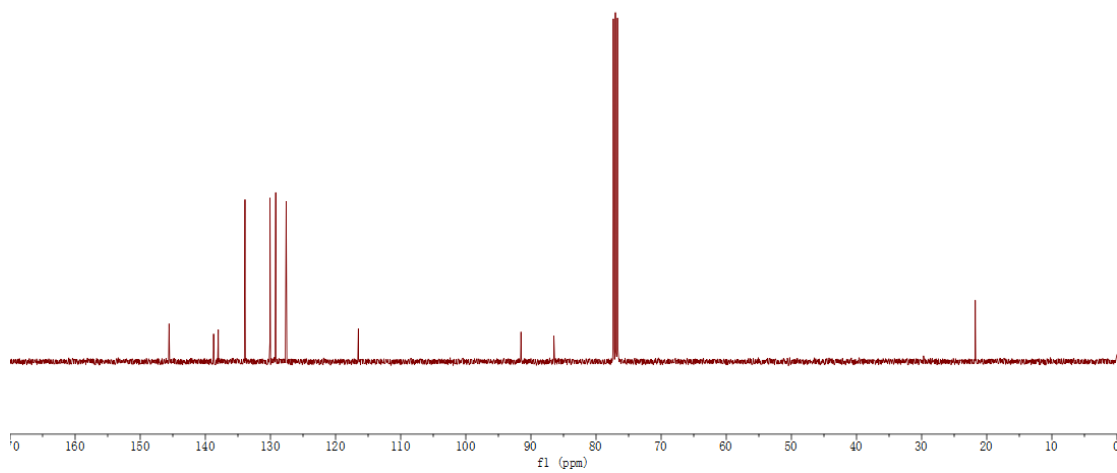



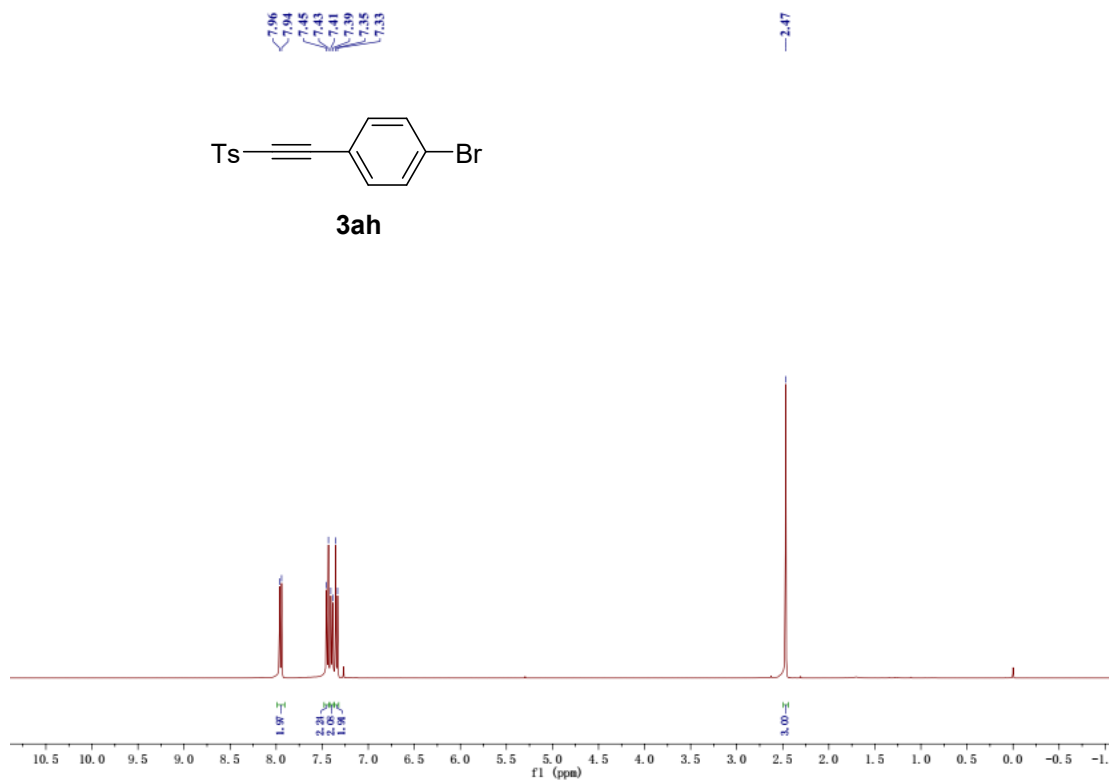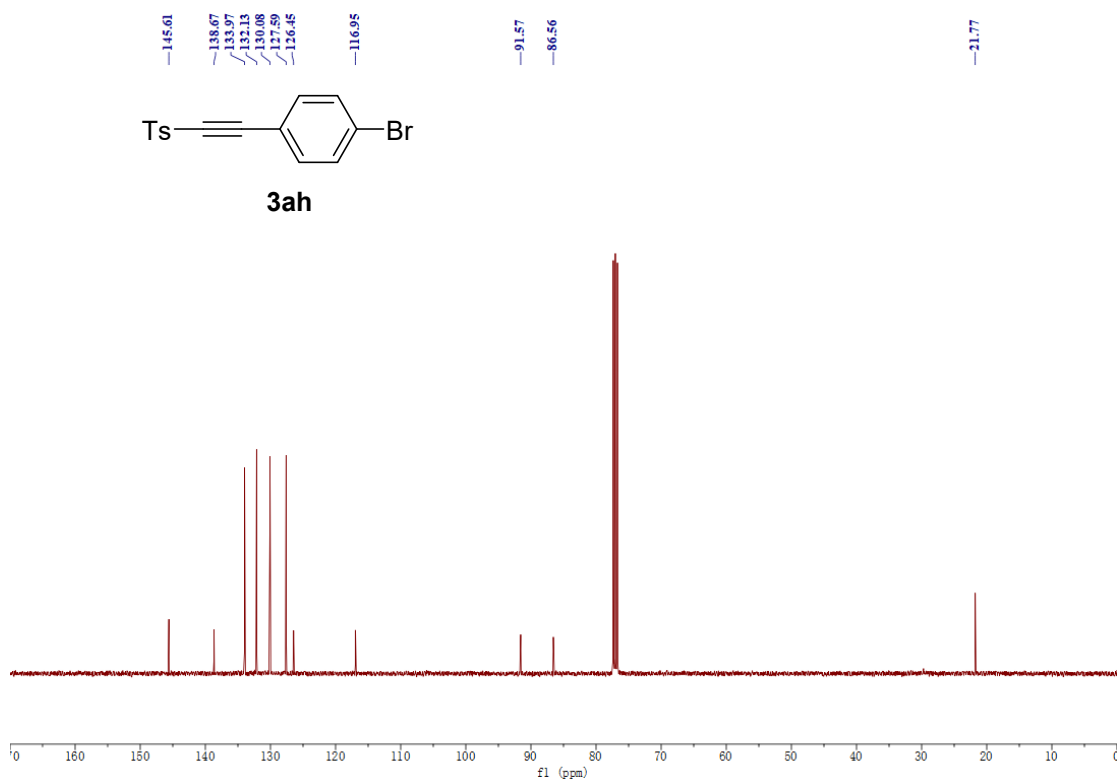

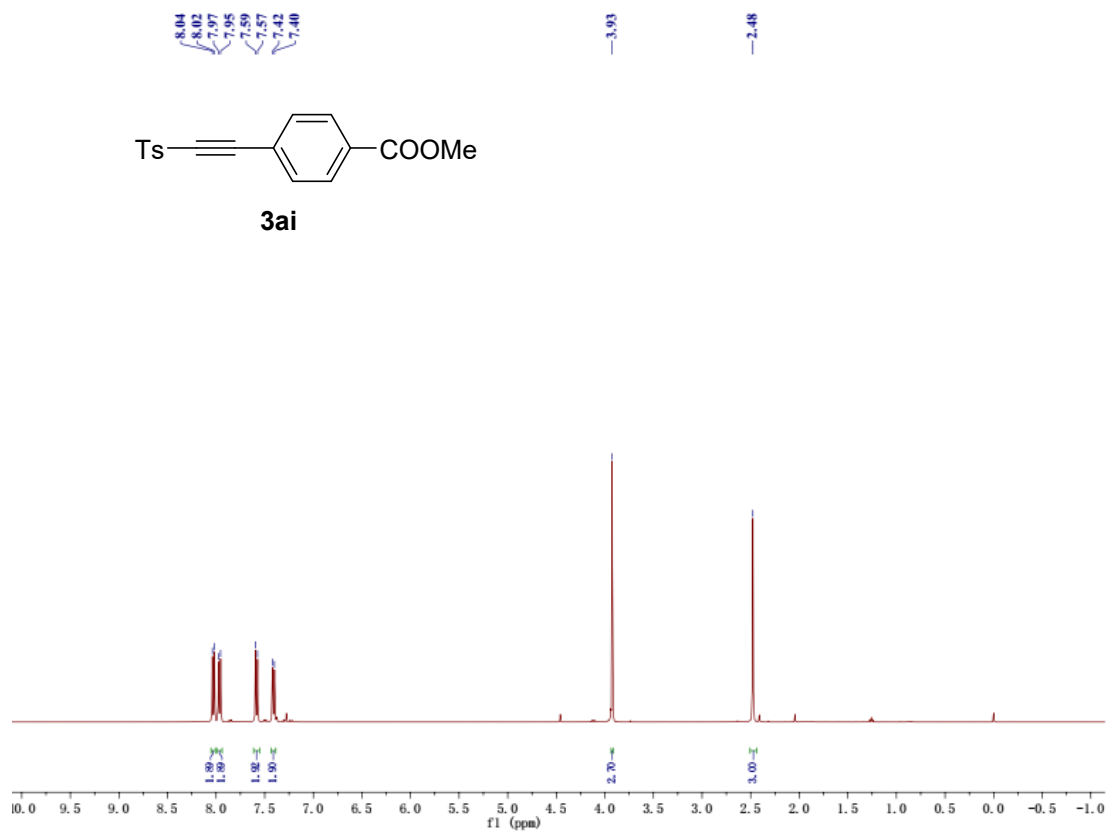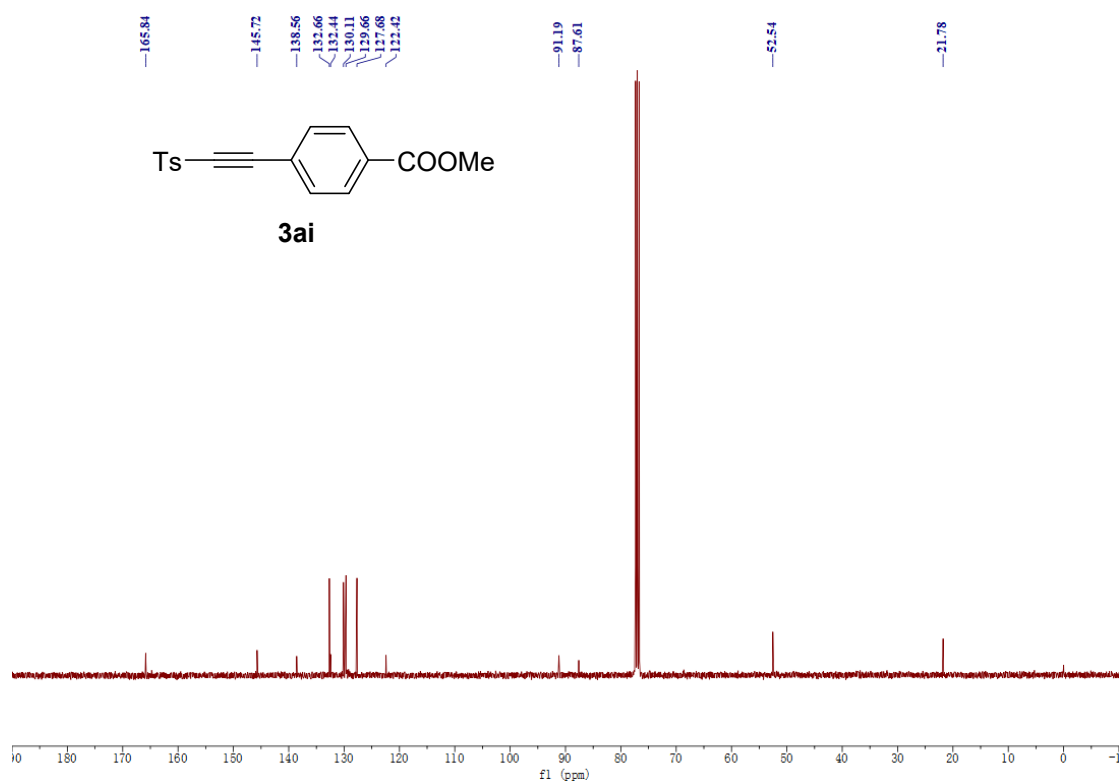

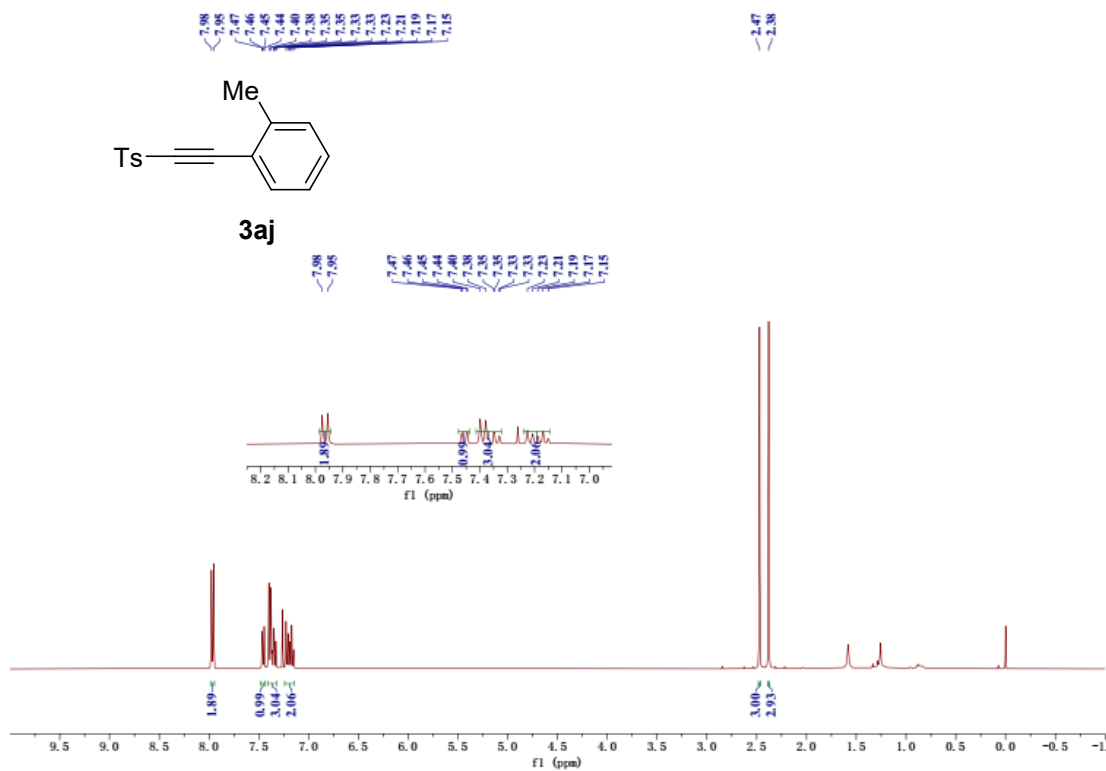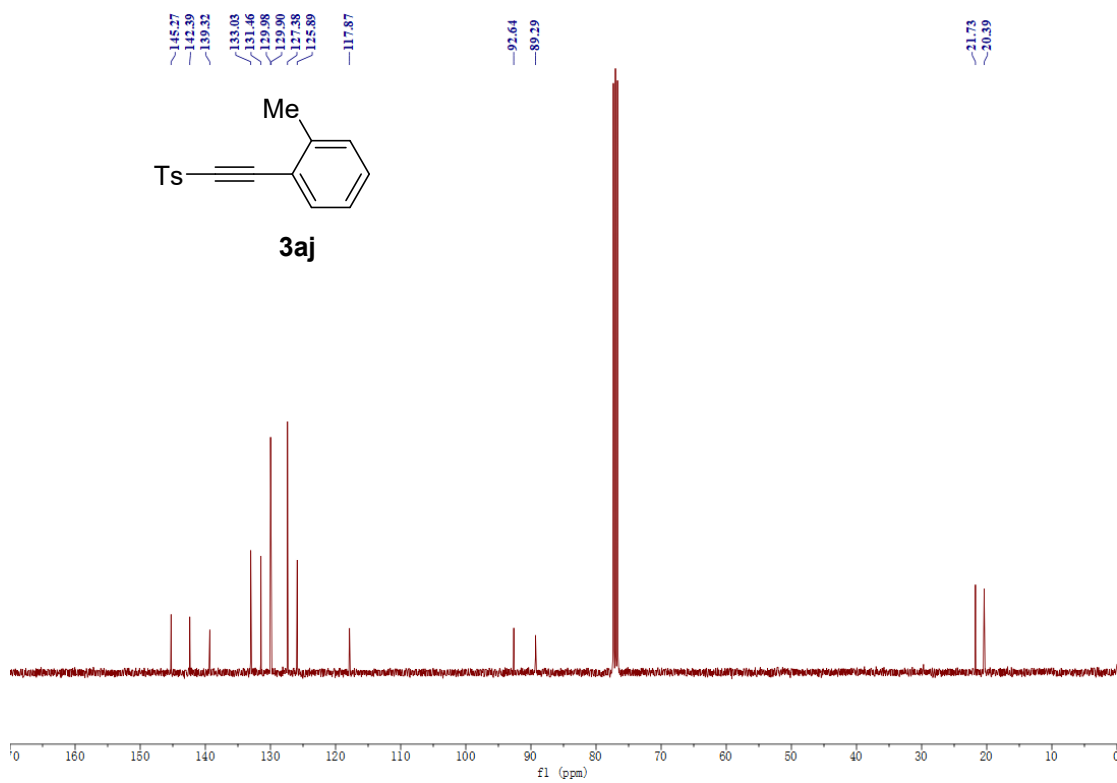

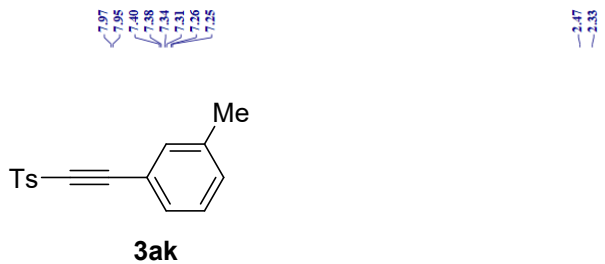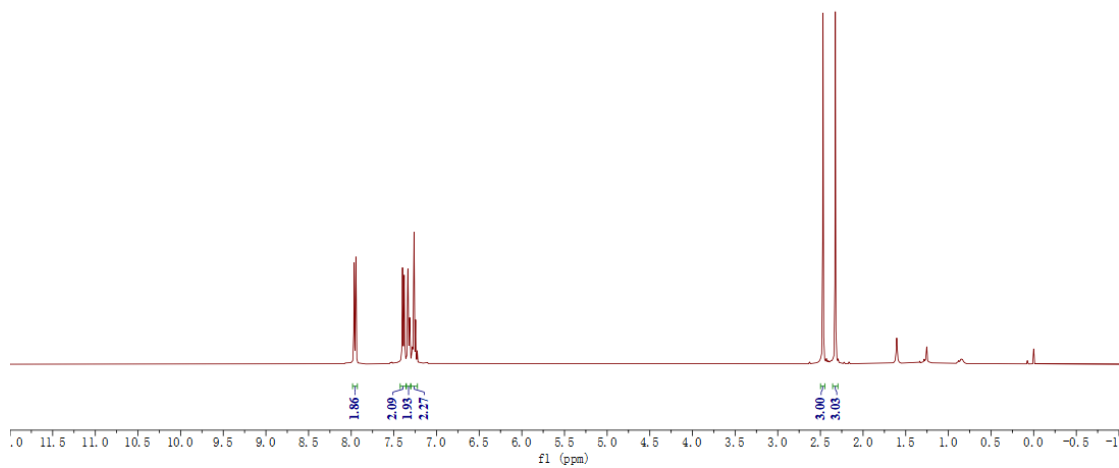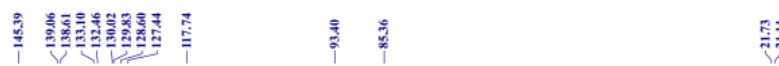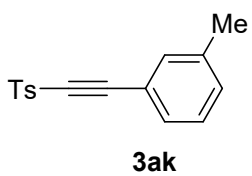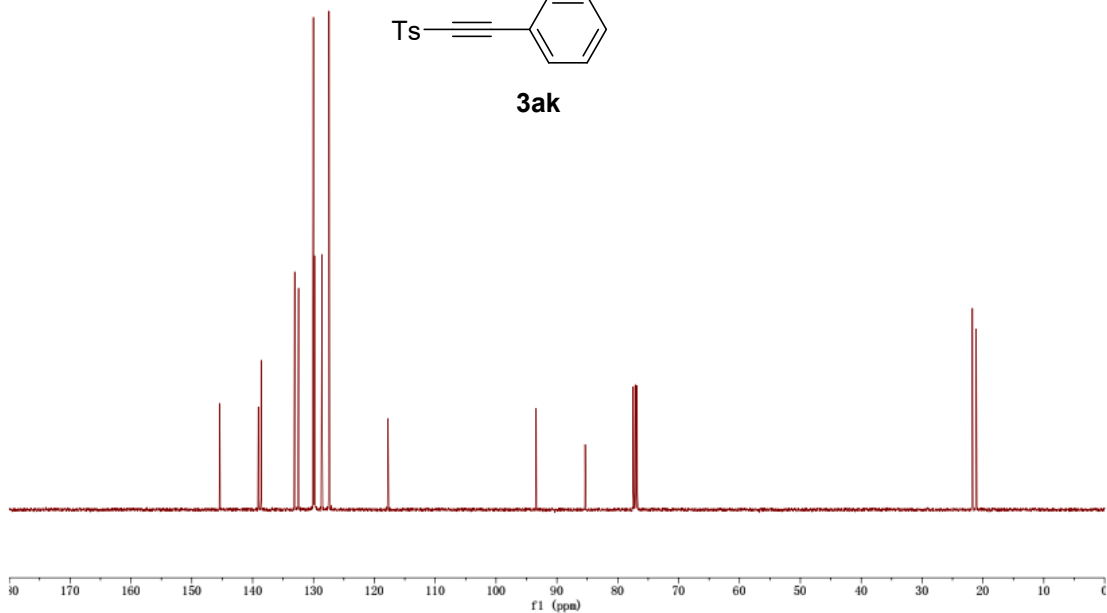

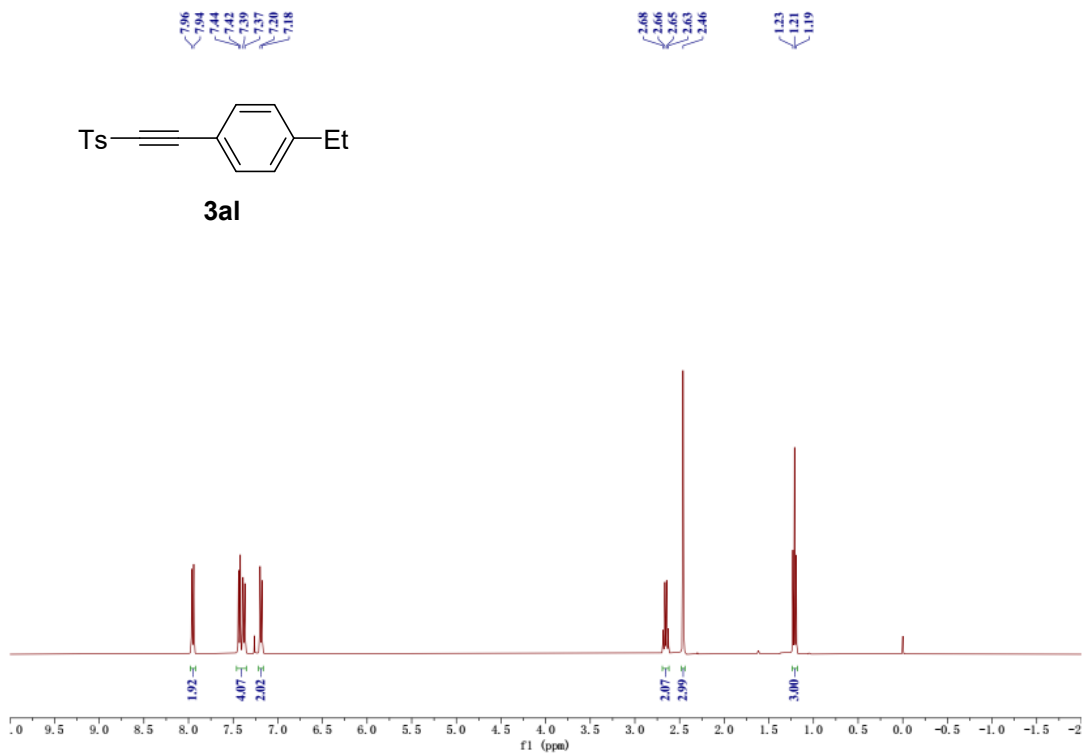

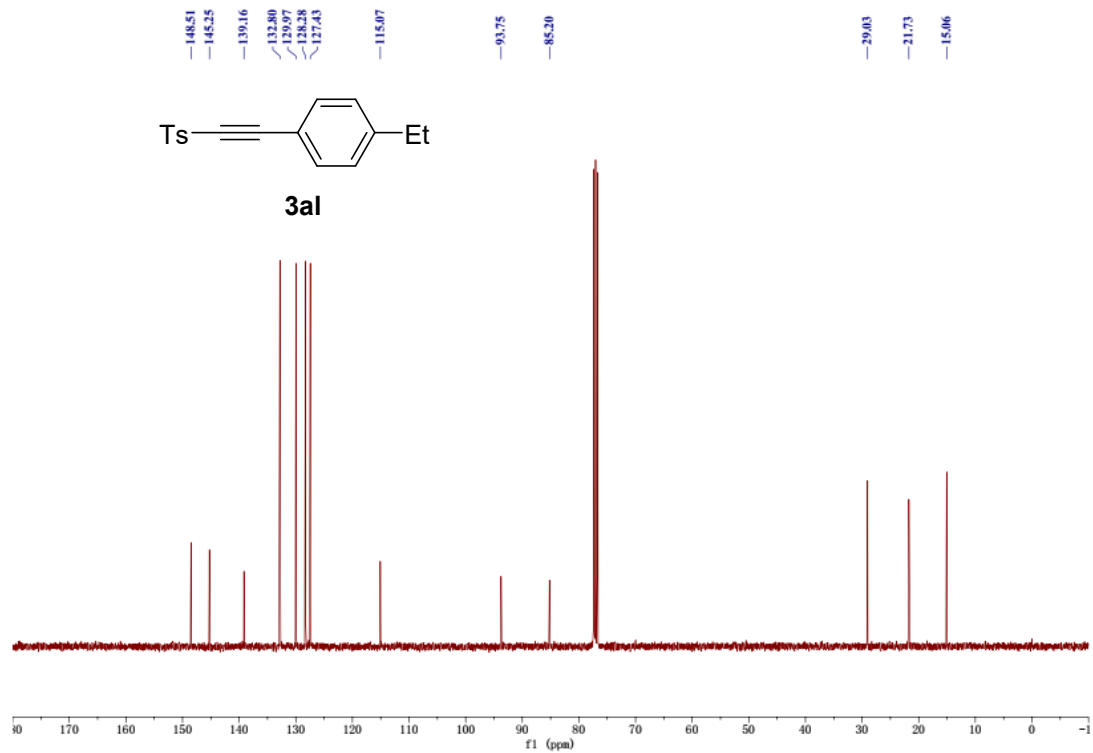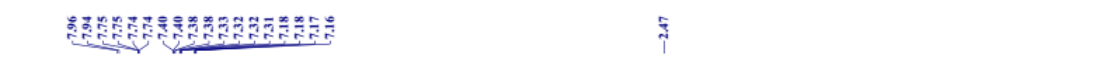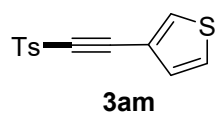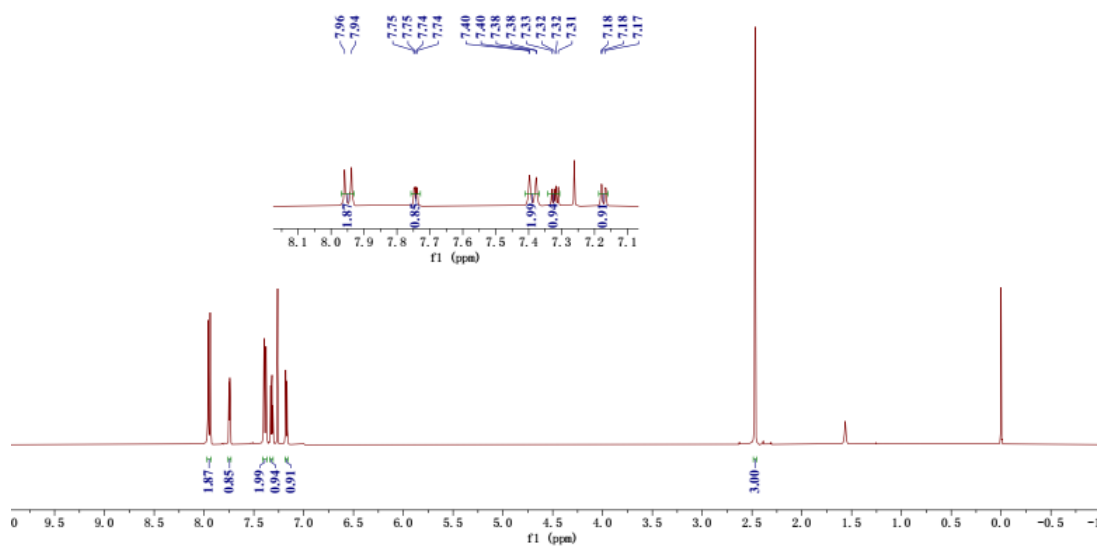

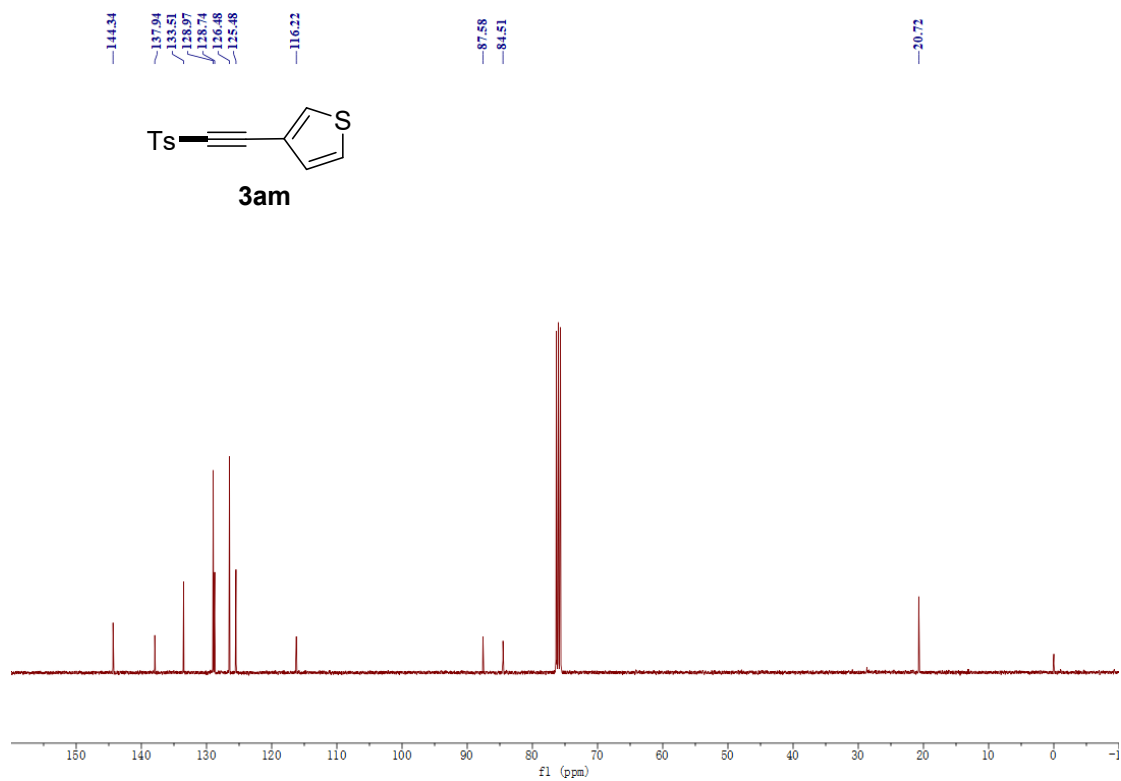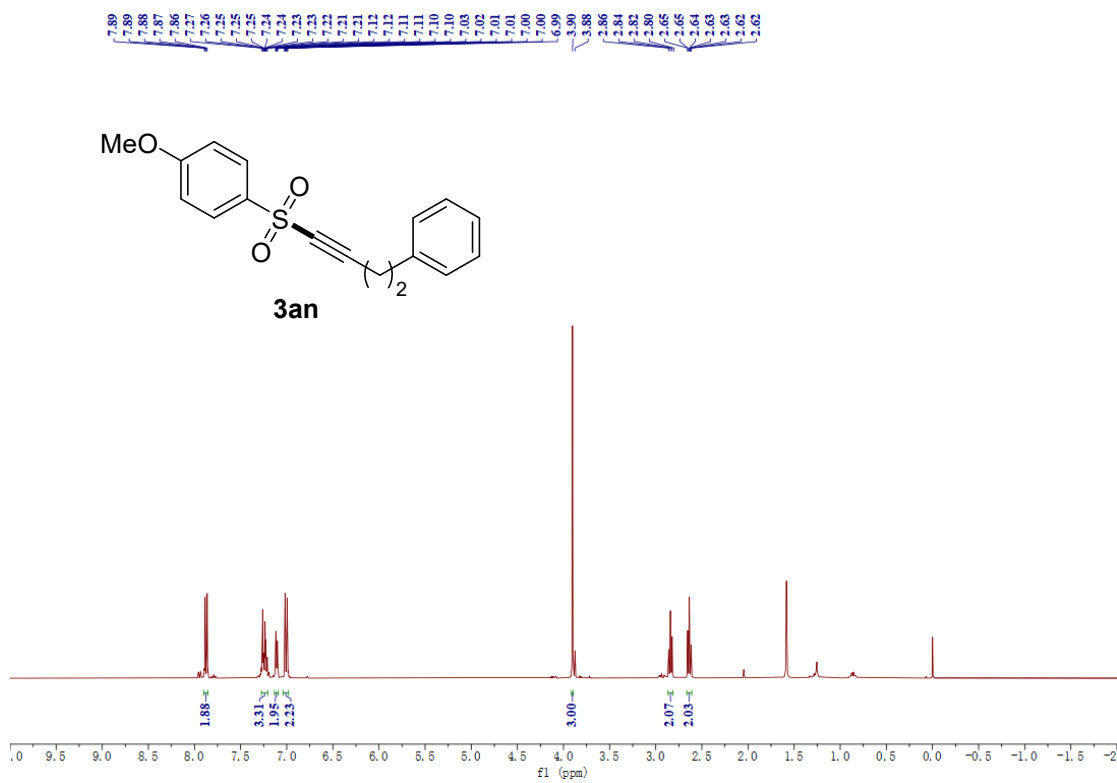

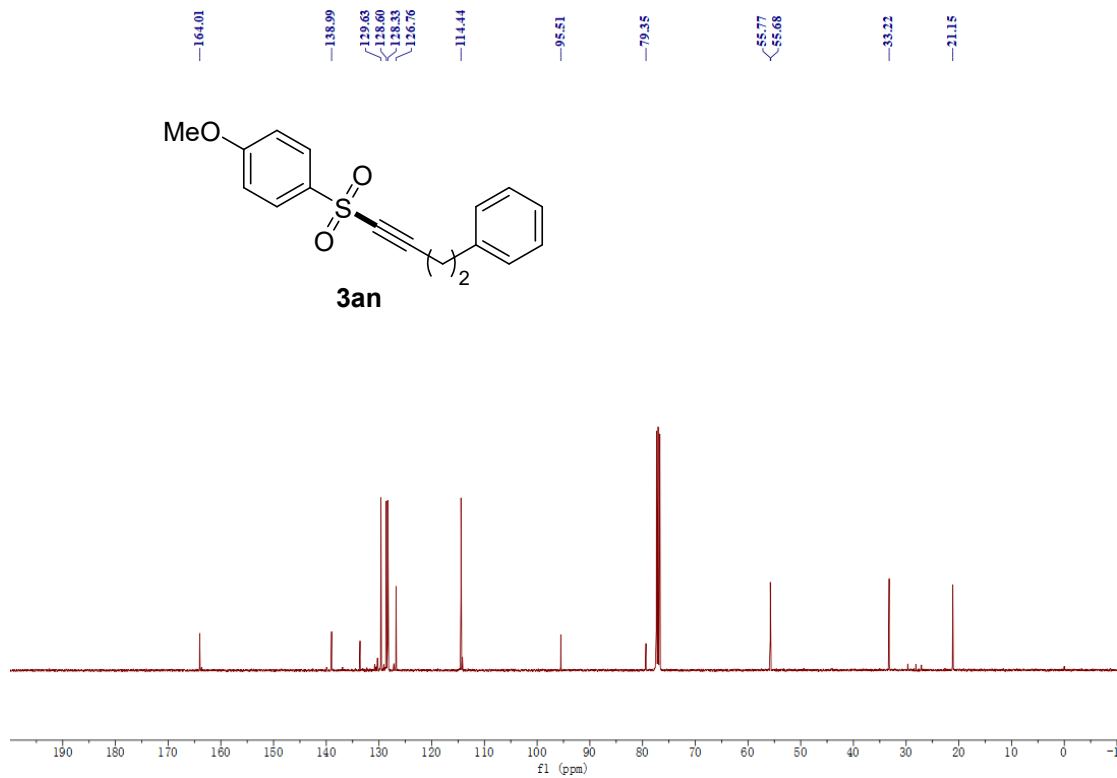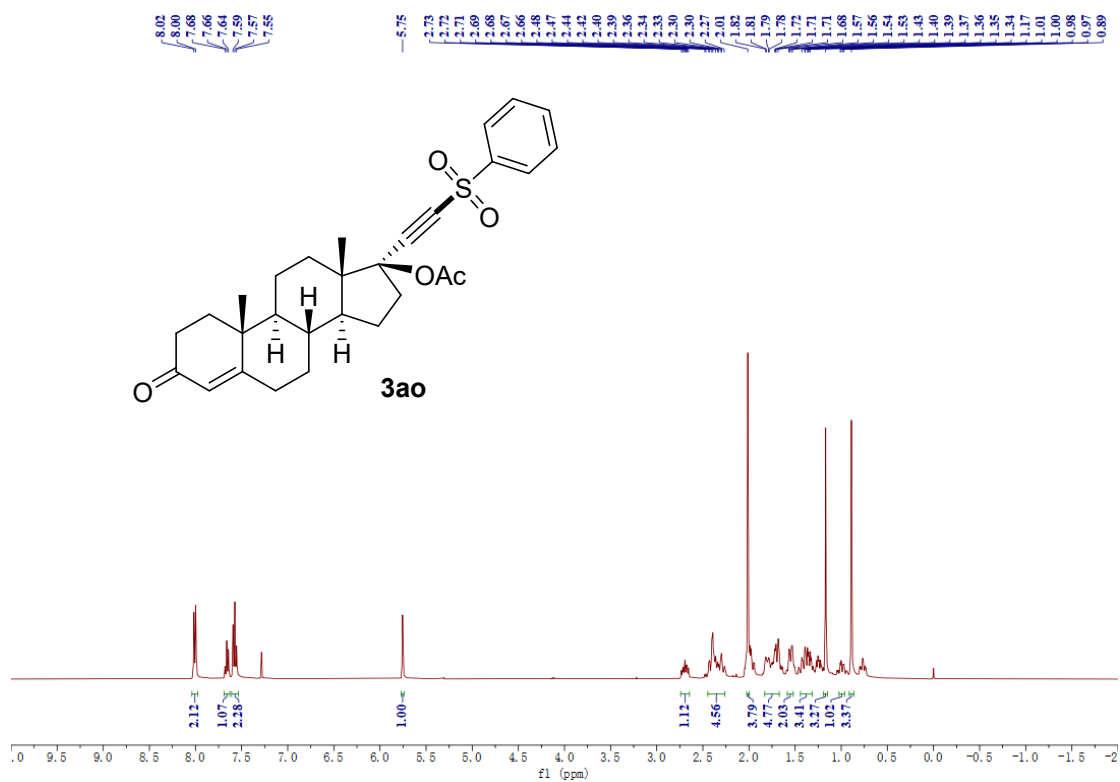



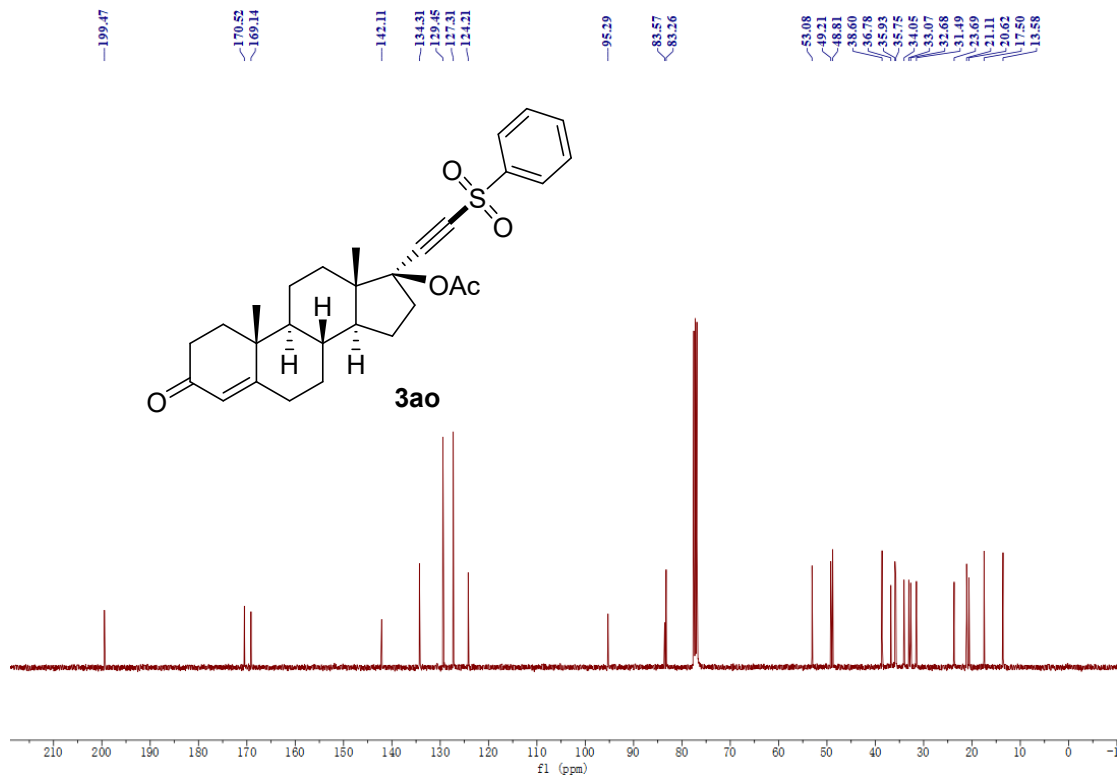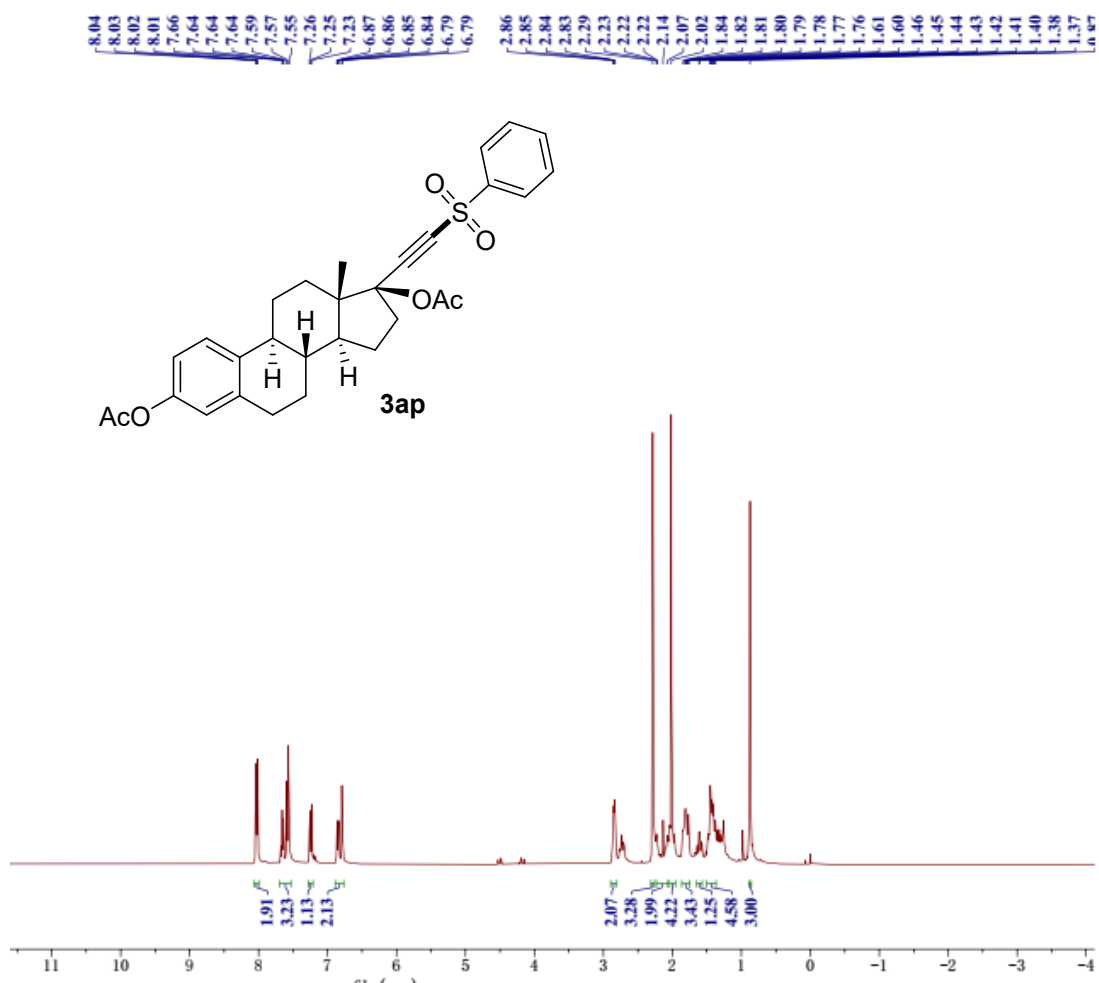

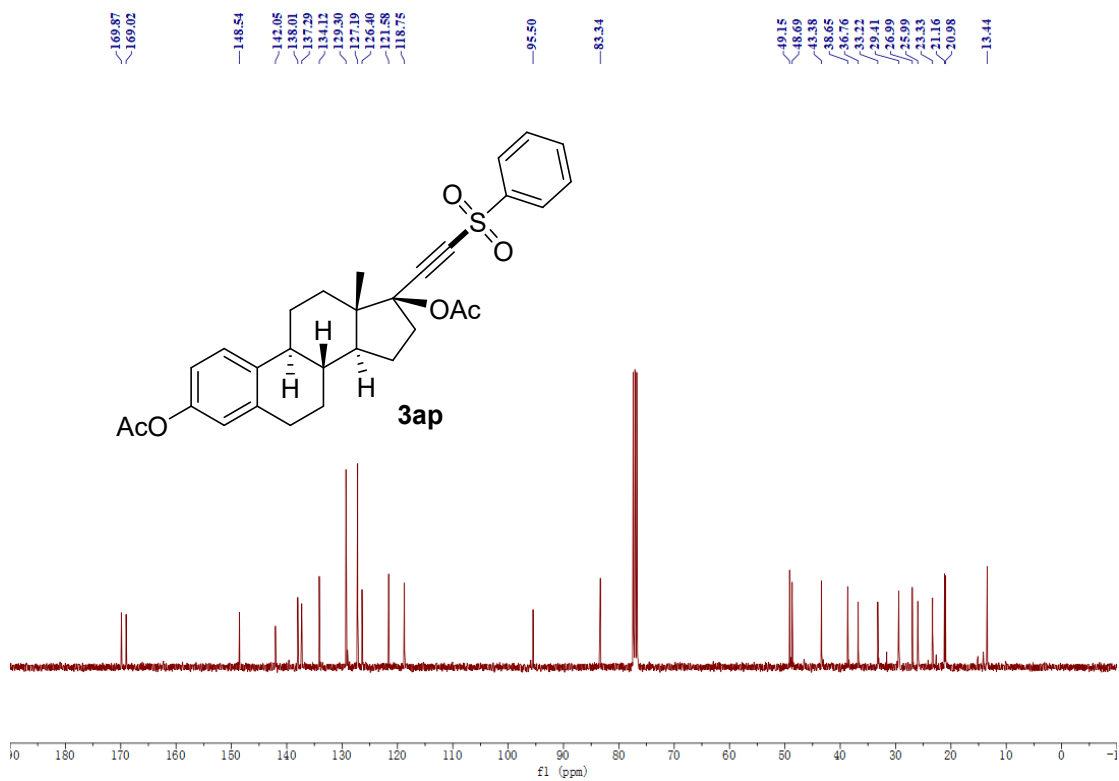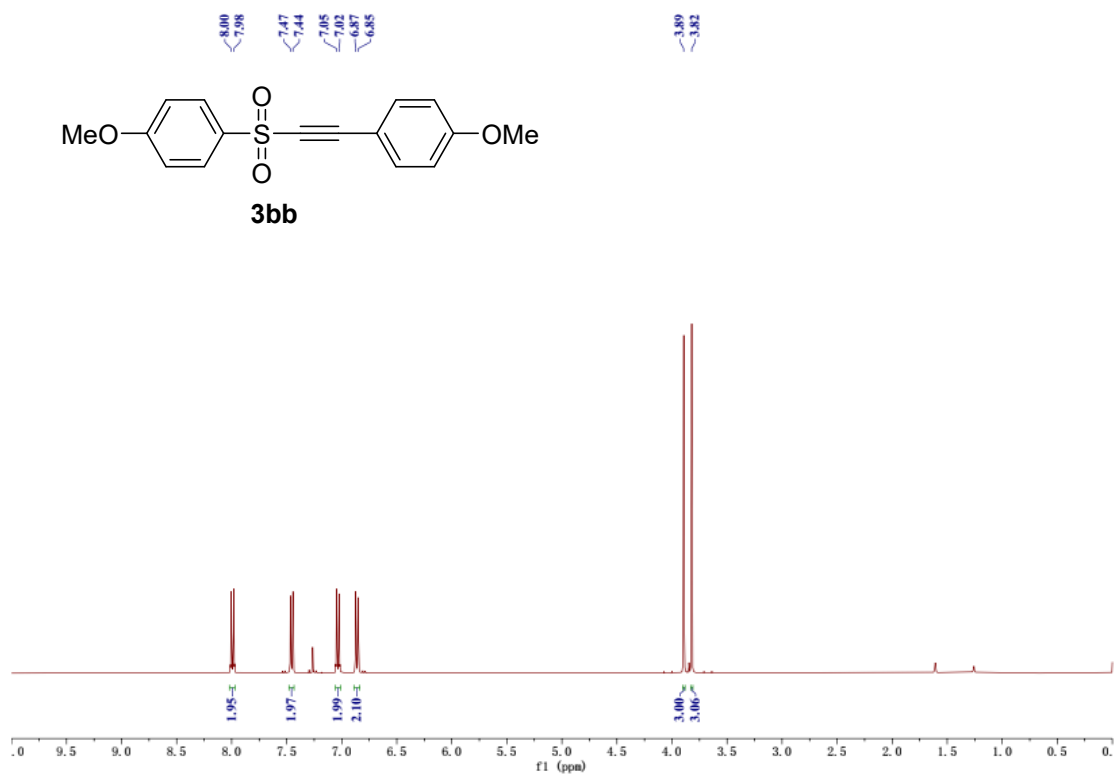

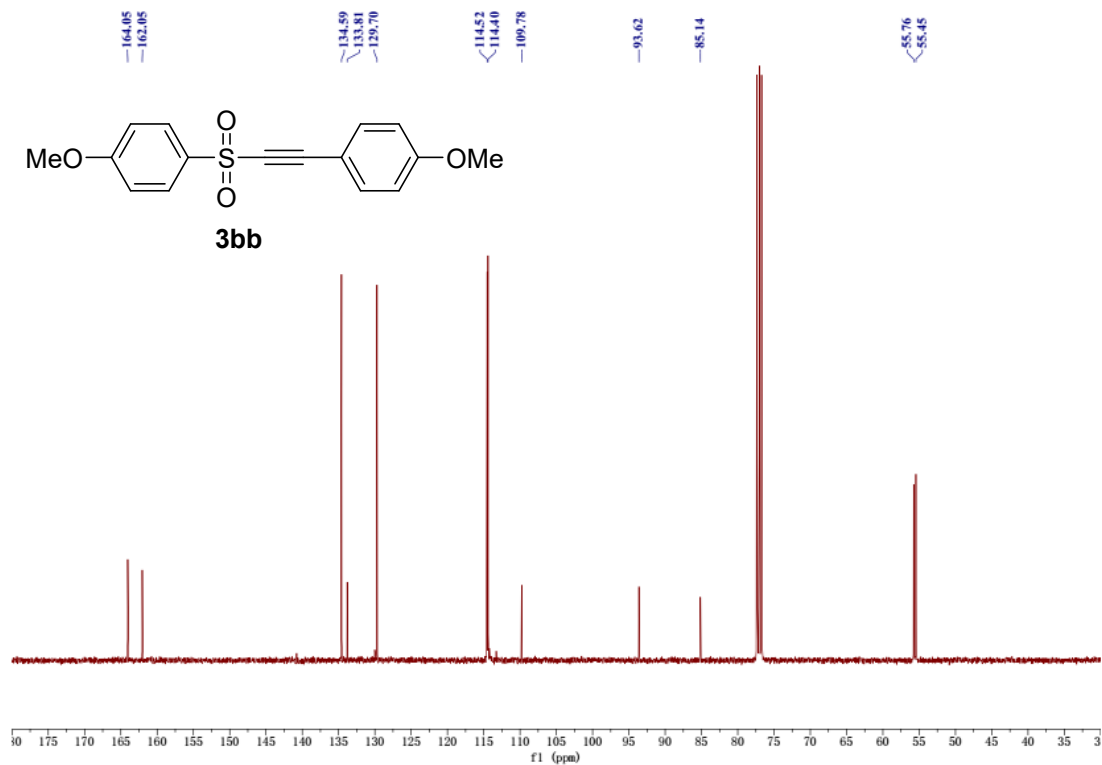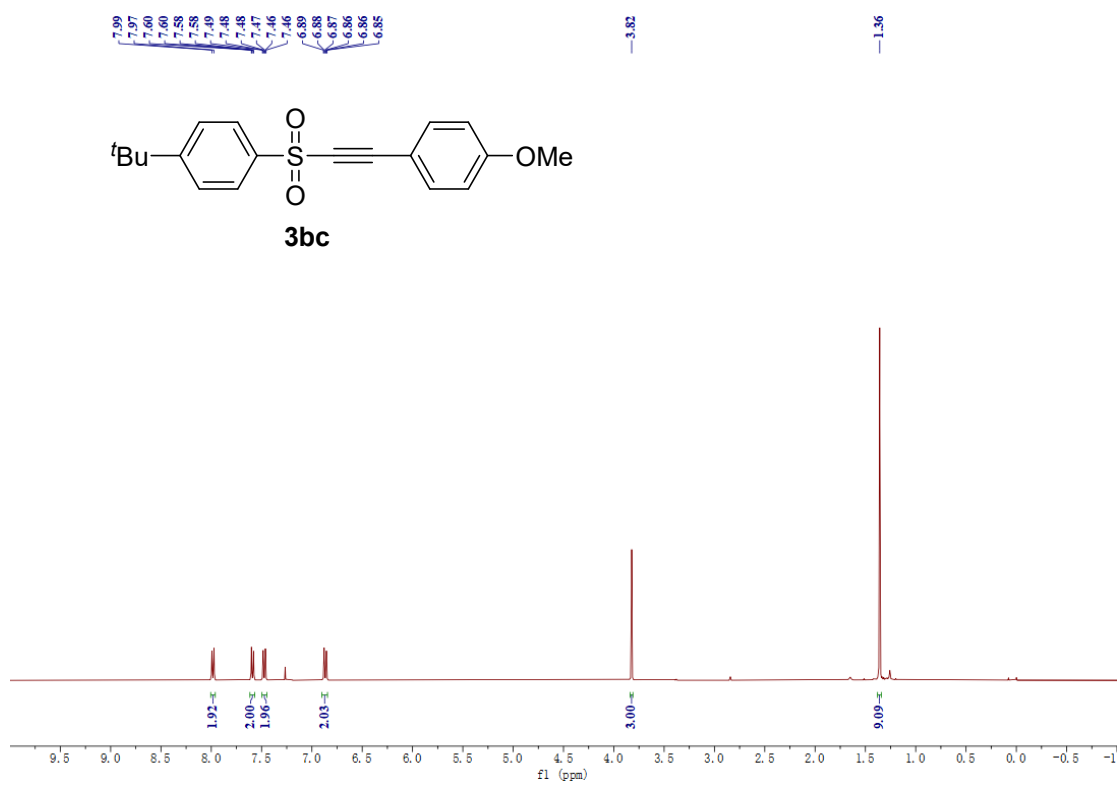

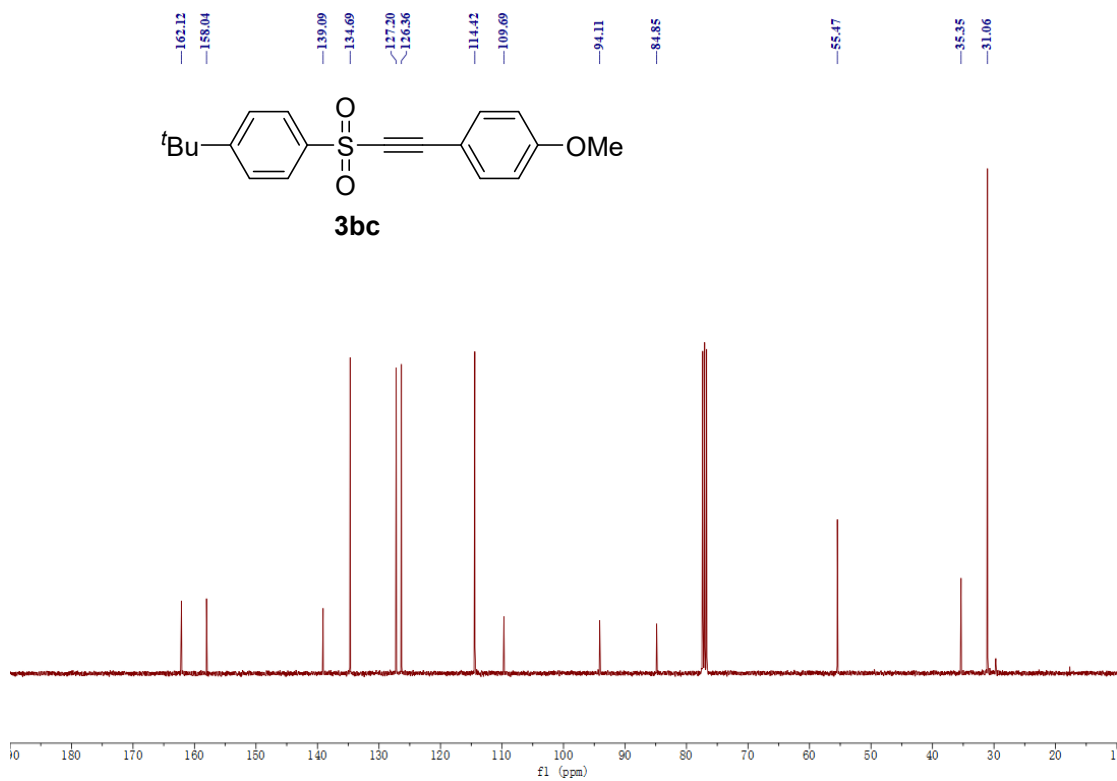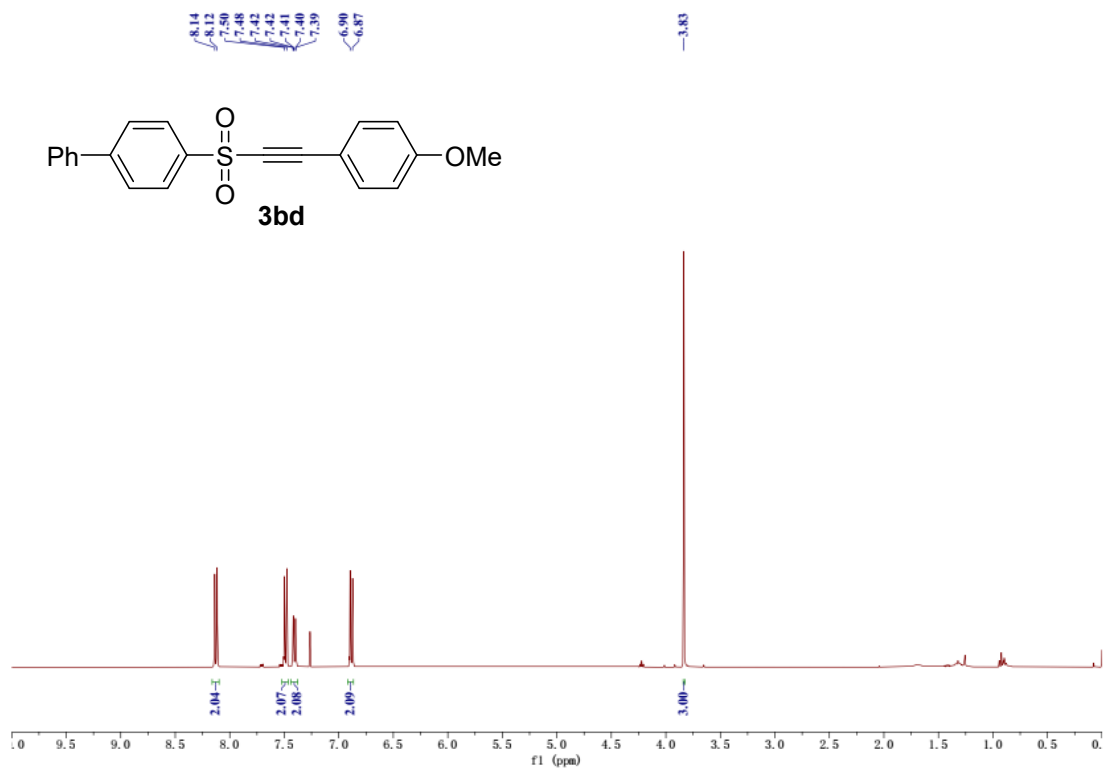

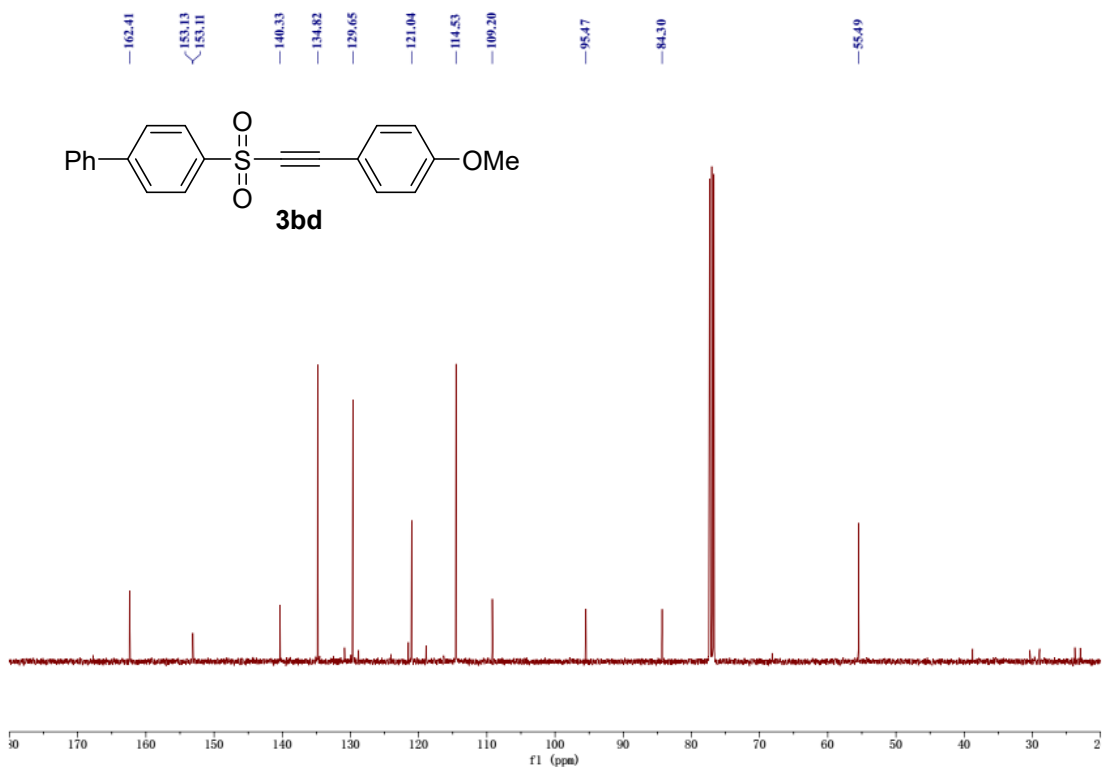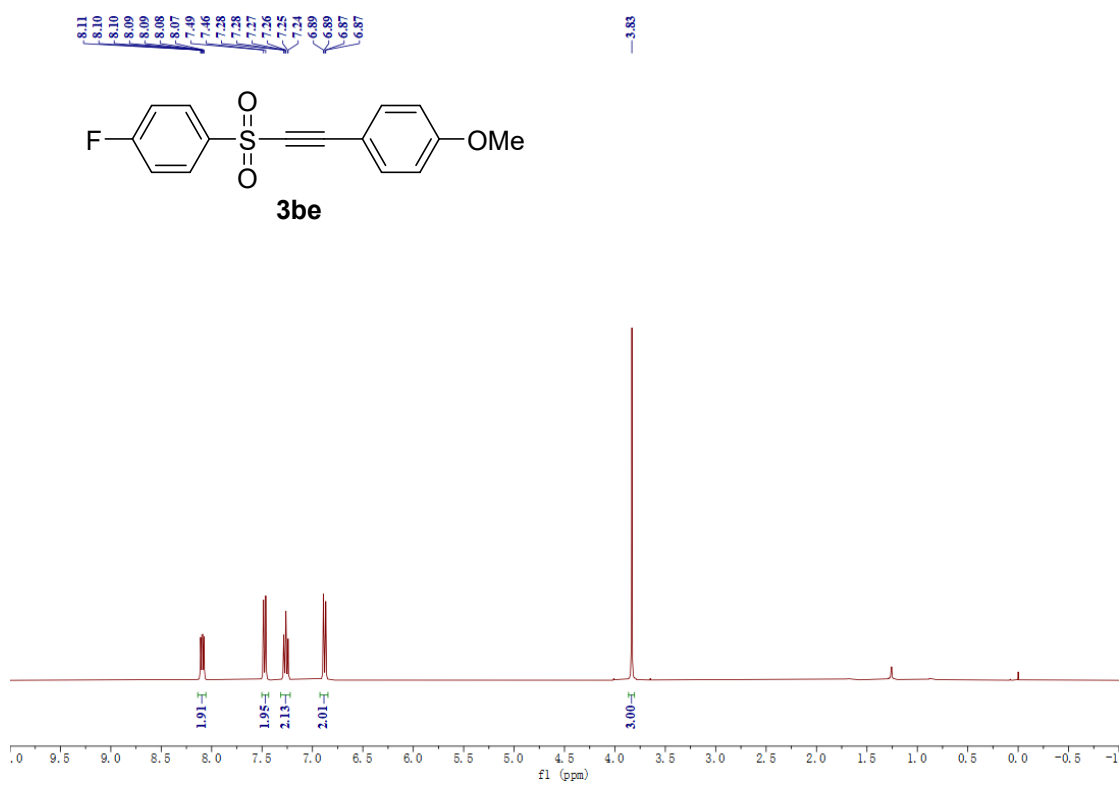

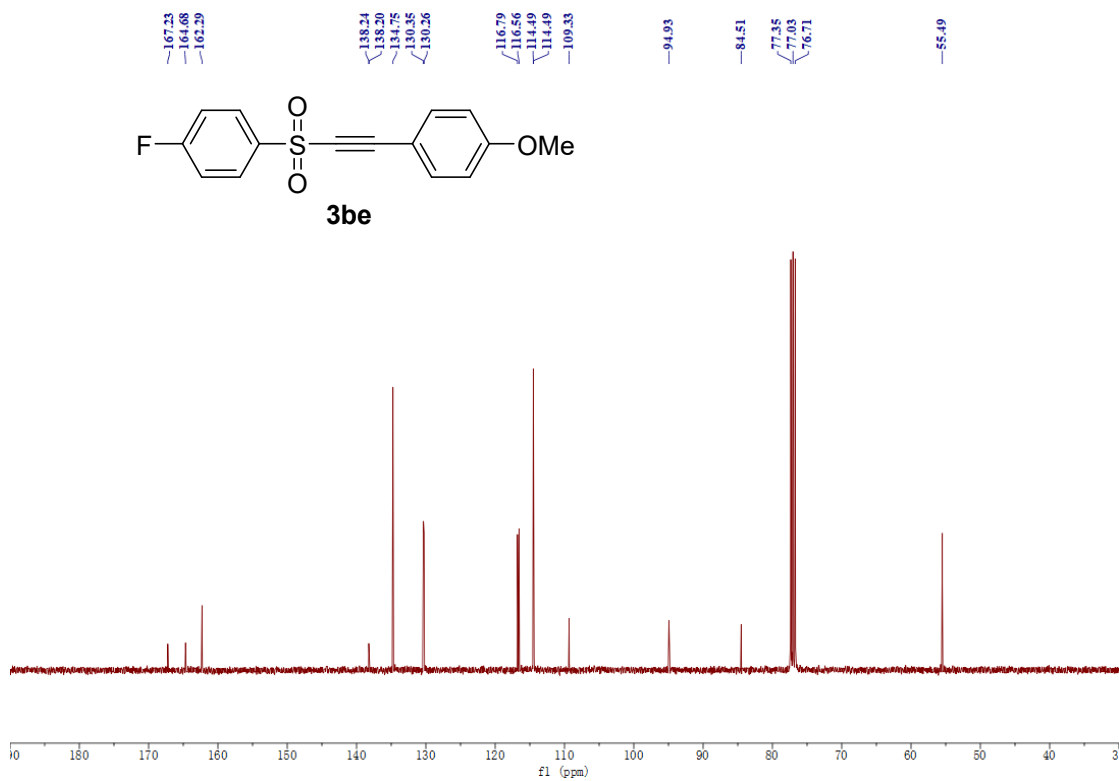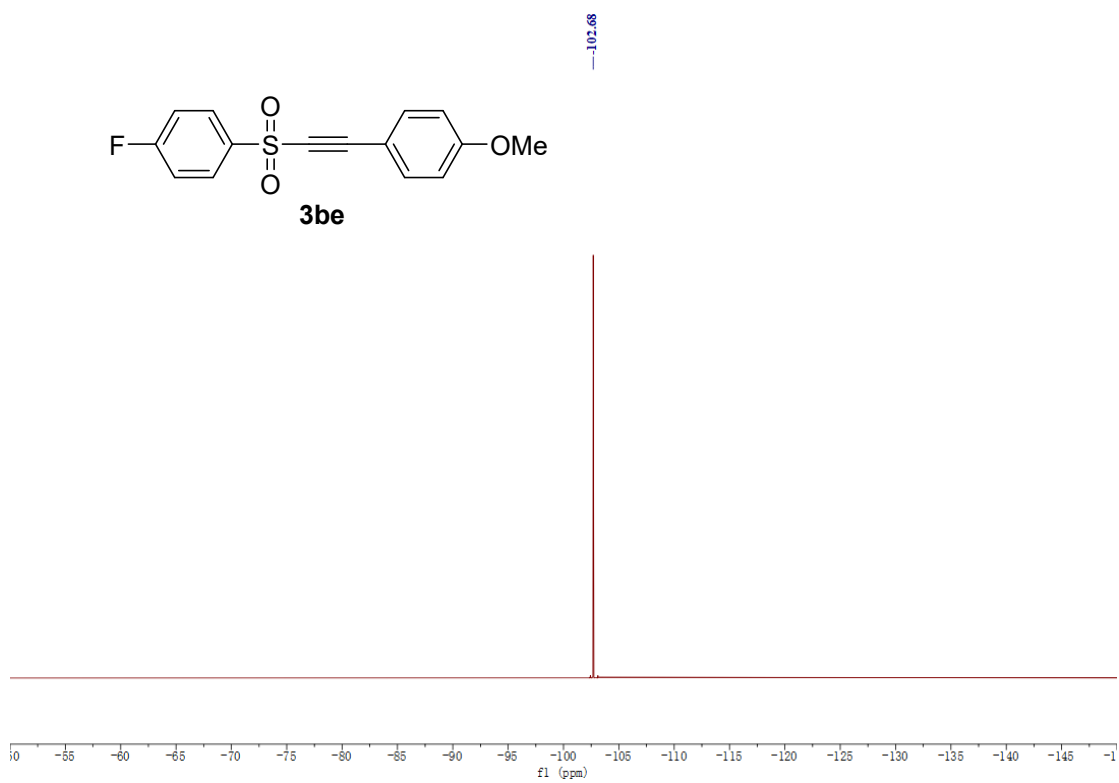

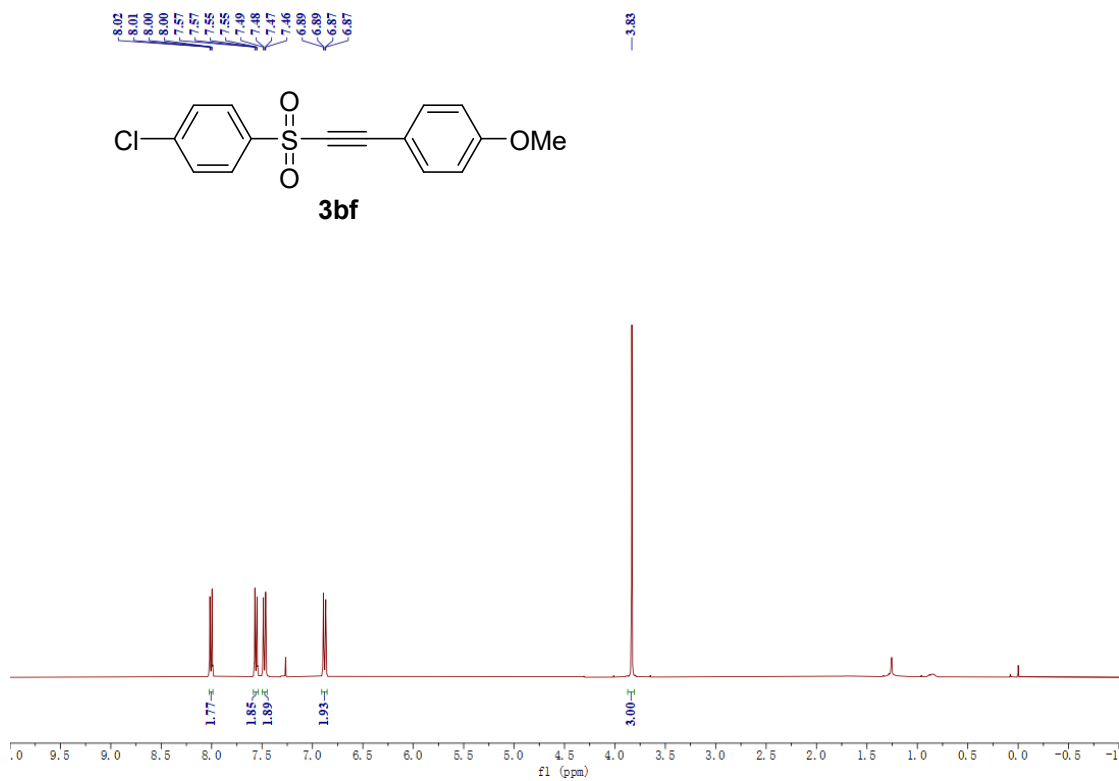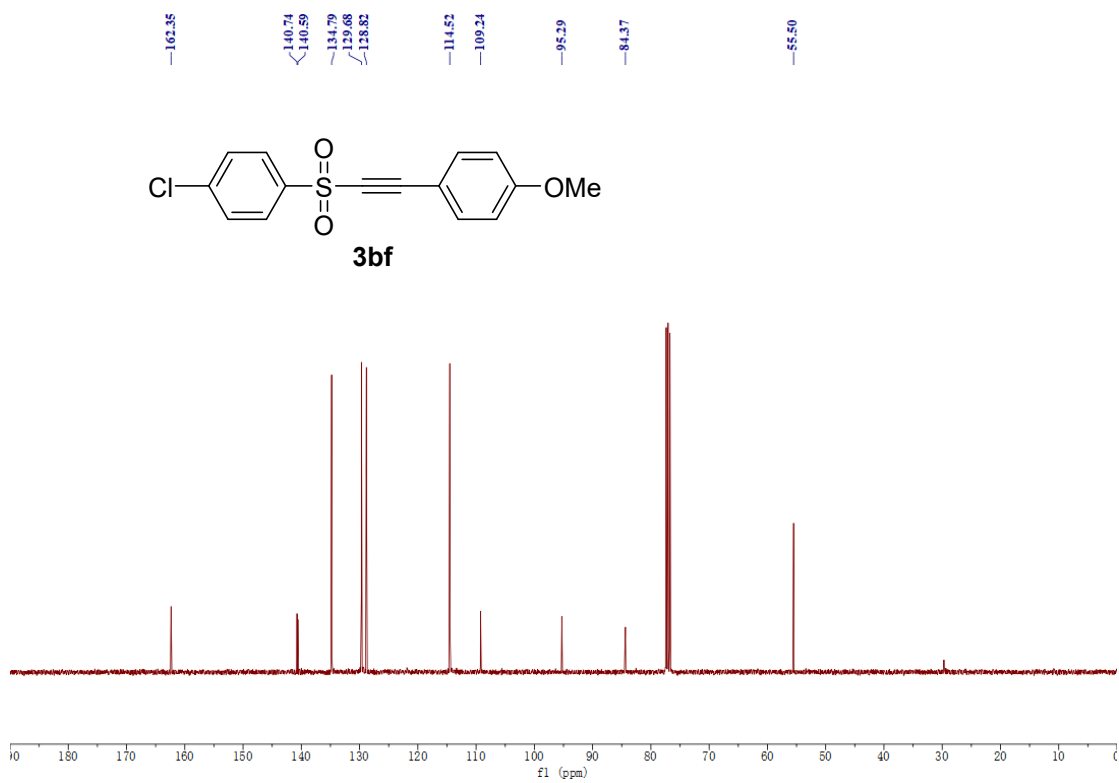

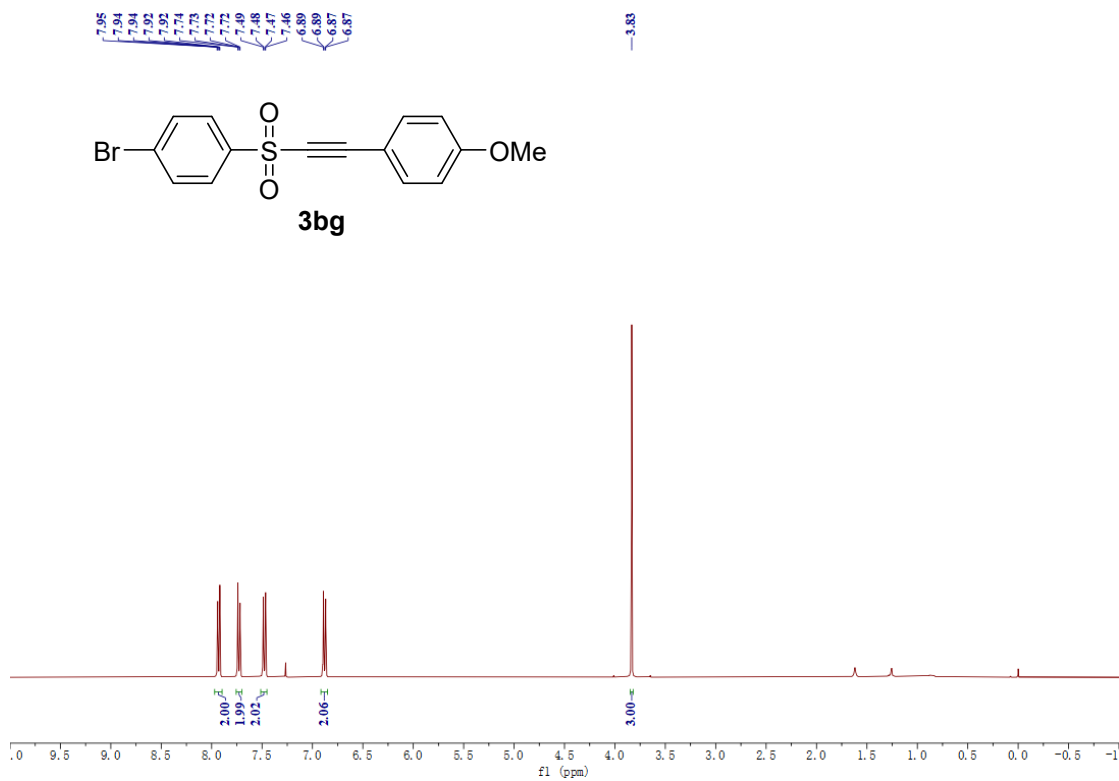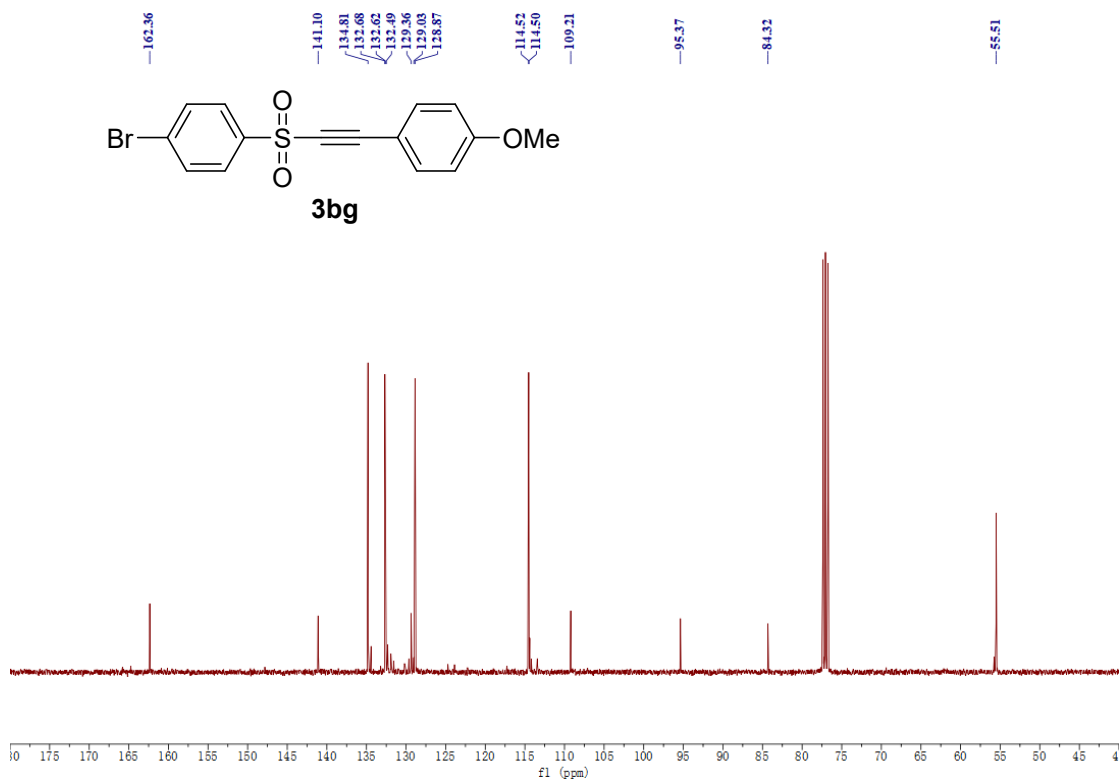



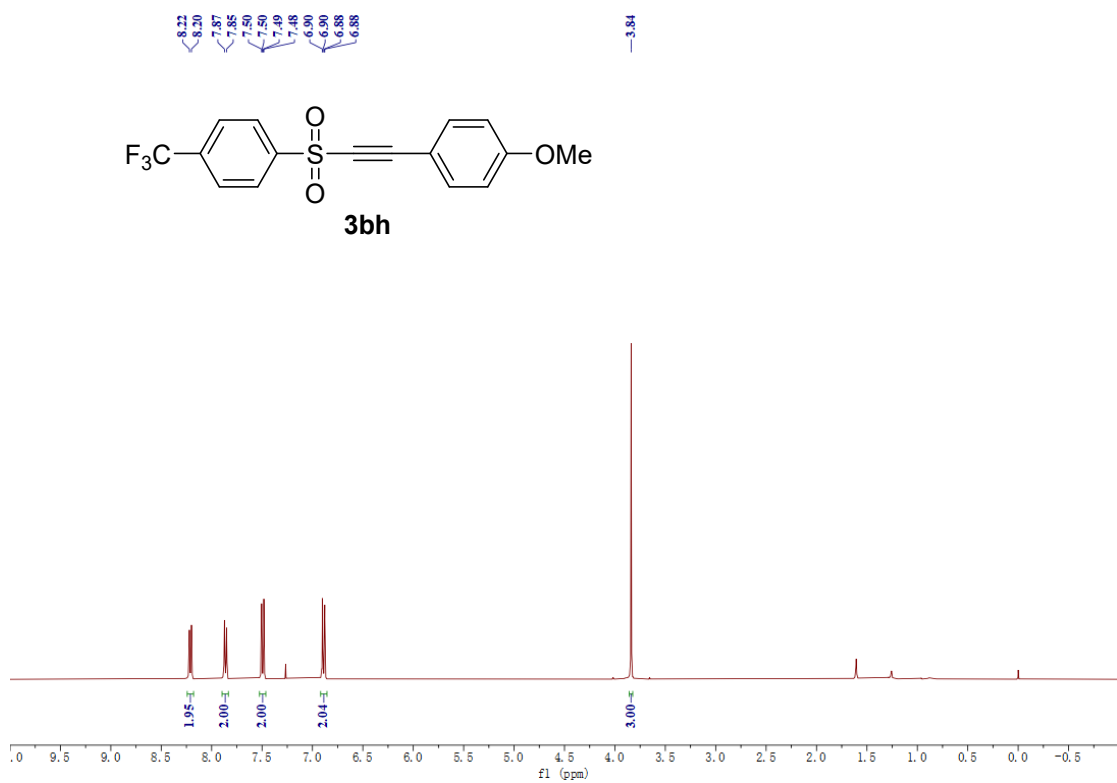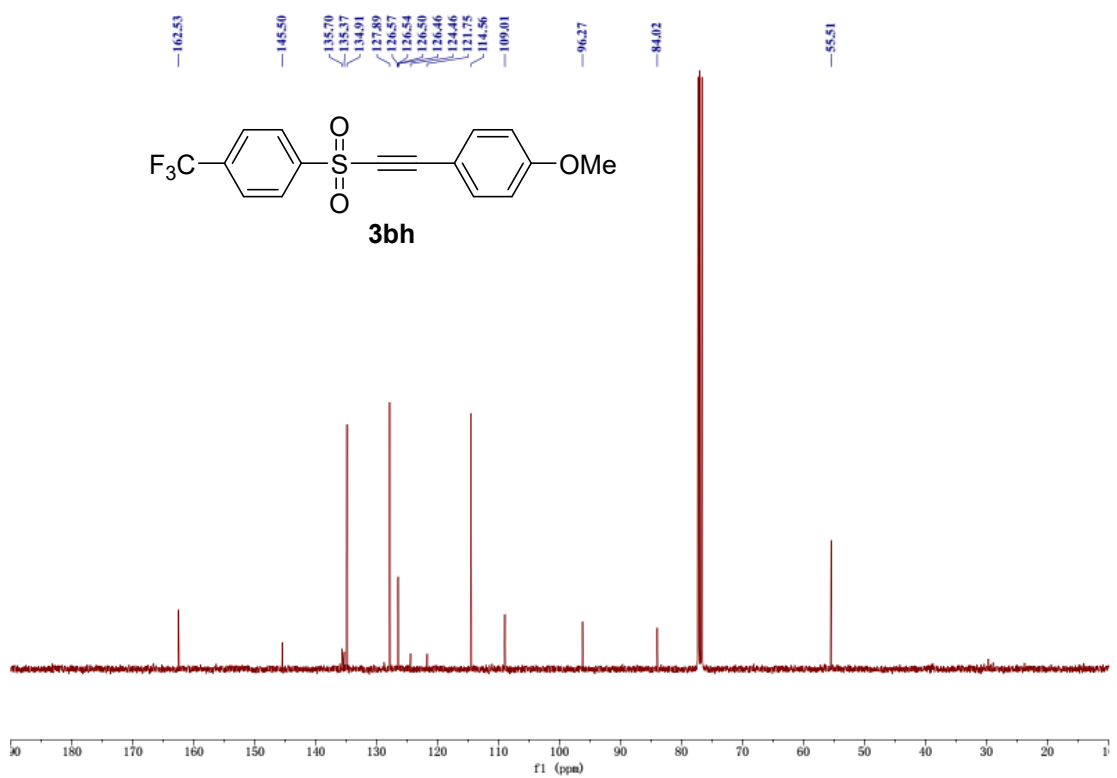

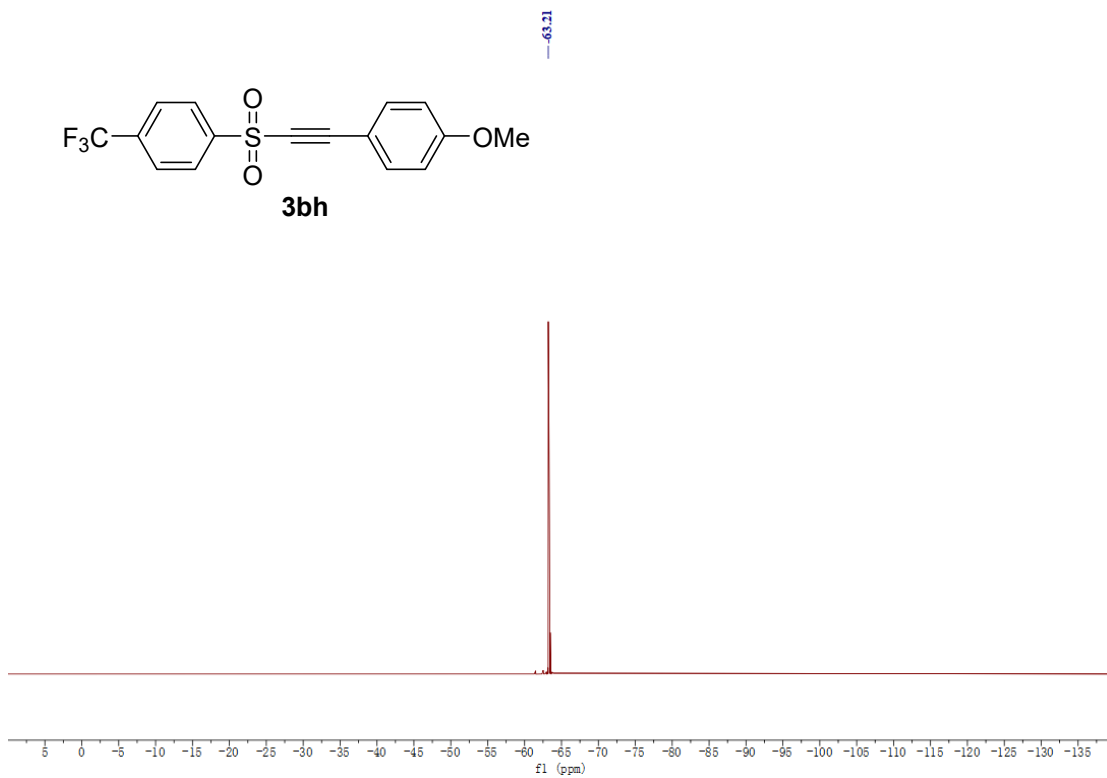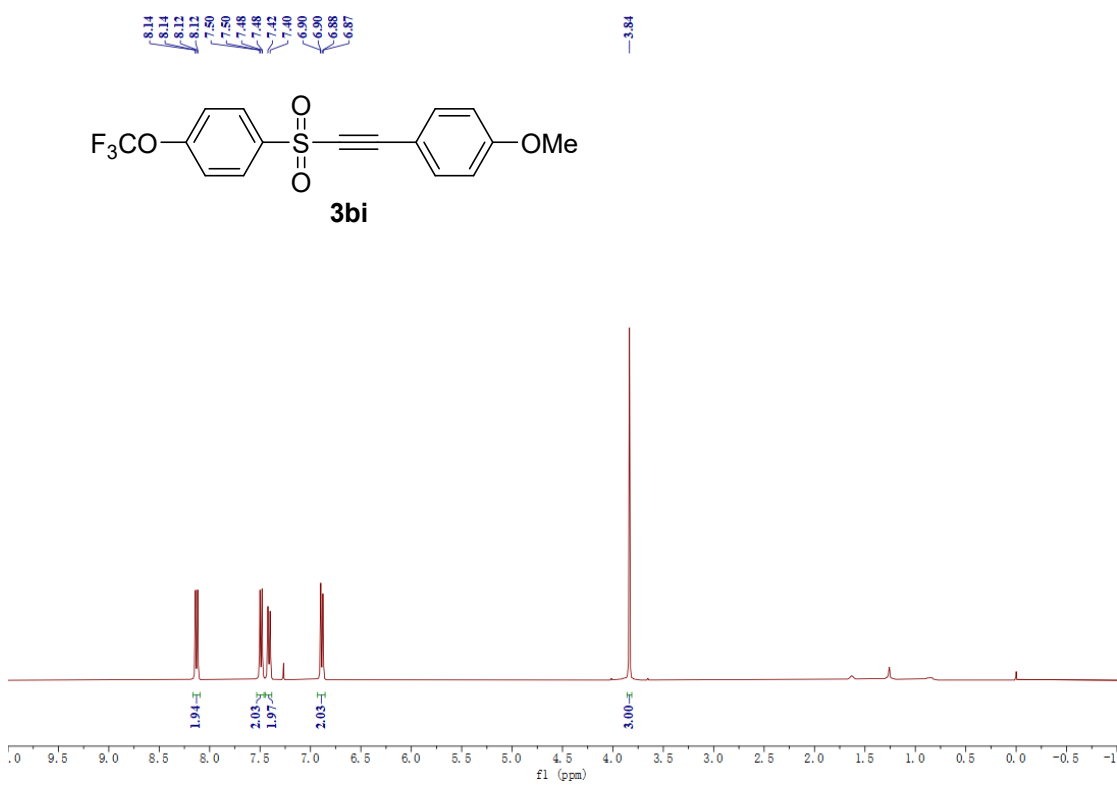

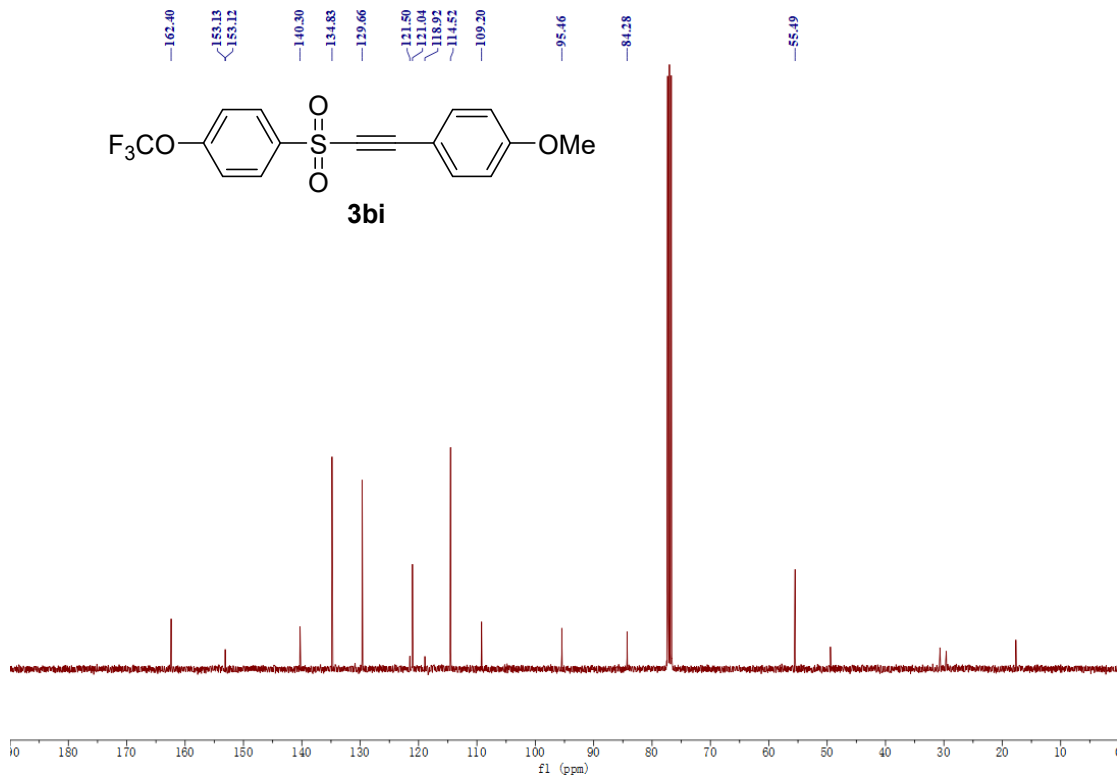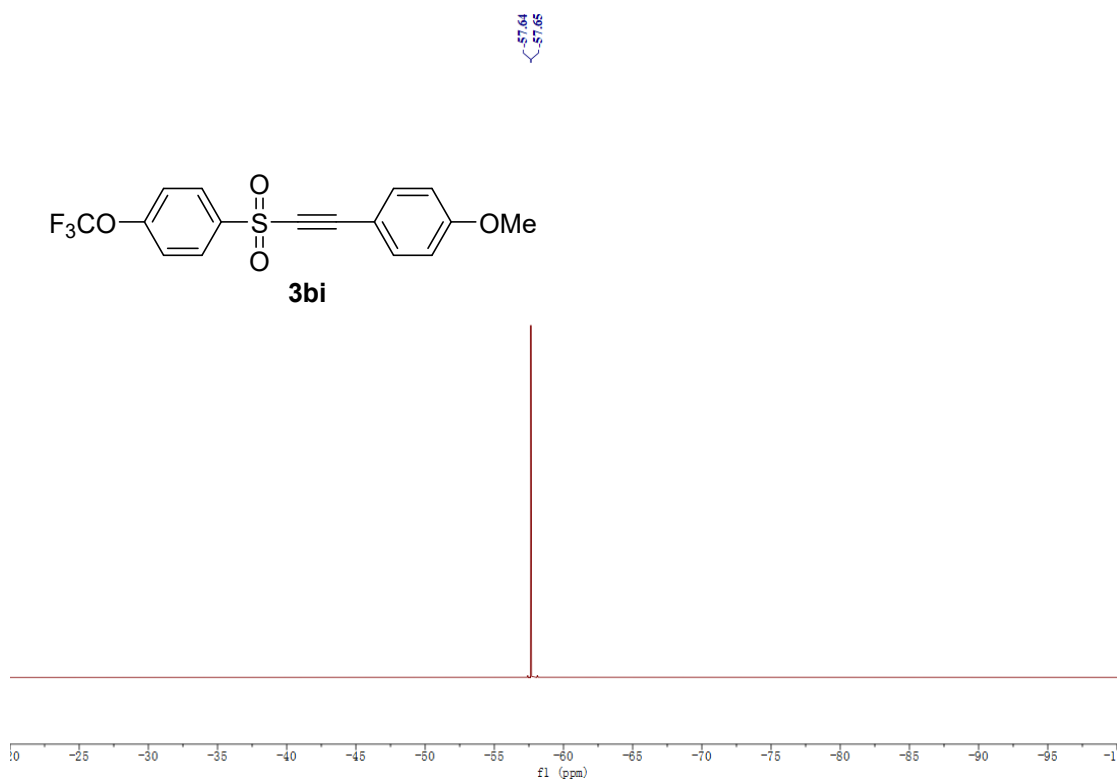

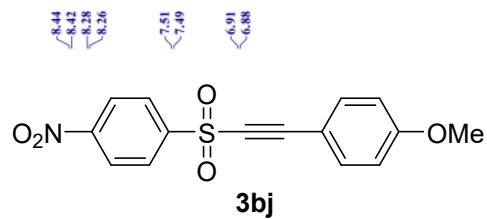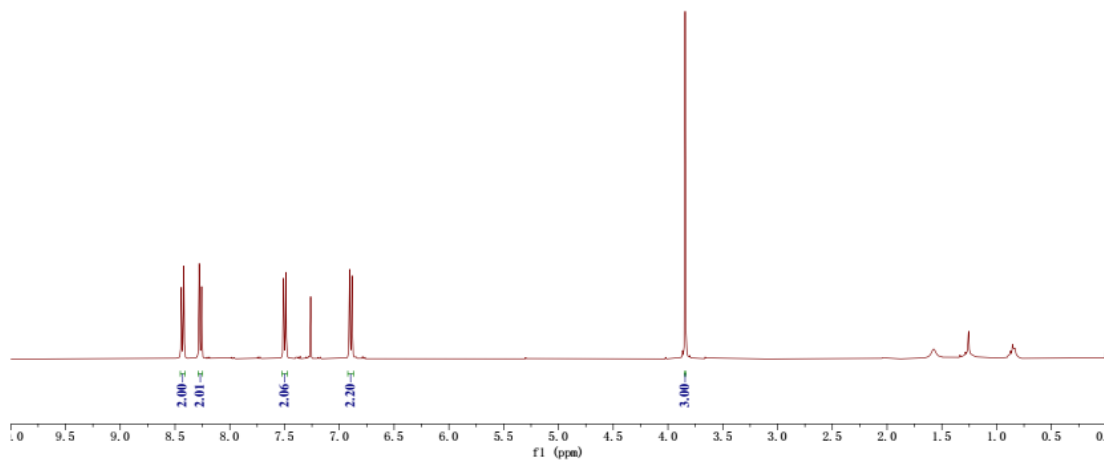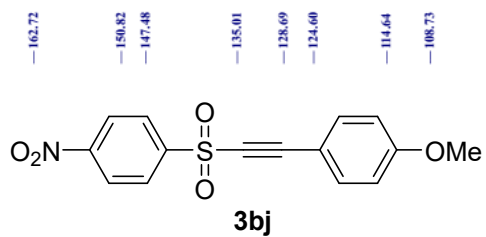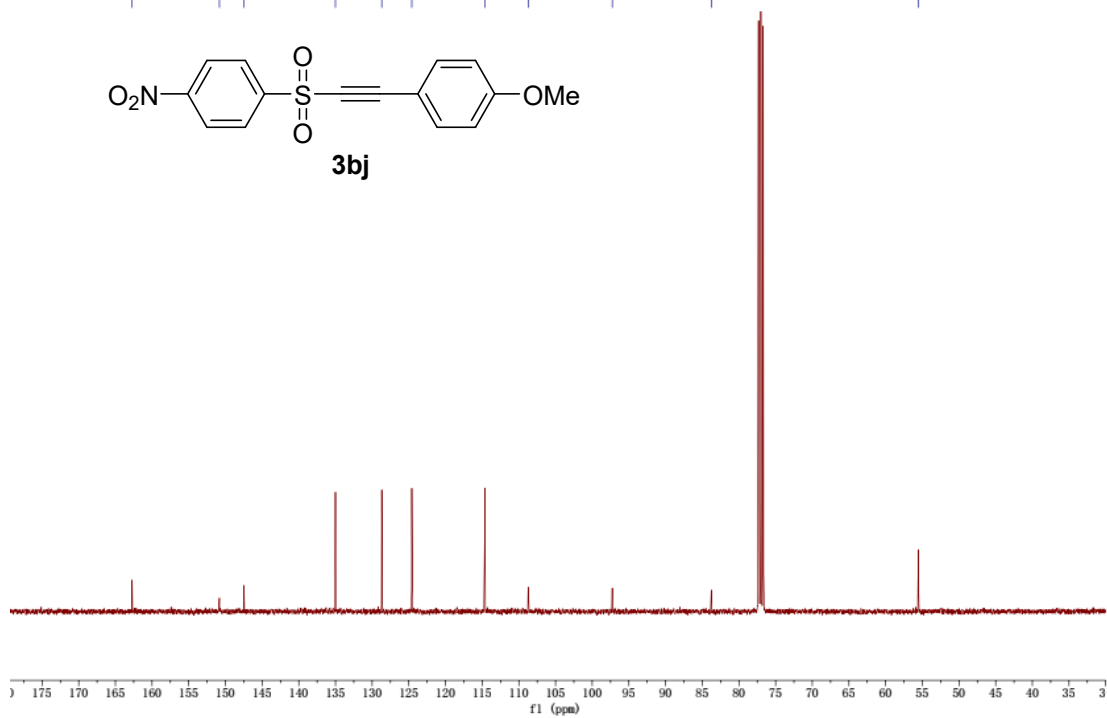

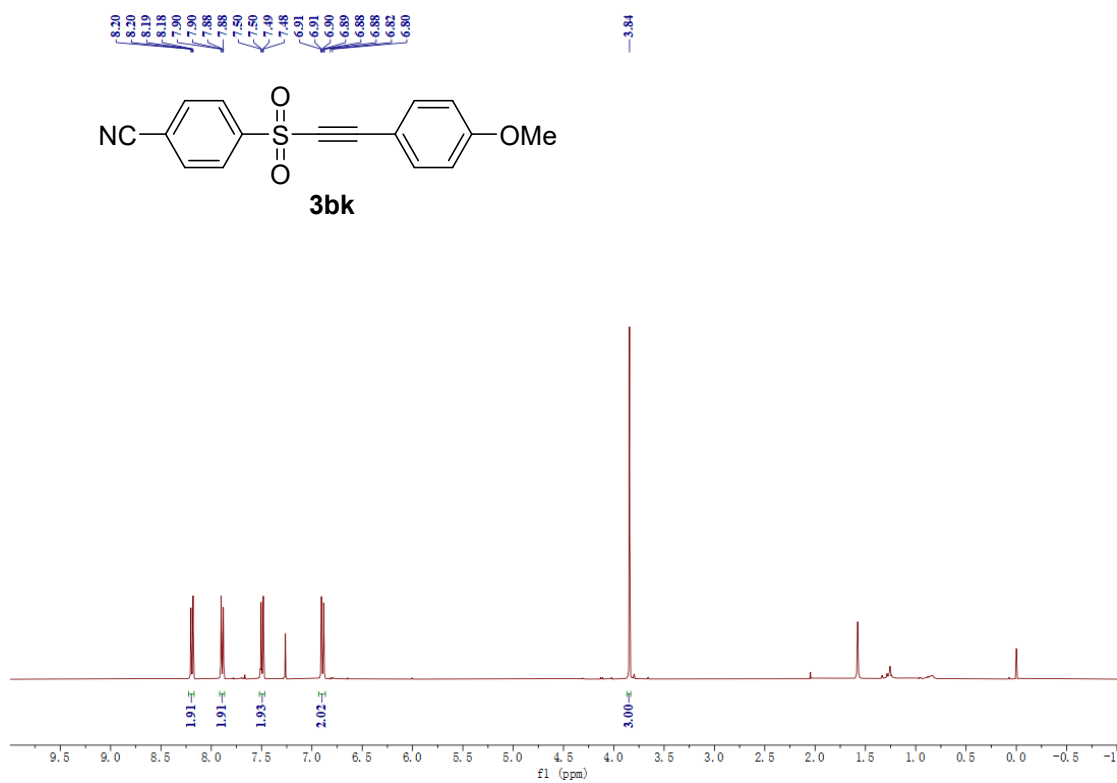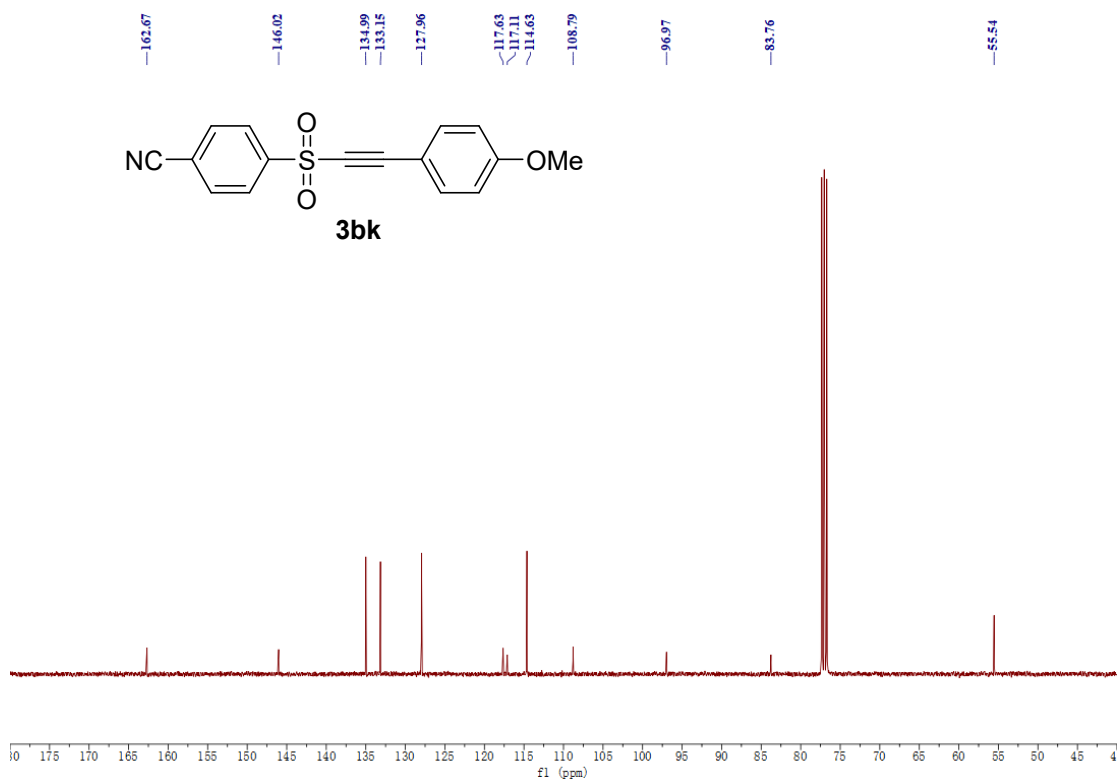

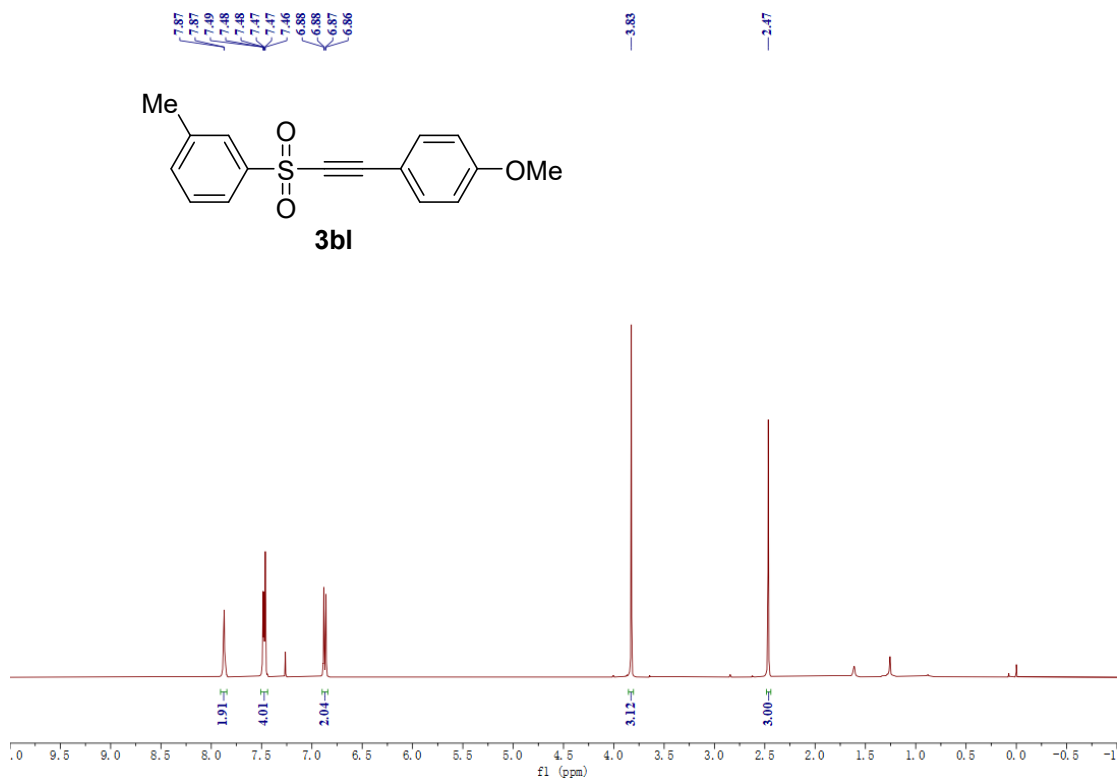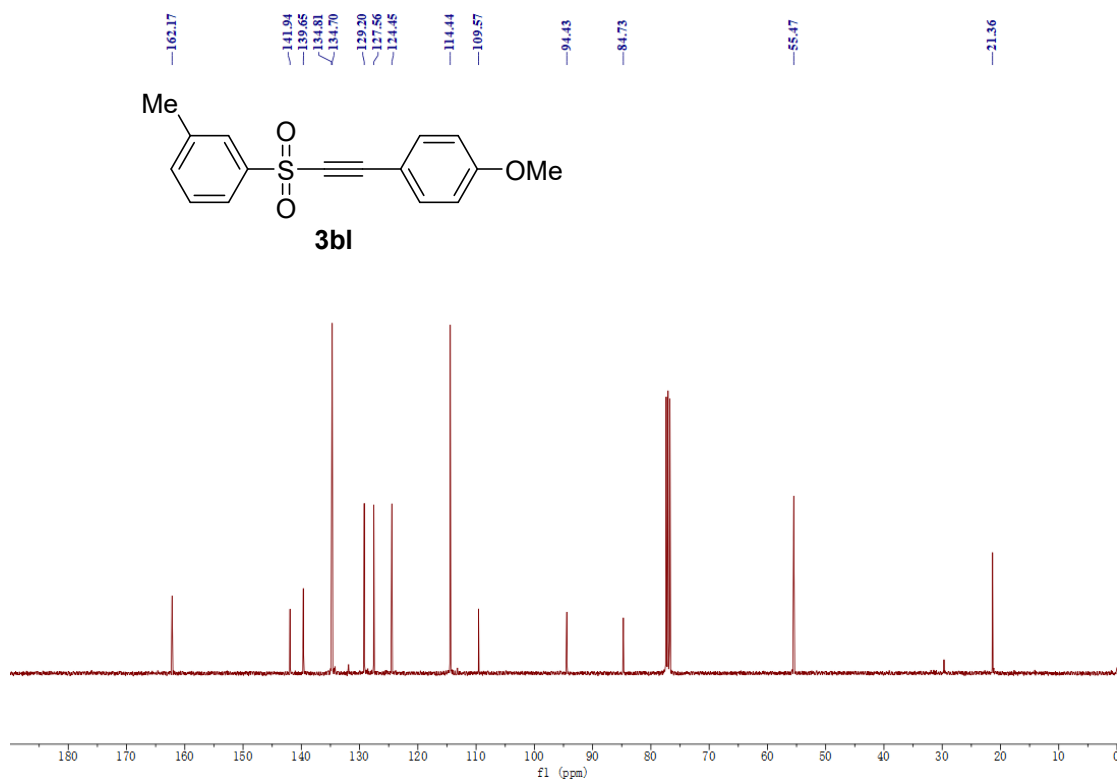

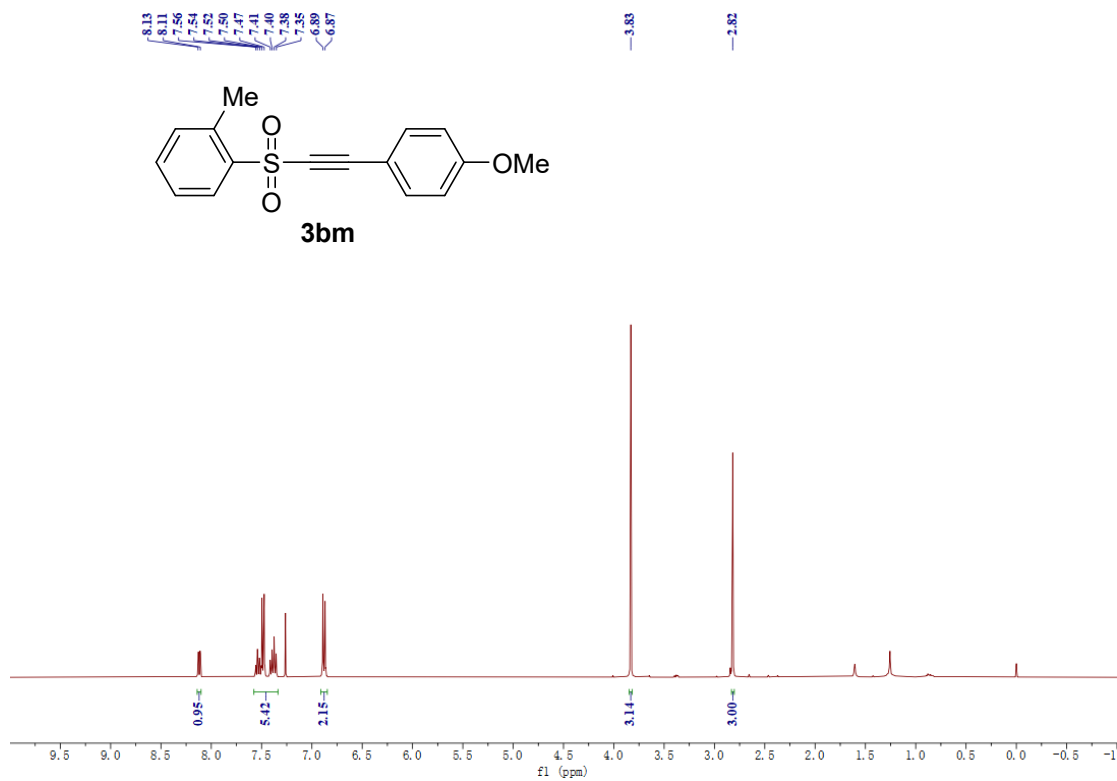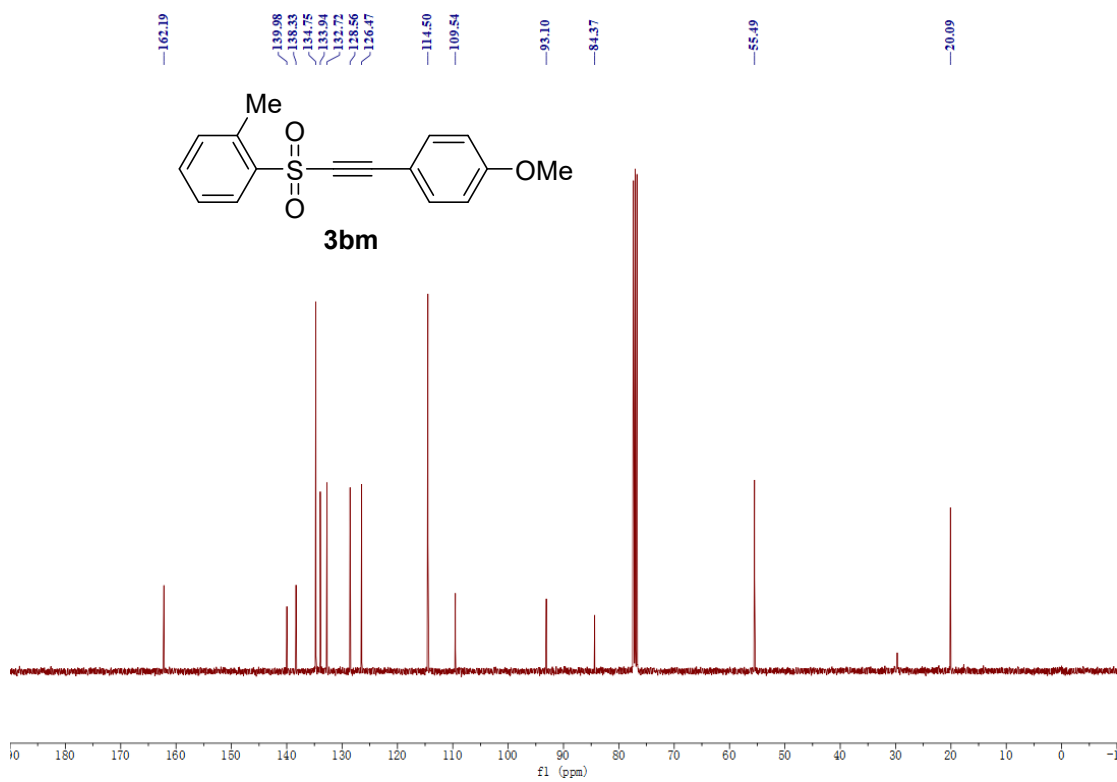

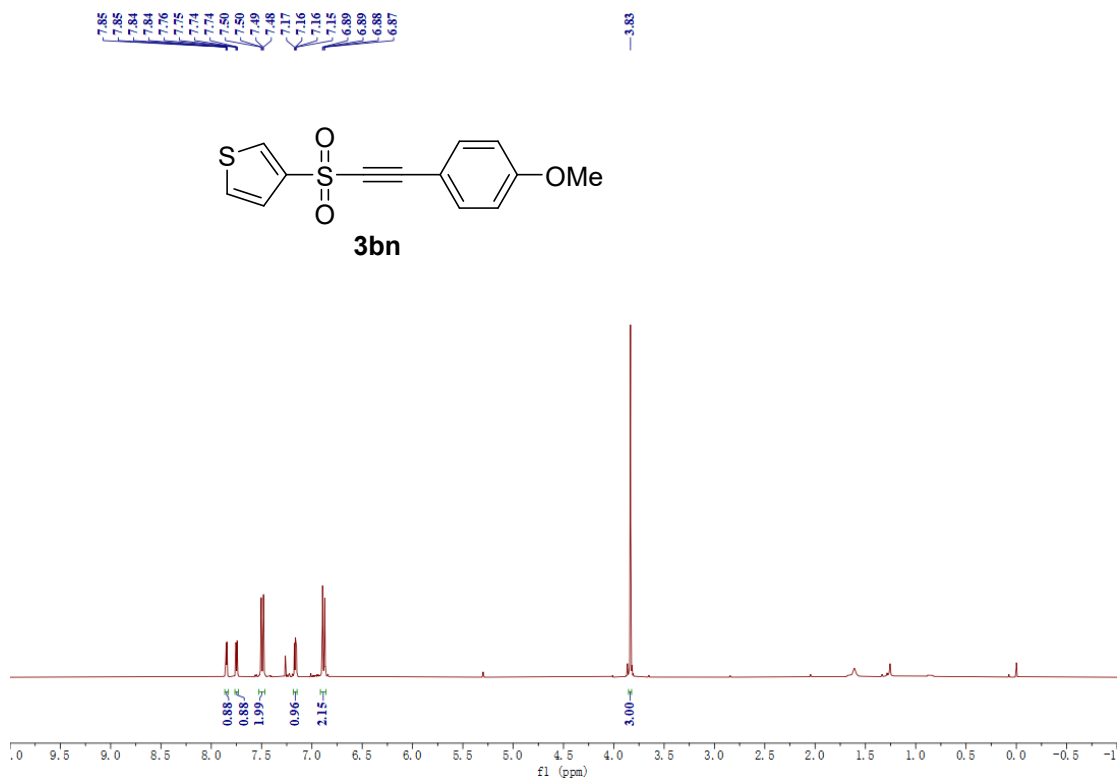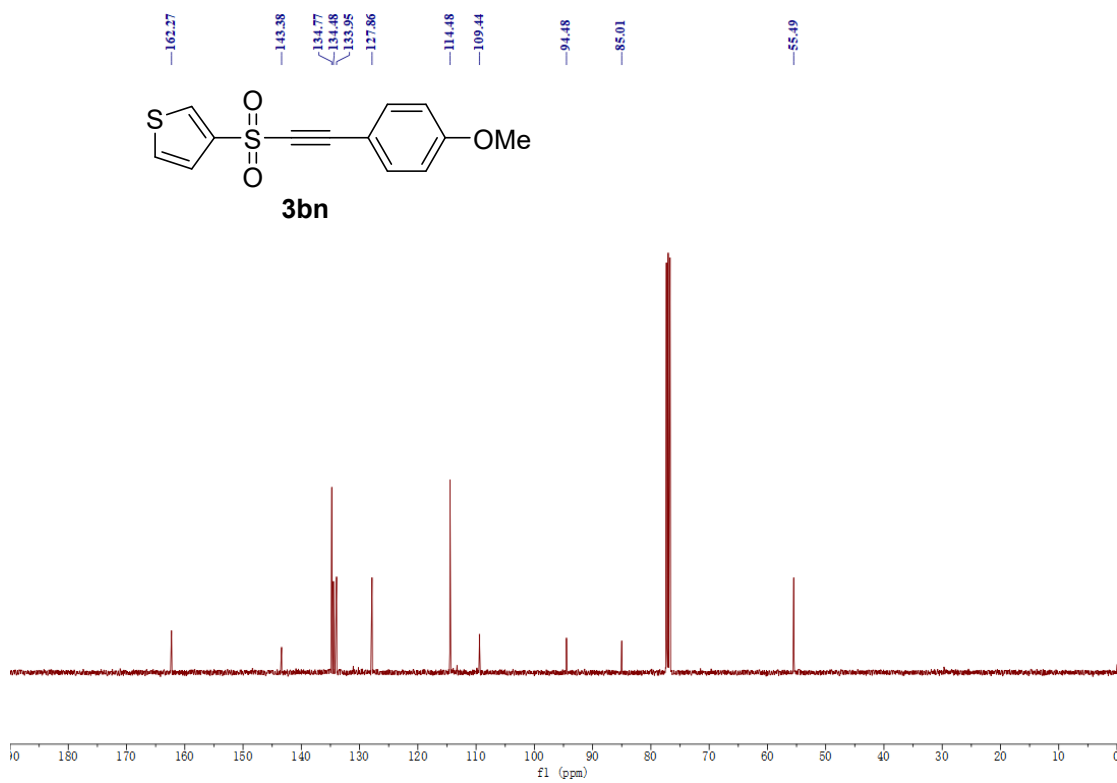



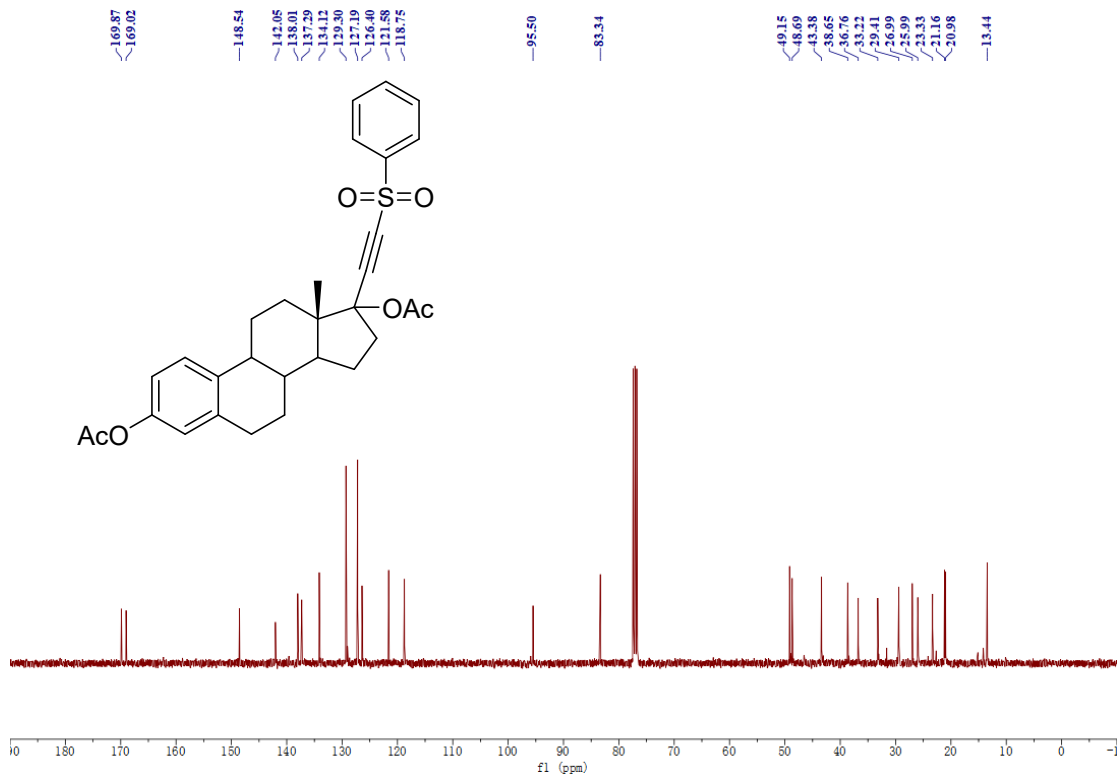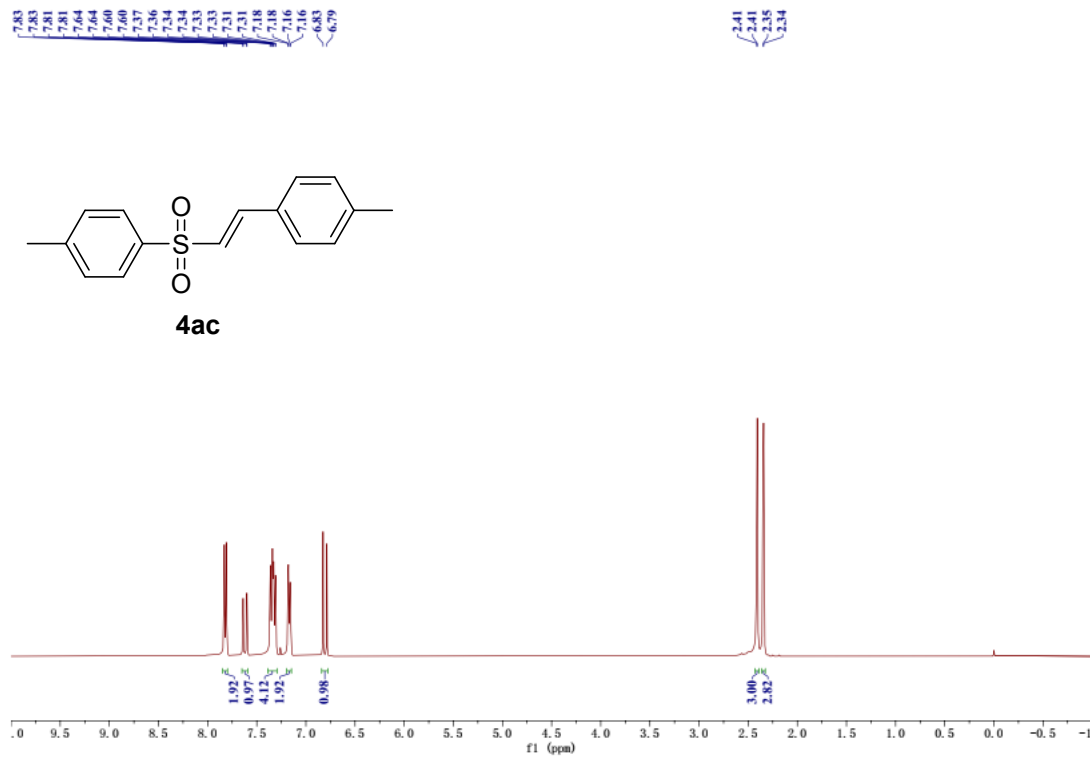

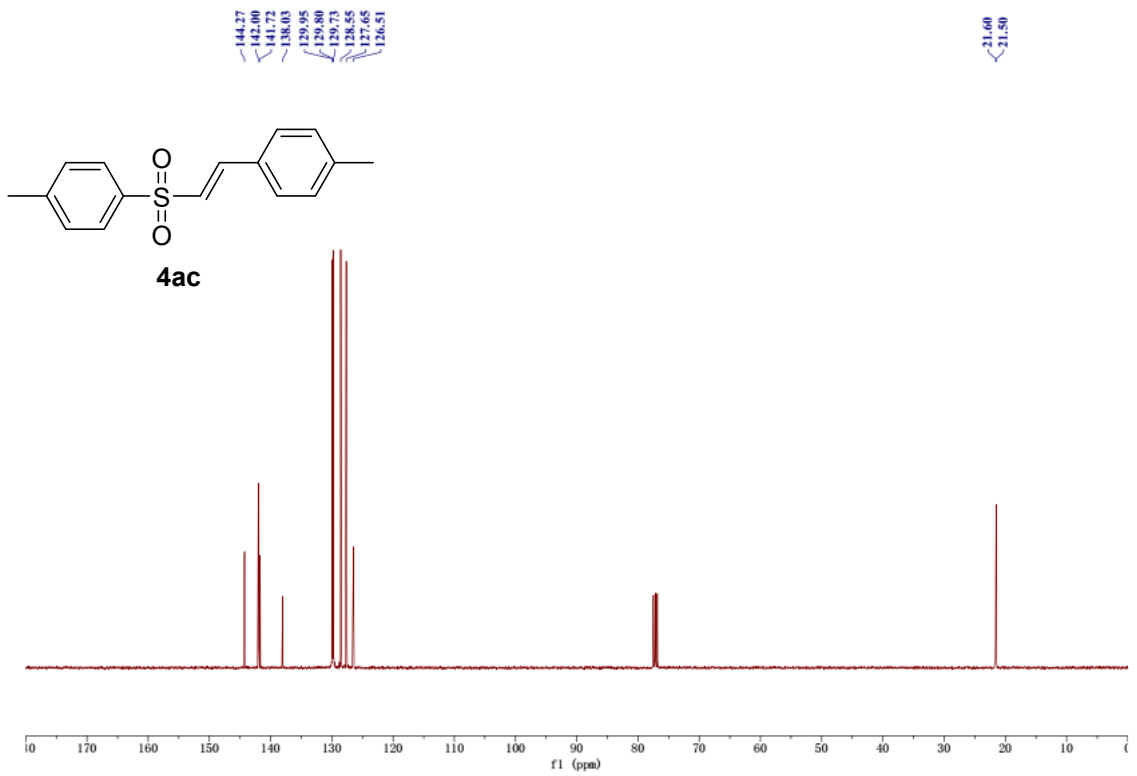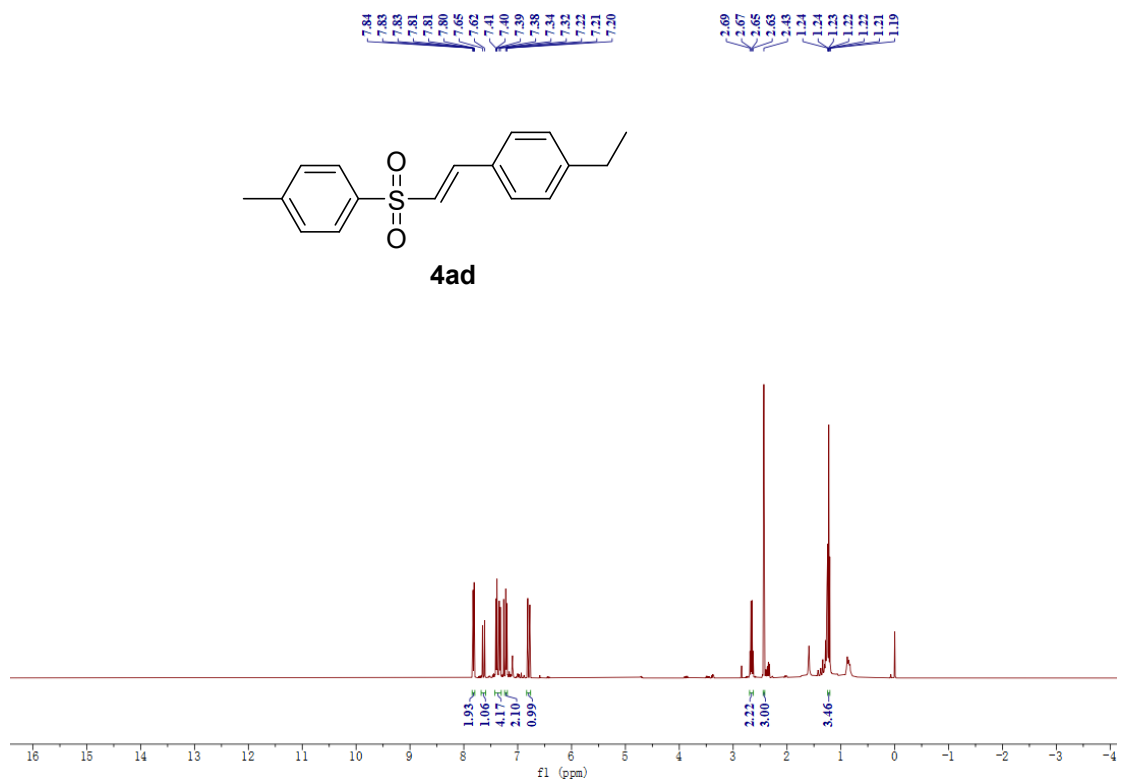

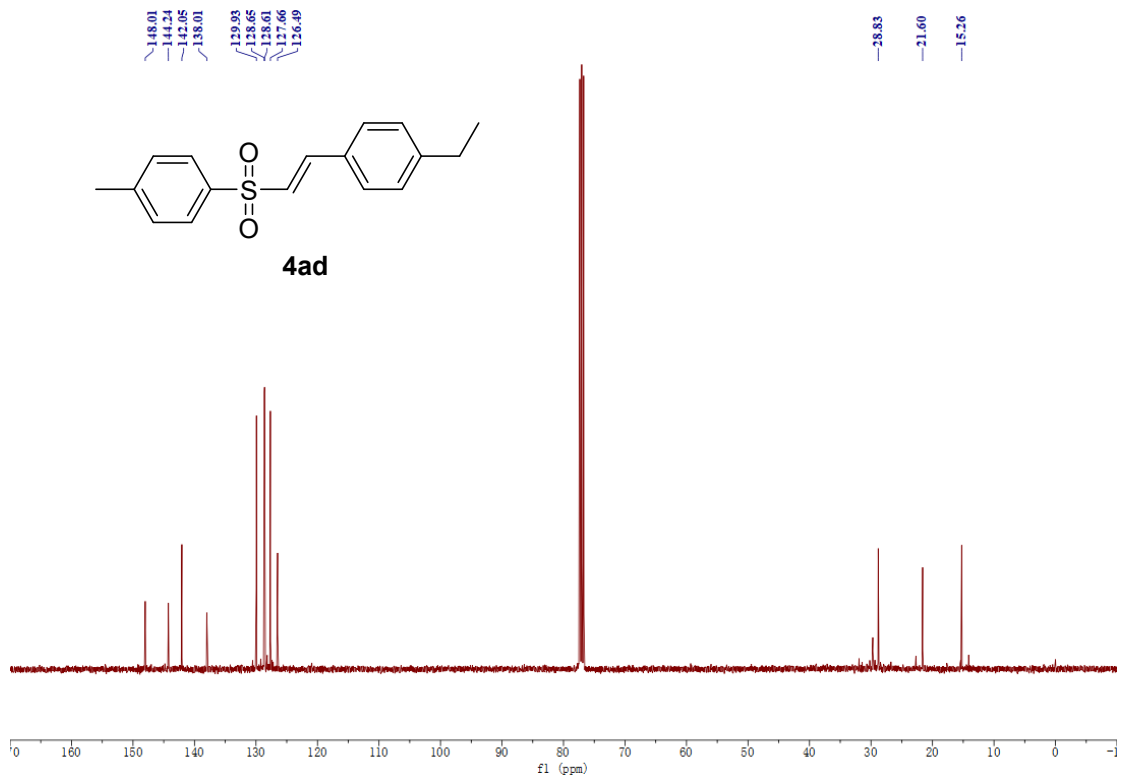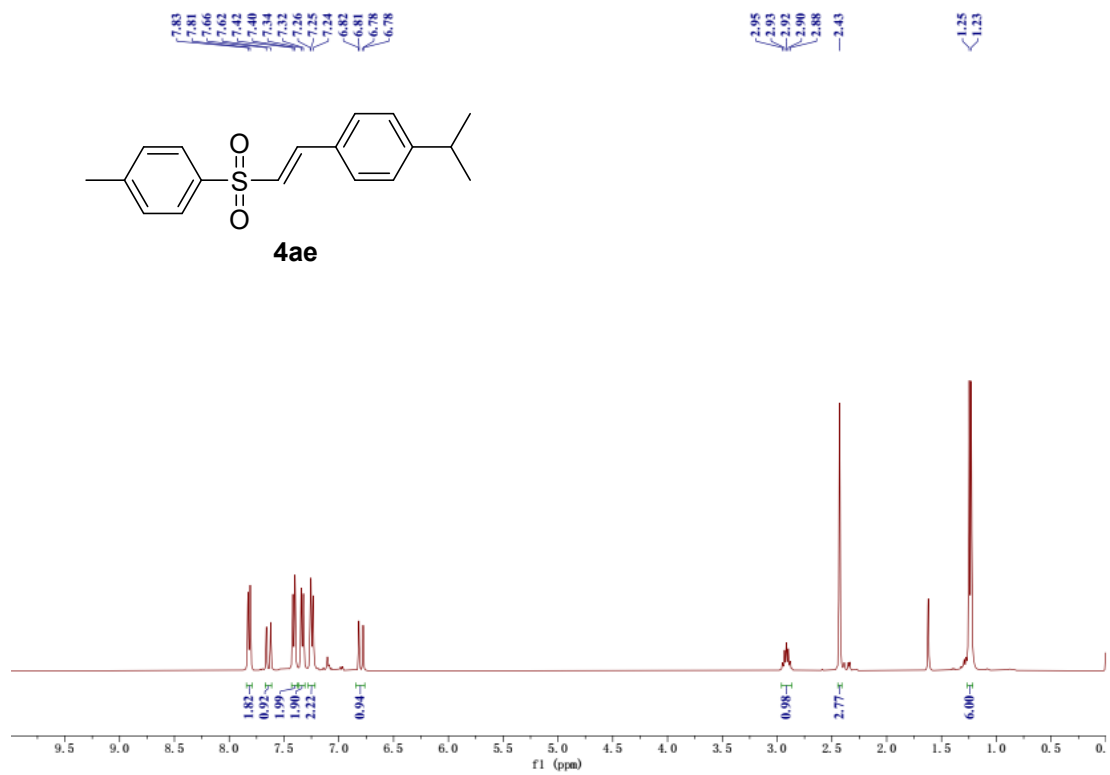

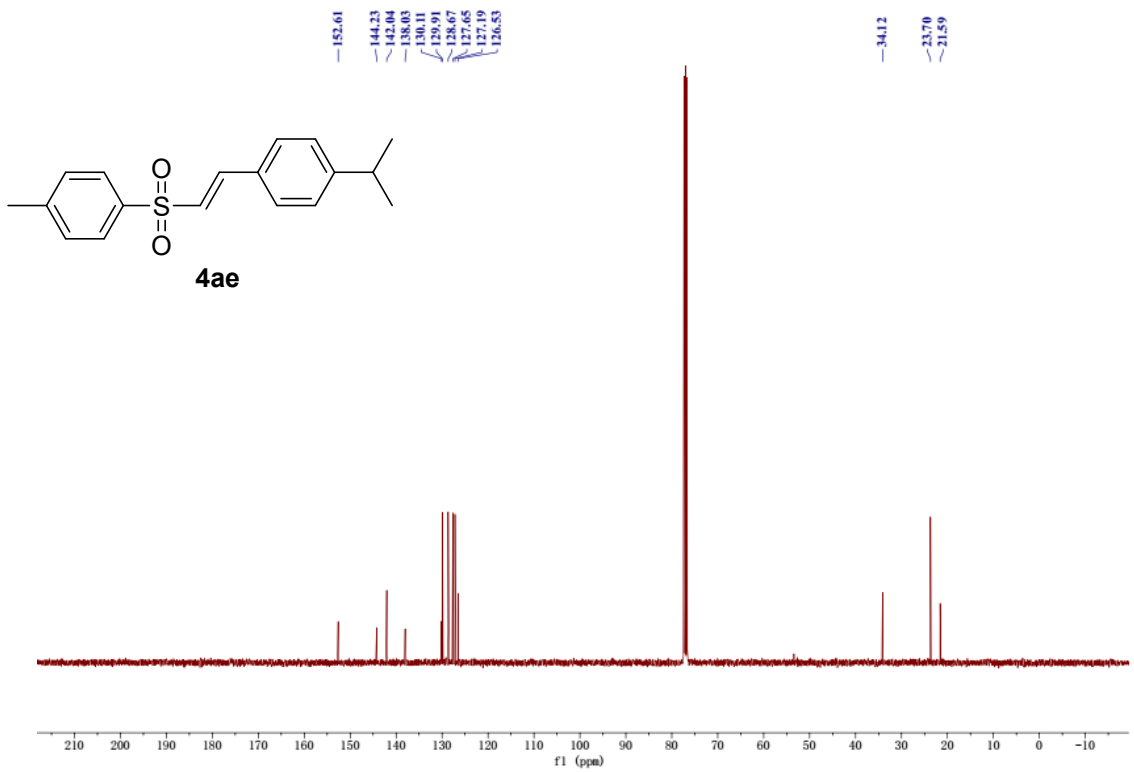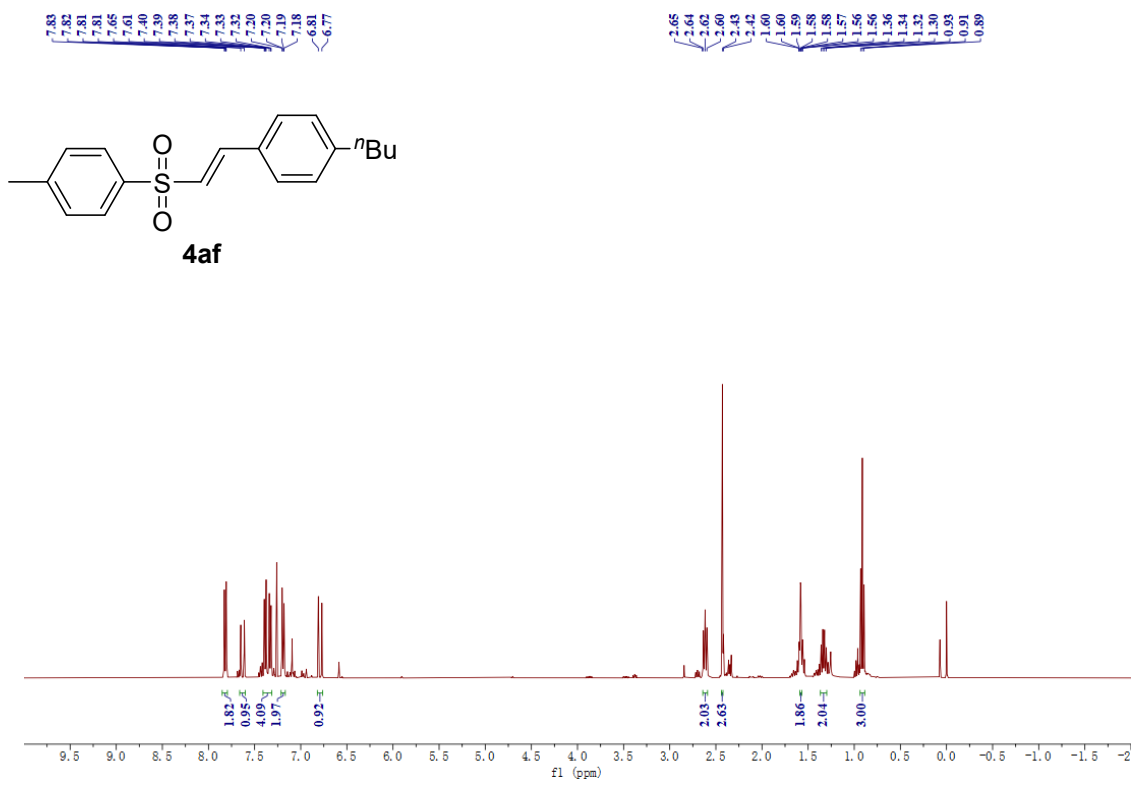



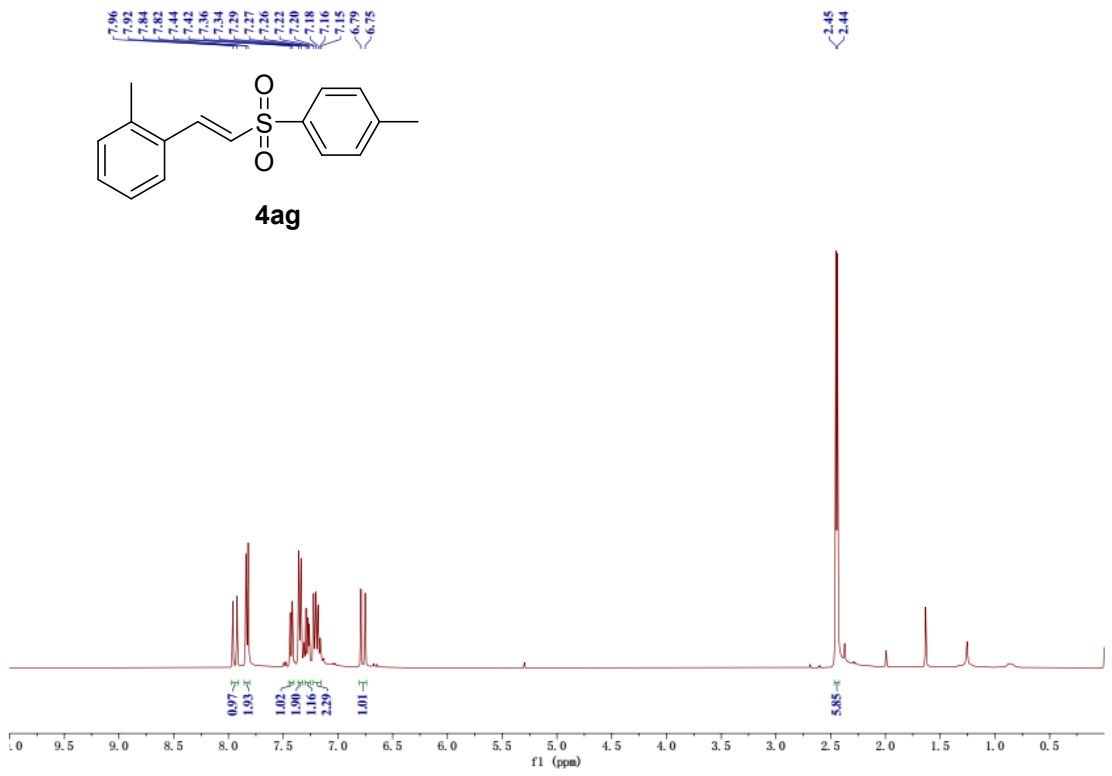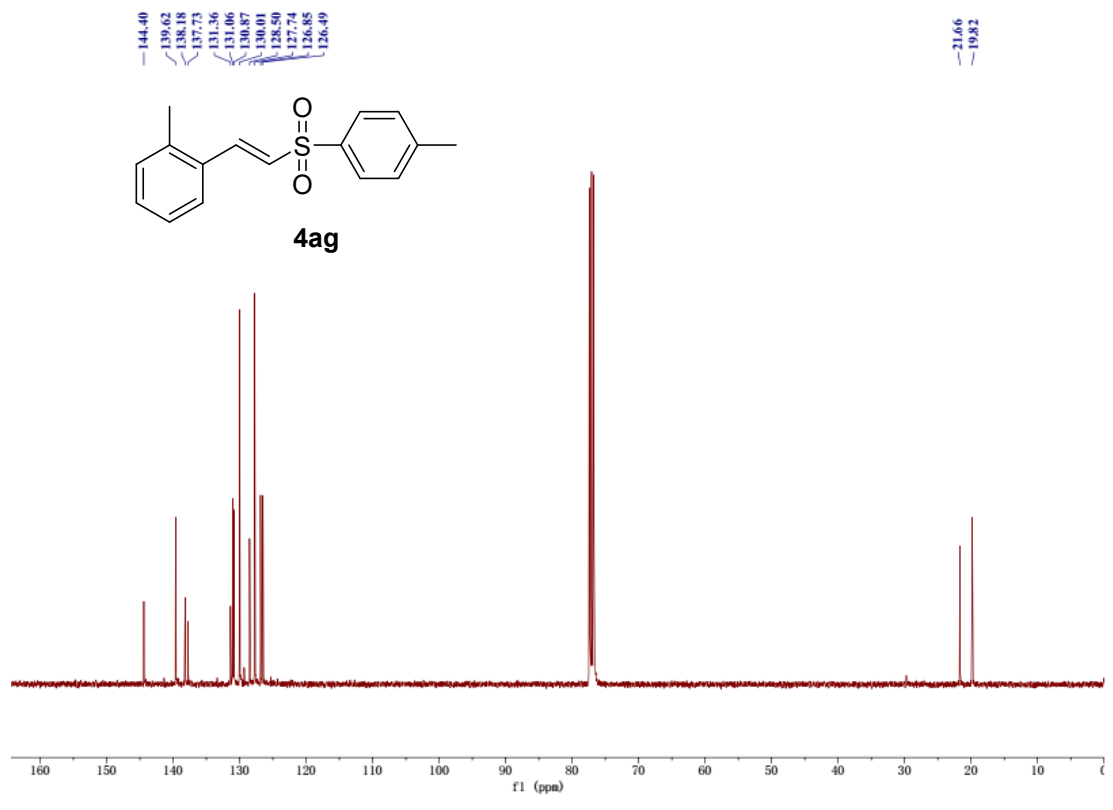

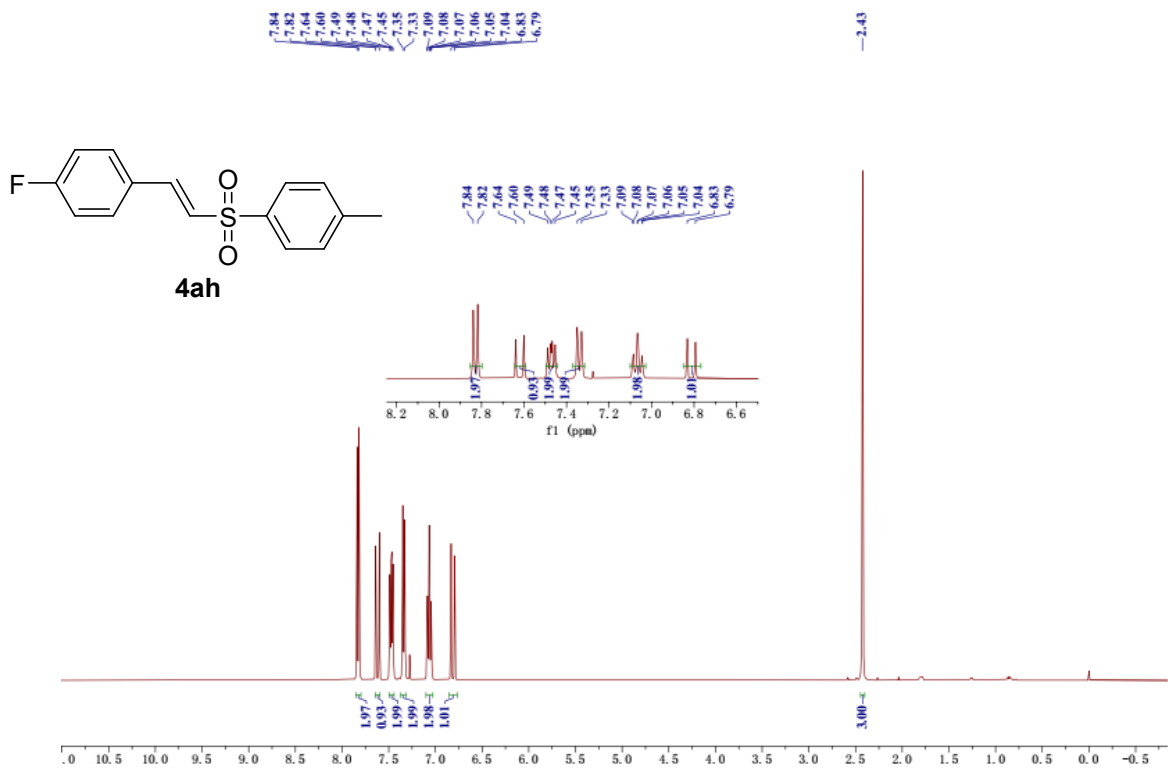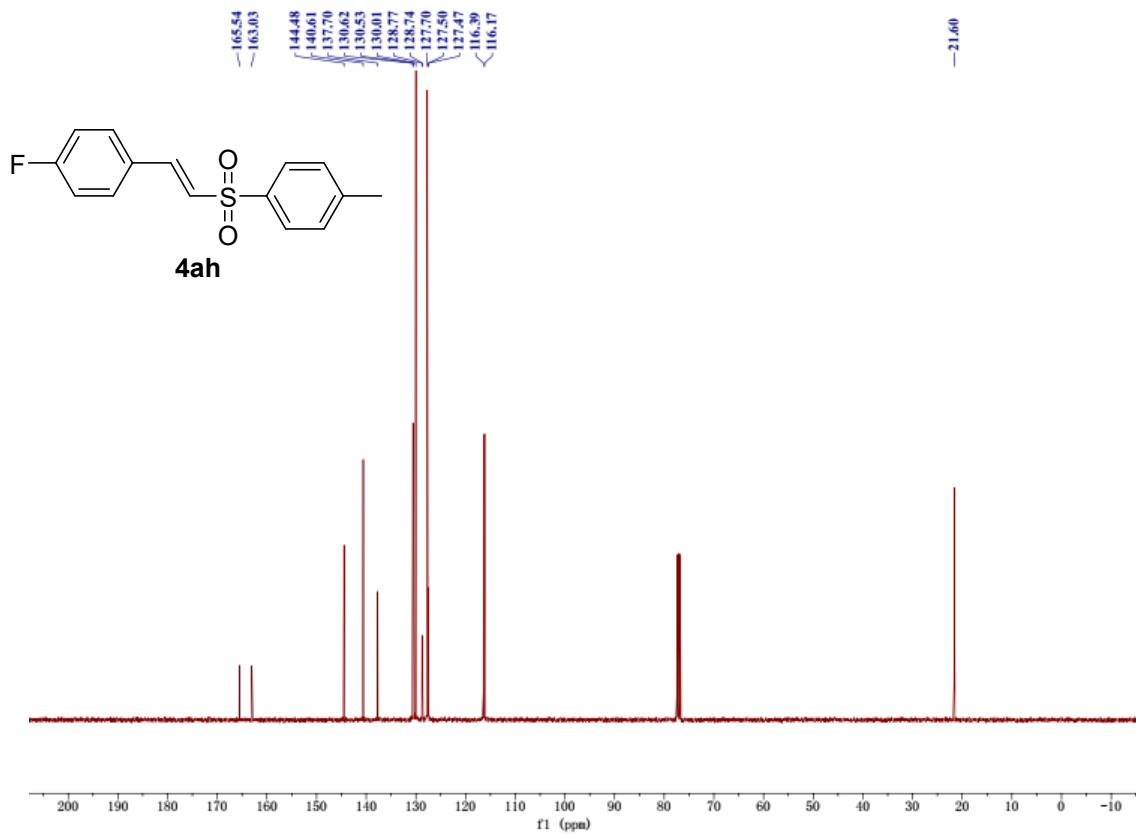

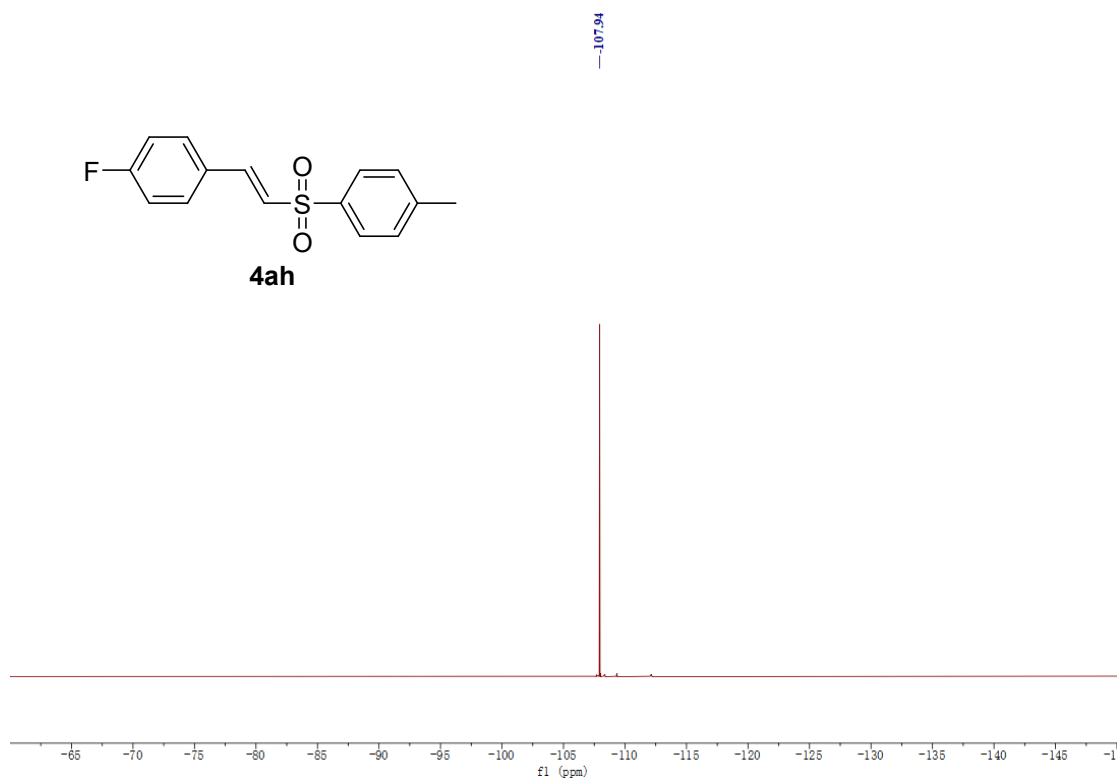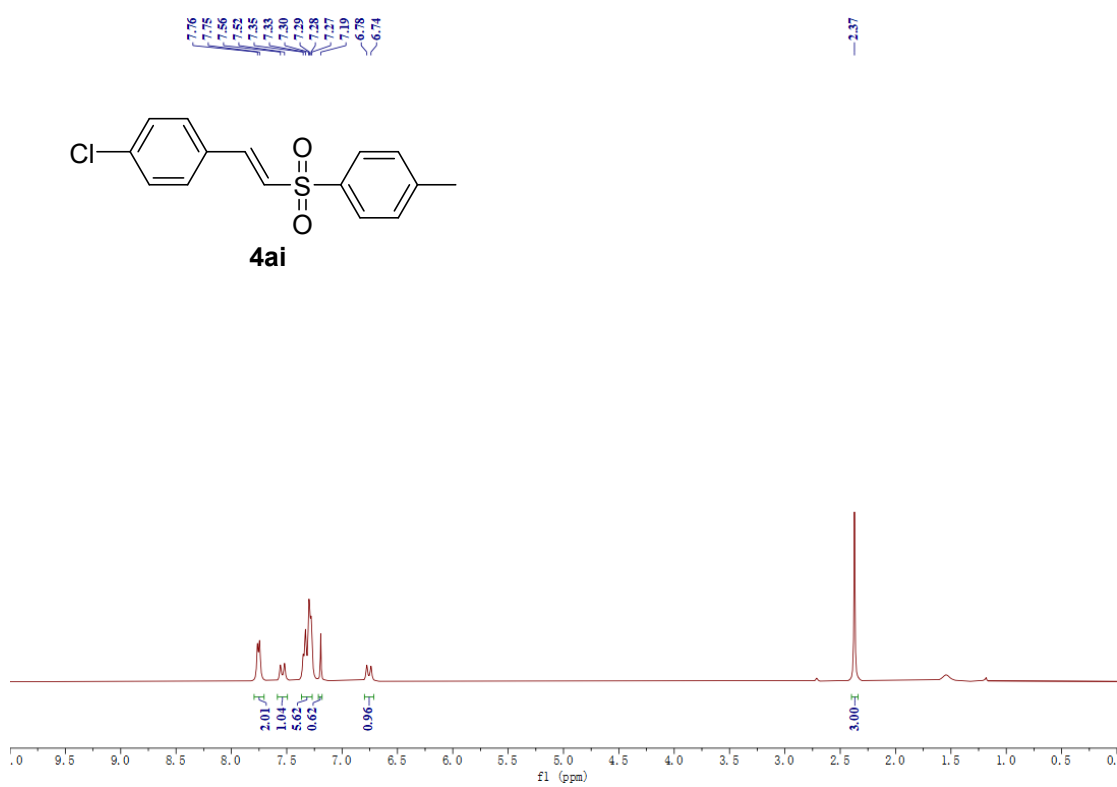



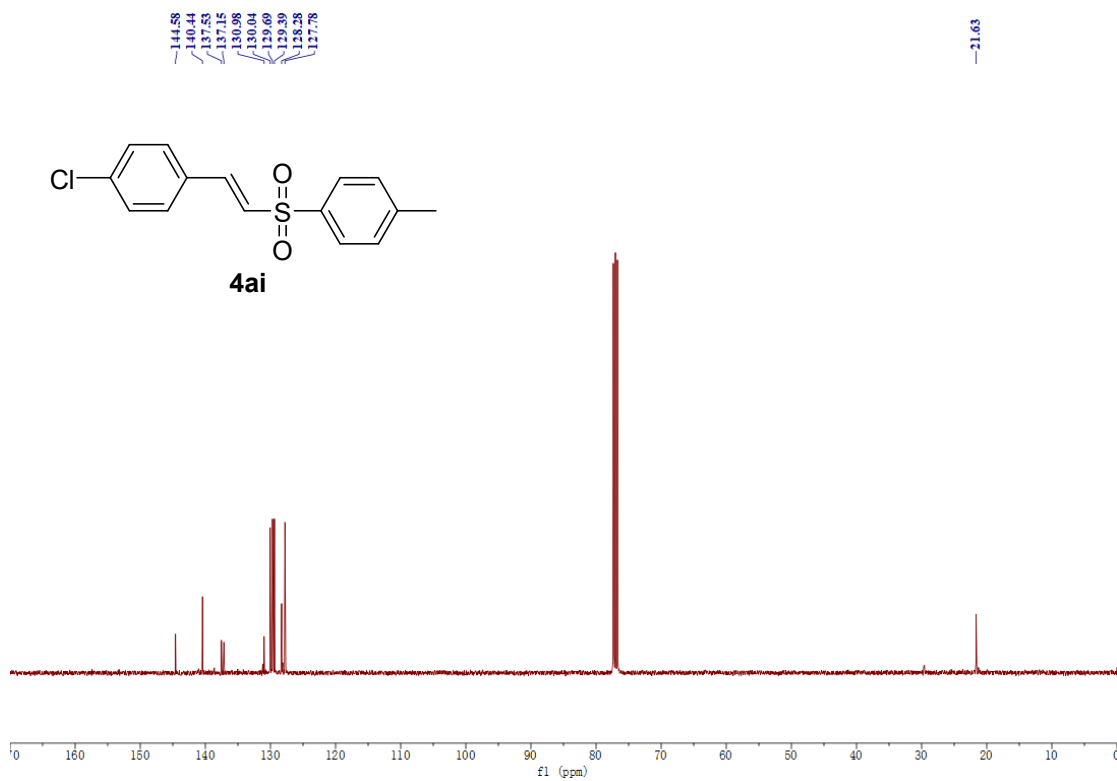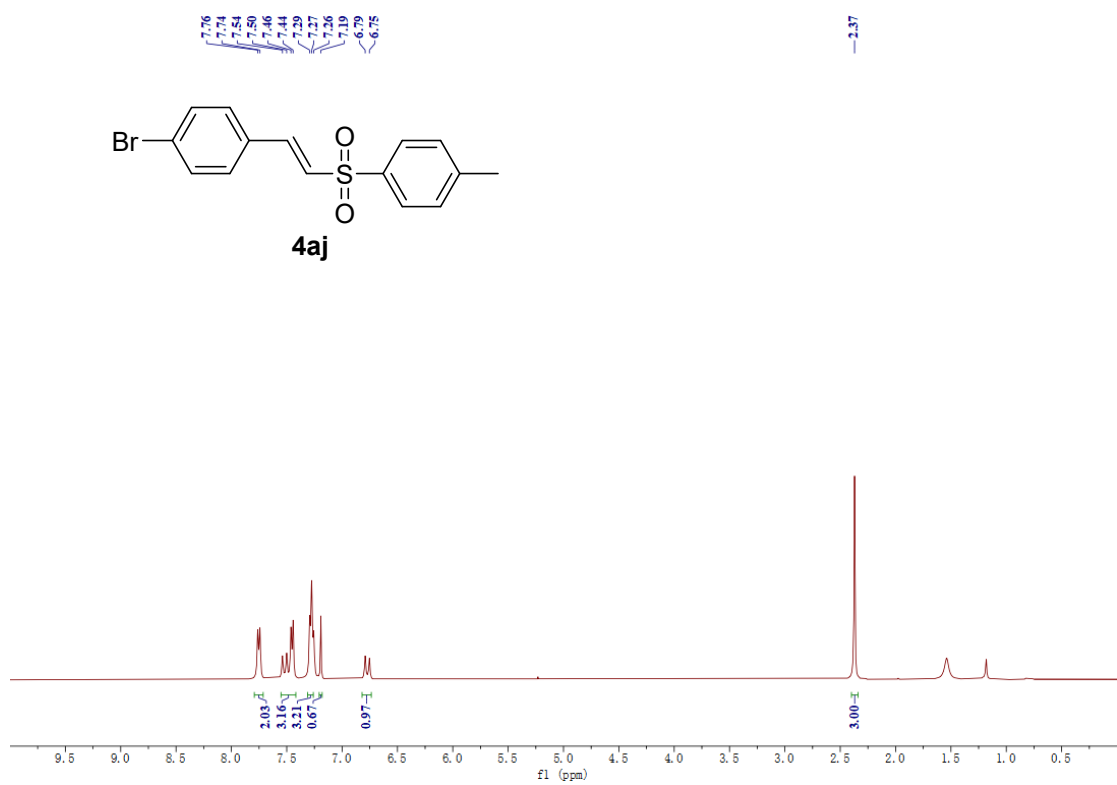

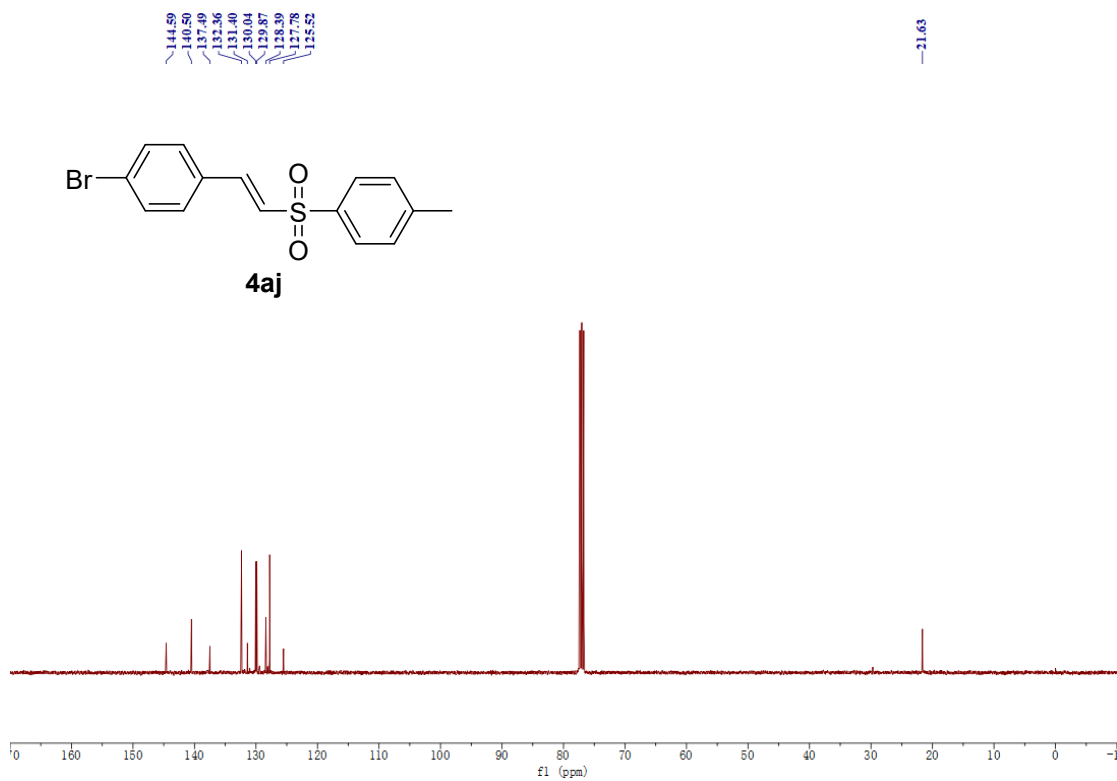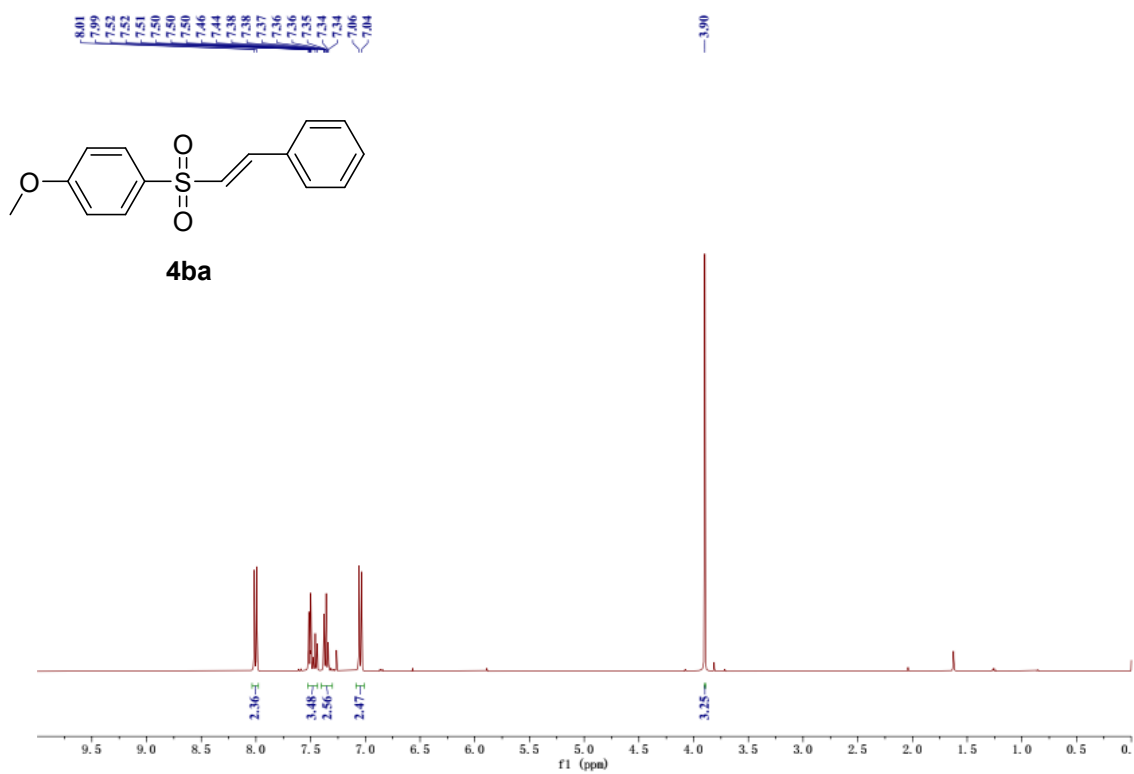

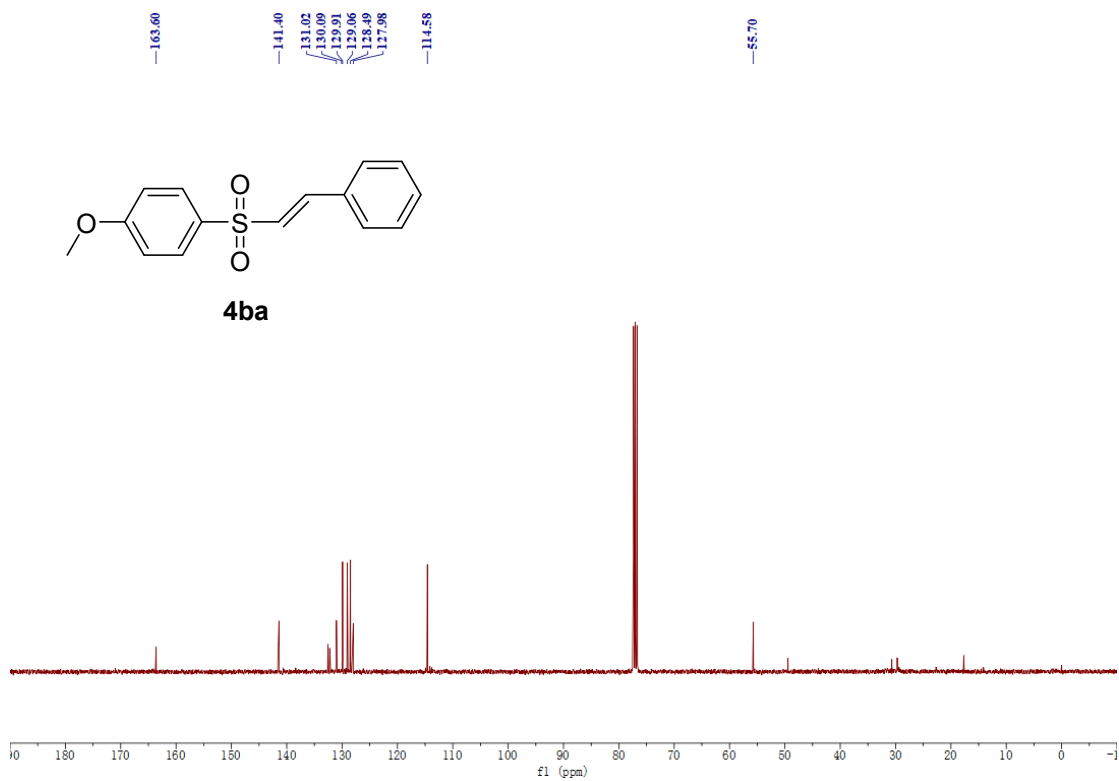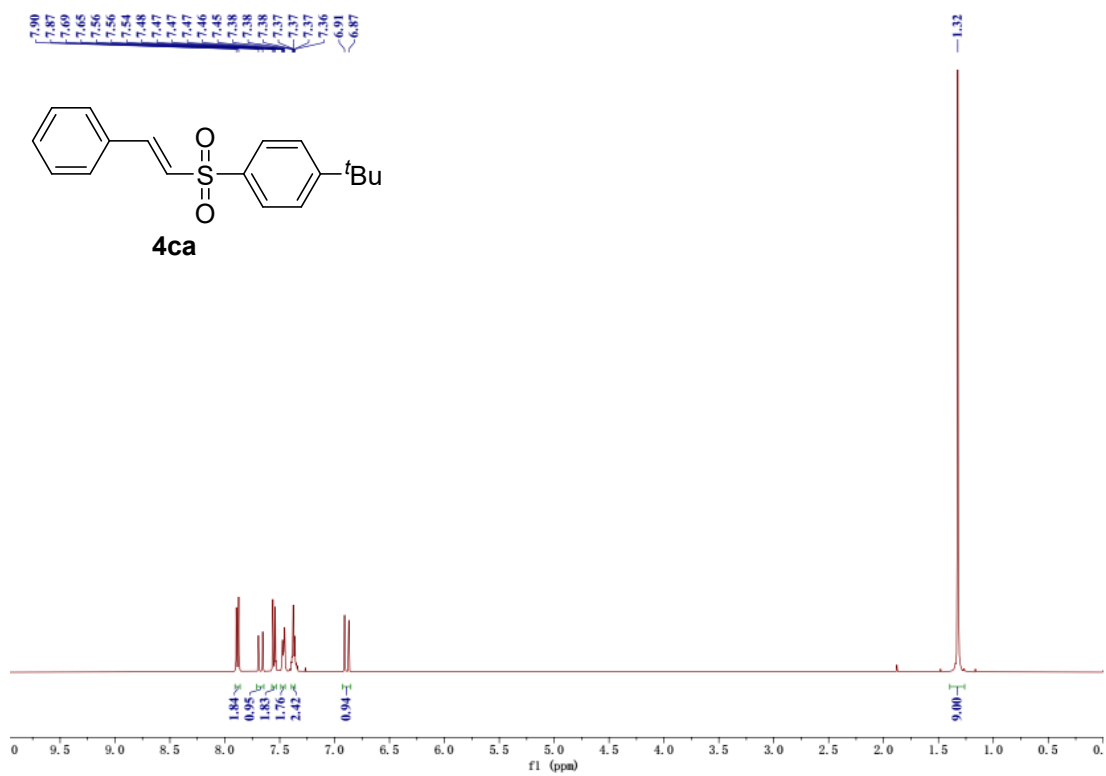

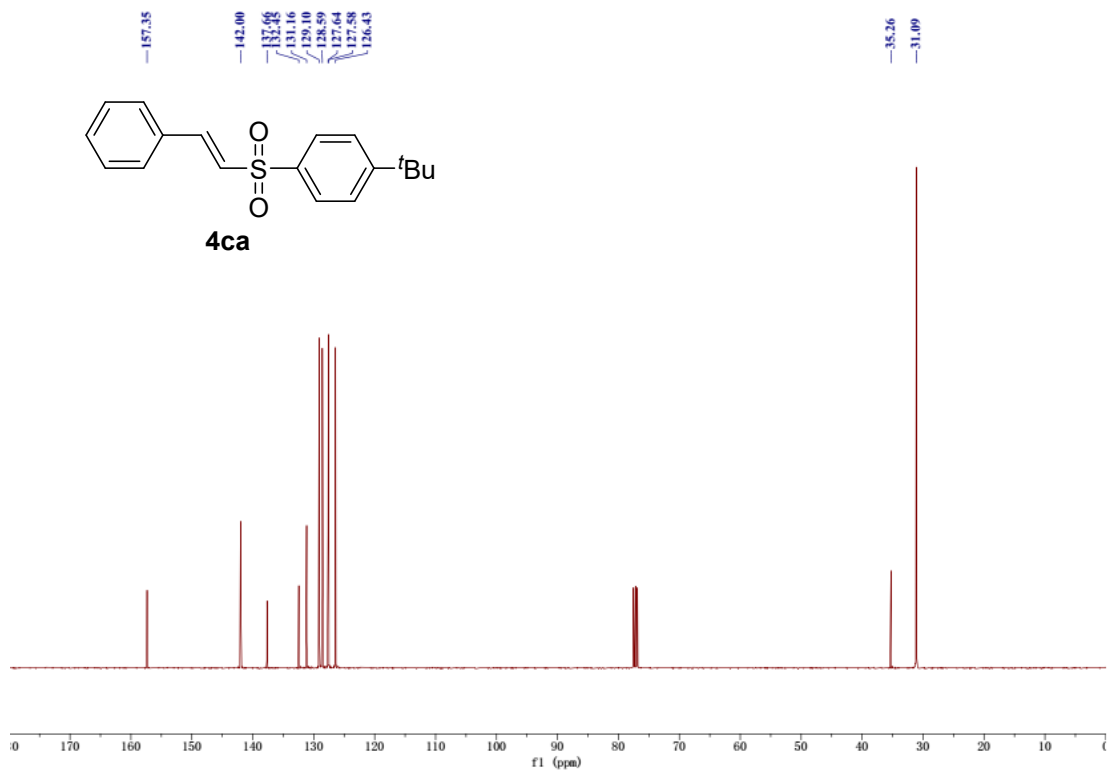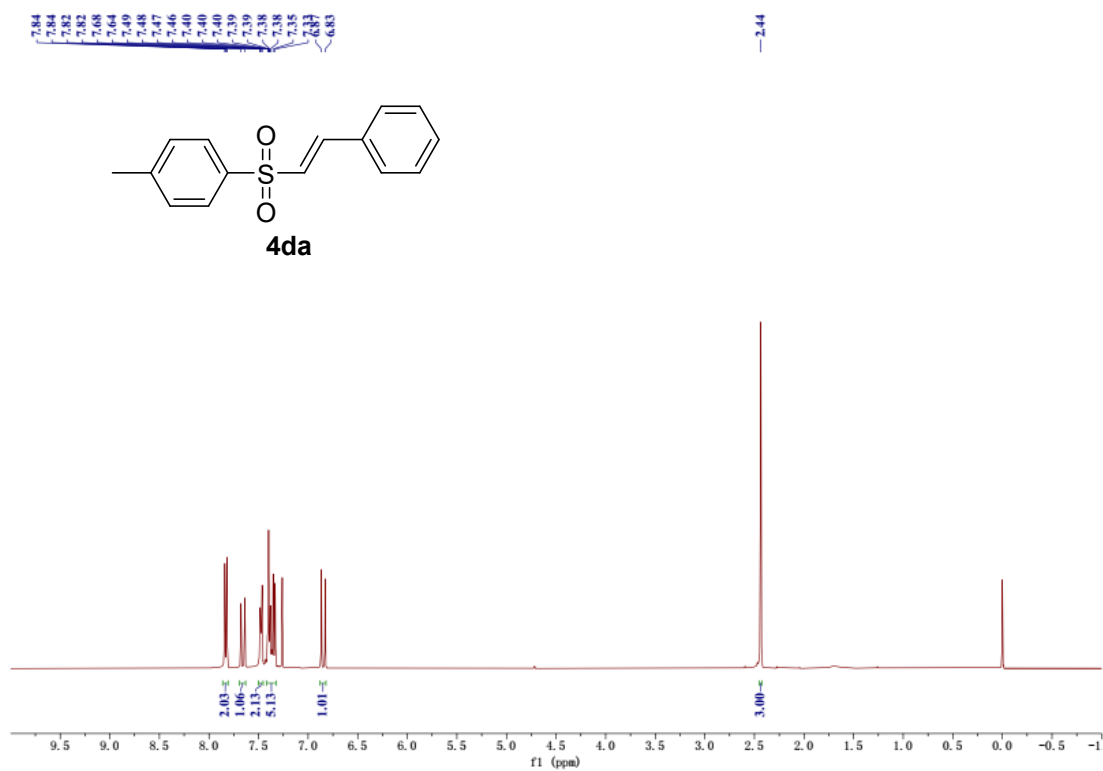

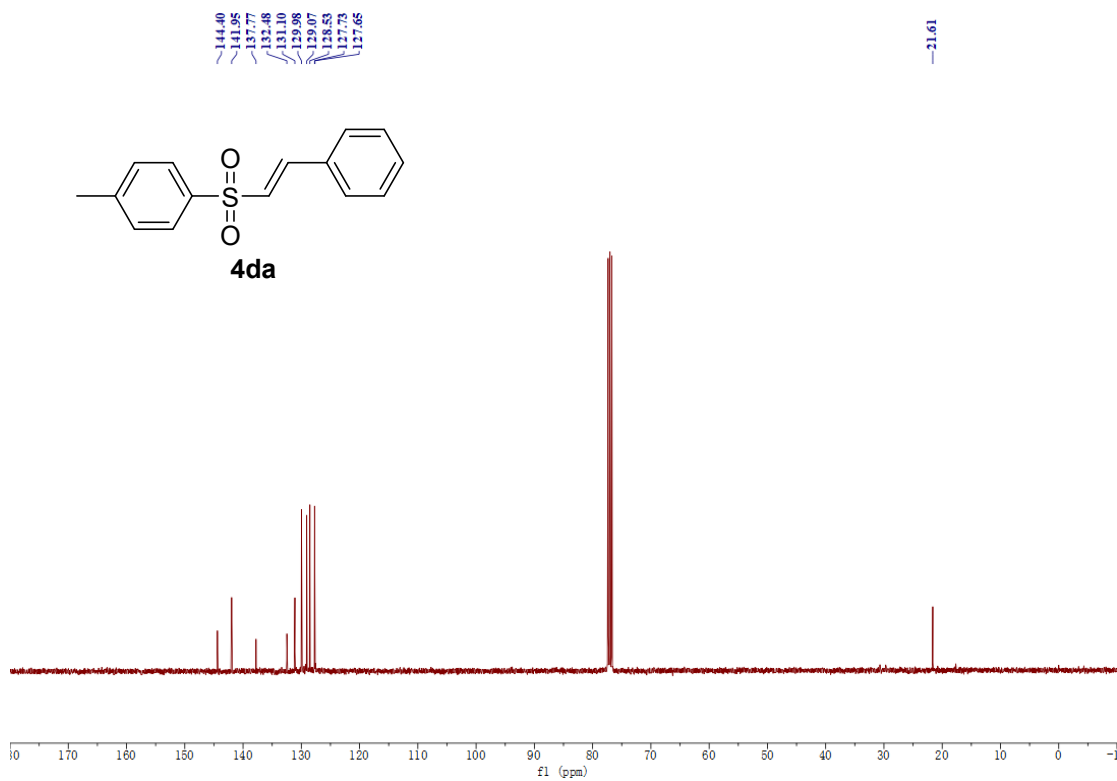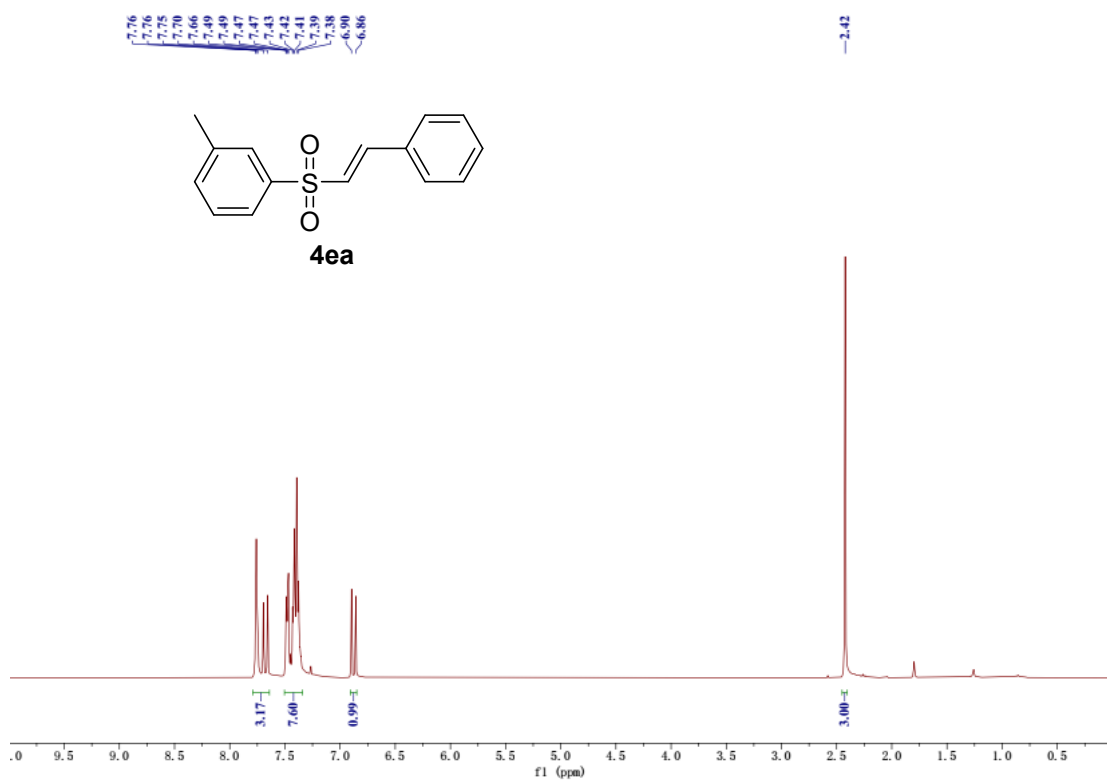

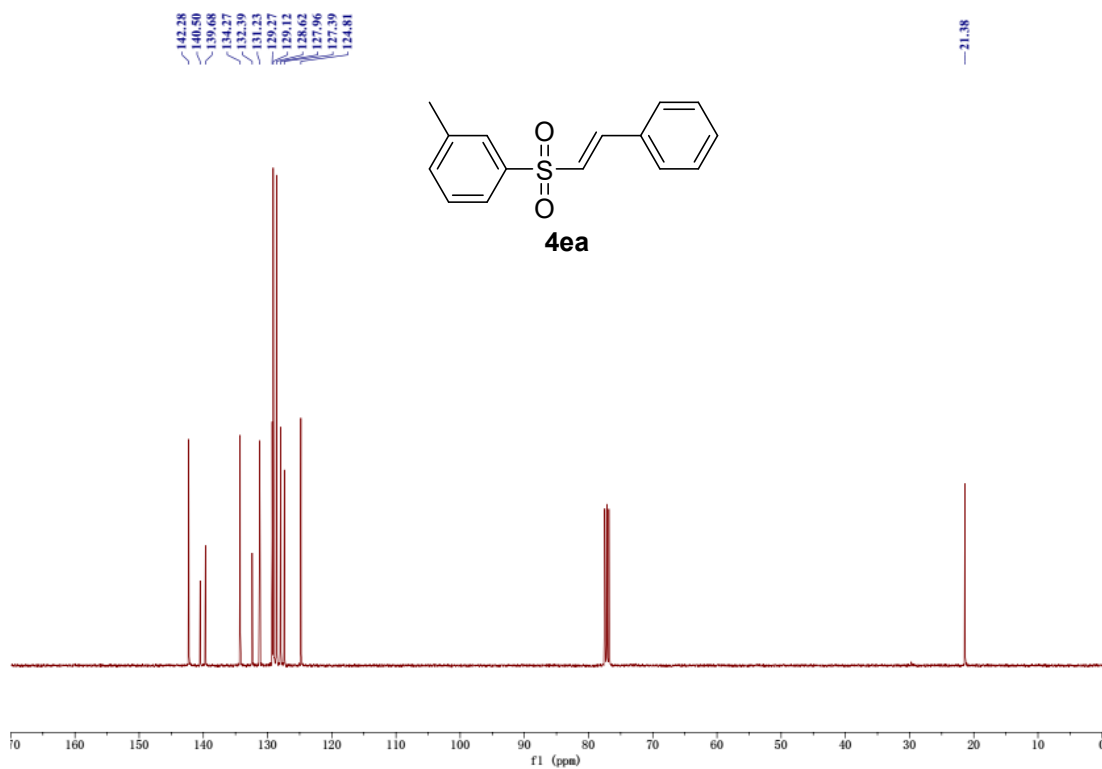

Supplement: d3ob00729d1.pdf [file d3ob00729d1.pdf]
